# Supplementary material for: Seagrass genomes reveal ancient polyploidy and adaptations to the marine environment
Source: Springer Nature journal article supplement (doi:10.1038/s41477-023-01608-5), 2024-01-26
Supplement: MOESM1 [file 41477_2023_1608_MOESM1_ESM.pdf]

---

# Seagrass genomes reveal ancient polyploidy and adaptations to the marine environment

---

In the format provided by the authors and unedited

---

1 **Supplementary Notes, Tables, and Figures**

2 **TABLE OF CONTENTS**

3 **1. SAMPLING SPECIES, METADATA, AND DNA AND RNA PREPARATION** .....5

4     **Supplementary Figure 1.1** Phylogenetic tree of Alismatales, including seagrasses. ....5

5     **Supplementary Table 1.1** Plant material metadata. ....6

6 **2. GENOME SEQUENCING AND ASSEMBLIES** .....7

7 **2.1 Nuclear genomes**..... 7

8     **Supplementary Table 2.1.1** Genomic libraries included in each seagrass genome assembly and their

9     respective assembled sequence coverage levels in the final release. ....7

10     **Supplementary Figure 2.1.1** Genome assembly pipeline used for *T. testudinum*, *P. oceanica* and *C. nodosa* .7

11     **Supplementary Table 2.1.2** Summary statistics of the initial output of the primary RACON polished HiFiAsm

12     assembly. ....8

13     **Supplementary Note 2.1** Final Primary assemblies for main and alternate haplotypes. ....9

14     **Supplementary Table 2.1.3** Final summary primary and alternate assembly statistics for each chromosome-

15     scale assembly (see for further details on *Zostera marina* v3.1). ....10

16     **Supplementary Figure 2.1.2** Distribution of the genomic features for the 26 largest scaffolds of *P.*

17     *acutifolius*. ....11

18     **Supplementary Table 2.1.4.** Primary genome assembly, annotation statistics and BUSCO completeness

19     assessment of protein coding sequences. See Supplementary Table 2.1.3 for additional details for the

20     alternate haplotypes .....12

21 **2.2 Chloroplast genomes** ..... 13

22     **Supplementary Note 2.2** Chloroplast genome assemblies and annotations .....13

23     **Supplementary Figure 2.2.1** The complete *C. nodosa* chloroplast genome.....13

24     **Supplementary Figure 2.2.2** The complete *Z. marina* chloroplast genome. ....14

25     **Supplementary Figure 2.2.3** The complete *T. testudinum* chloroplast genome. ....15

26     **Supplementary Figure 2.2.4** The complete *P. oceanica* chloroplast genome. ....16

27 **2.3 Mitochondrial genomes** ..... 16

28     **Supplementary Note 2.3** Mitochondrial genome assemblies and annotations .....16

29     **Supplementary Figure 2.3** *C. nodosa* mitochondrial chromosomes according to genome recombination

30     activity.....17

31 **2.4 Nuclear-mitochondria and nuclear-chloroplast transfer** ..... 18

32     **Supplementary Note 2.4** Nuclear-mitochondria (NUMTs) and nuclear-chloroplast (NUPTs) integrants. ....18

33     **Supplementary Table 2.4** NUMTs and NUPTs.....18

34 **3. GENOME ANNOTATION** ..... 19

35 **3.1 Non-protein coding RNA annotations** ..... 19

36     **Supplementary Note 3.1** rRNA, tRNA and snRNAs .....19

|    |                                                                                                                                           |    |
|----|-------------------------------------------------------------------------------------------------------------------------------------------|----|
| 37 | <b>Supplementary Table 3.1</b> Number of loci of major families of non-protein coding RNAs detected in                                    |    |
| 38 | seagrasses. ....                                                                                                                          | 20 |
| 39 | <b>Supplementary Figure 3.1</b> Organization of 18S, 5.8S and 28S rRNA repeat units and in the clusters on                                |    |
| 40 | seagrasses chromosomes. ....                                                                                                              | 21 |
| 41 | <b>3.2 Transcriptome libraries, sequencing, and assembly</b> .....                                                                        | 22 |
| 42 | <b>Supplementary Note 3.2</b> Transcriptome libraries .....                                                                               | 22 |
| 43 | <b>Supplementary Table 3.2.1</b> Transcriptome sequencing data for <i>Thalassia testudinum</i> .....                                      | 22 |
| 44 | <b>Supplementary Table 3.2.2</b> Transcriptome sequencing data for <i>Posidonia oceanica</i> .....                                        | 23 |
| 45 | <b>Supplementary Table 3.2.3</b> Transcriptome sequencing data for <i>Cymodocea nodosa</i> .....                                          | 23 |
| 46 | <b>Supplementary Table 3.2.4</b> Transcriptome sequencing data for <i>Potamogeton acutifolius</i> . ....                                  | 24 |
| 47 | <b>4. GENOME EVOLUTION</b> .....                                                                                                          | 25 |
| 48 | <b>4.1 Transposable elements</b> .....                                                                                                    | 25 |
| 49 | <b>Supplementary Table 4.1</b> Statistics on transposable elements (TE).....                                                              | 25 |
| 50 | <b>Supplementary Figure 4.1</b> Insertion time distributions of LTR/Gypsy and LTR/Copia in <i>T. testudinum</i> , <i>P.</i>               |    |
| 51 | <i>oceanica</i> , <i>C. nodosa</i> and <i>Z. marina</i> . Note differences in the scale of the y-axis. See main text for details.....     | 25 |
| 52 | <b>4.2 Identifying Whole Genome Duplications (WGD)</b> .....                                                                              | 26 |
| 53 | <b>Supplementary Note 4.2.1</b> <i>K<sub>s</sub></i> age distributions.....                                                               | 26 |
| 54 | <b>Supplementary Figure 4.2.1</b> <i>K<sub>s</sub></i> distributions for anchor pair duplicates (duplicates laying in duplicated,         |    |
| 55 | colinear blocks) and the whole paranome of four seagrasses, as well as for <i>P. acutifolius</i> and <i>S. polyrhiza</i> ,                |    |
| 56 | generated by the wgd software (see Methods). ....                                                                                         | 27 |
| 57 | <b>Supplementary Figure 4.2.2</b> Comparison of <i>Z. marina</i> , <i>P. oceanica</i> , and <i>T. testudinum</i> with a reconstructed     |    |
| 58 | ancestral monocot karyotype (AMK) (Murat et al. 2017). ....                                                                               | 28 |
| 59 | <b>Supplementary Figure 4.2.3</b> Comparison of the ancestral monocot karyotype (AMK) (Murat et al. 2017) with                            |    |
| 60 | <i>C. nodosa</i> and comparison of <i>P. oceanica</i> and <i>C. nodosa</i> . ....                                                         | 29 |
| 61 | <b>Supplementary Figure 4.2.4</b> Comparison of <i>P. acutifolius</i> with the ancestral monocot karyotype (AMK)                          |    |
| 62 | (Murat et al. 2017), <i>Z. marina</i> , <i>P. oceanica</i> , and <i>C. nodosa</i> , respectively. ....                                    | 30 |
| 63 | <b>Supplementary Figure 4.2.5</b> <i>K<sub>s</sub></i> Distributions for paralogs and the whole paranome of four seagrasses and <i>P.</i> |    |
| 64 | <i>acutifolius</i> generated by KSRATES software. ....                                                                                    | 31 |
| 65 | <b>Supplementary Note 4.2.2</b> Gene tree-species tree reconciliation.....                                                                | 32 |
| 66 | <b>Supplementary Figure 4.2.6</b> Bayesian inference of retention rates (q) of 11 hypothetical WGD models in                              |    |
| 67 | WHALE (Zwaenepoel and Van de Peer 2019a). ....                                                                                            | 33 |
| 68 | <b>Supplementary Note 4.2.3</b> Absolute dating of WGDs.....                                                                              | 34 |
| 69 | <b>Supplementary Figure 4.2.7</b> Estimation of the 'absolute age' of the WGT/WGD events in seagrasses and <i>P.</i>                      |    |
| 70 | <i>acutifolius</i> by phylogenomic dating. ....                                                                                           | 35 |
| 71 | <b>Supplementary Table 4.2</b> The absolute of WGD events taken from literature .....                                                     | 36 |
| 72 | <b>Supplementary Figure 4.2.8</b> Estimation of the 'absolute age' of seven independent WGD events                                        |    |
| 73 | experienced by <i>E. guineensis</i> , <i>A. officinalis</i> , <i>R. apiculata</i> , <i>A. marina</i> and <i>U. gibba</i> respectively by  |    |
| 74 | phylogenomic dating of corresponding paralogues. ....                                                                                     | 37 |
| 75 | <b>4.3 Phylogenetic tree construction and estimation of divergence time</b> .....                                                         | 38 |
| 76 | <b>Supplementary Note 4.3</b> Species selection and construction of time-calibrated phylogeny. ....                                       | 38 |

|     |                                                                                                                                             |    |
|-----|---------------------------------------------------------------------------------------------------------------------------------------------|----|
| 77  | <b>5. ADAPTATION TO THE MARINE ENVIRONMENT</b> .....                                                                                        | 39 |
| 78  | <b>5.1. Use it or lose it</b> .....                                                                                                         | 39 |
| 79  | <b>Supplementary Figure 5.1</b> Normalized gene counts for each species .....                                                               | 39 |
| 80  | <b>5.2 Pathogen resistance (R-) genes</b> .....                                                                                             | 40 |
| 81  | <b>Supplementary Note 5.2</b> Pathogen resistance gene .....                                                                                | 40 |
| 82  | <b>Supplementary Table 5.2</b> <i>NLR</i> gene counts by domain architecture and completeness in seagrasses and <i>P.</i>                   |    |
| 83  | <i>acutifolius</i> . .....                                                                                                                  | 41 |
| 84  | <b>Supplementary Figure 5.2.1</b> Phylogenetic tree of seagrass <i>NLR</i> genes based on NBS domain. ....                                  | 42 |
| 85  | <b>Supplementary Figure 5.2.2</b> Distribution of seagrass <i>NLR</i> genes across chromosomes. ....                                        | 43 |
| 86  | <b>5.3 Heat Shock factor (HSF) gene family evolution</b> .....                                                                              | 43 |
| 87  | <b>Supplementary Note 5.3</b> <i>HSF</i> gene family .....                                                                                  | 43 |
| 88  | <b>Supplementary Table 5.3</b> Average ( $\pm$ SD) number of total <i>HSFs</i> and number of <i>HSFs</i> from the three main                |    |
| 89  | classes ( <i>HSFA</i> , <i>HSFB</i> and <i>HSFC</i> ) in the analyzed plant genomes. ....                                                   | 45 |
| 90  | <b>5.4 Cellular salt tolerance</b> .....                                                                                                    | 46 |
| 91  | <b>Supplementary Figure 5.4.1</b> Sequence alignment showing amino acid substitutions in regulatory domains of                              |    |
| 92  | <i>SOS1</i> orthologs of seagrasses, indicating a diverged but convergent regulation of <i>SOS1/NHX7</i> in these                           |    |
| 93  | species. ....                                                                                                                               | 46 |
| 94  | <b>Supplementary Figure 5.4.2</b> Sequence alignment of <i>AKT5/6/1</i> showing the loss of Shaker-type $K^+$ channels                      |    |
| 95  | with a TTGYGD-selectivity filter in all seagrasses. ....                                                                                    | 47 |
| 96  | <b>5.5 Hypoxia</b> .....                                                                                                                    | 48 |
| 97  | <b>Supplementary Figure 5.5.1</b> Differential expression of <i>ERF-VII</i> s in the four seagrass species. ....                            | 48 |
| 98  | <b>Supplementary Figure 5.5.2</b> Syntenic relationship of genes mentioned in the main text for <i>P. oceanica</i> , <i>T.</i>              |    |
| 99  | <i>testudinum</i> , <i>Z. marina</i> , <i>C. nodosa</i> , and <i>P. acutifolius</i> . ....                                                  | 49 |
| 100 | <b>5.6 Light perception, circadian clock, and photosynthetic carbon acquisition</b> .....                                                   | 50 |
| 101 | <b>Supplementary Note 5.6.1</b> $CO_2$ -concentrating mechanisms (CCMs) and photosynthetic carbon acquisition 50                            |    |
| 102 | <b>Supplementary Table 5.6</b> Prediction of sub-cellular localizations of $\alpha$ -Carbonic Anhydrases ( $\alpha$ -CA) in the             |    |
| 103 | studied seagrass species and <i>P. acutifolius</i> . ....                                                                                   | 51 |
| 104 | .....                                                                                                                                       | 52 |
| 105 | <b>Supplementary Figure 5.6.1</b> Differential expression of $\alpha$ -CA, $\beta$ -CA and $\lambda$ -CA in root, rhizome, flower, and leaf |    |
| 106 | tissues of the studied seagrass species. ....                                                                                               | 52 |
| 107 | <b>Supplementary Note 5.6.2</b> Photosynthesis .....                                                                                        | 53 |
| 108 | <b>Supplementary Figure 5.6.2</b> Gene families containing photosystems I and II components and Light-                                      |    |
| 109 | harvesting chlorophyll protein complex. ....                                                                                                | 54 |
| 110 | <b>Supplementary Figure 5.6.3</b> Differential expression of Cyt b6/f complex, <i>LHCB</i> and electron transport genes                     |    |
| 111 | in <i>Z. marina</i> and <i>C. nodosa</i> . ....                                                                                             | 55 |
| 112 | <b>Supplementary Note 5.6.3</b> Light Signaling & Circadian Clock .....                                                                     | 55 |
| 113 | <b>Supplementary Figure 5.6.4</b> Gene families containing photoreceptors and the main integration of light                                 |    |
| 114 | signalling toolkit genes. ....                                                                                                              | 57 |
| 115 | <b>Supplementary Figure 5.6.5</b> The N terminus alignment of UVB-Resistance 8. ....                                                        | 58 |
| 116 | <b>Supplementary Figure 5.6.6</b> Phylogenetic tree of phytochromes obtained from the 84 proteins sequences                                 |    |
| 117 | included in the orthogroups OG0007303, OG0003273, OG0011336 and OG0026441. ....                                                             | 59 |

|     |                                                                                                                      |    |
|-----|----------------------------------------------------------------------------------------------------------------------|----|
| 118 | <b>5.7 NAC transcriptional factors</b> .....                                                                         | 60 |
| 119 | <b>Supplementary Note 5.7</b> NAC transcriptional factors .....                                                      | 60 |
| 120 | <b>Supplementary Figure 5.7</b> Evolutionary analysis by Maximum Likelihood method of <i>JUB1</i> in seagrasses..... | 60 |
| 121 | <b>5.8 Nitrogen metabolism</b> .....                                                                                 | 61 |
| 122 | <b>Supplementary Note 5.8</b> Nitrogen metabolism.....                                                               | 61 |
| 123 | <b>5.9 Flower and pollen development</b> .....                                                                       | 61 |
| 124 | <b>Supplementary Note 5.9</b> Flower and pollen development.....                                                     | 61 |
| 125 | <b>Supplementary Table 5.9.</b> The MADS-box genes in seagrasses and <i>P. acutifolius</i> .....                     | 62 |
| 126 | <b>Supplementary Figure 5.9</b> Normalized gene copy numbers for flower and pollen development genes and             |    |
| 127 | gene families for 96 species, including 6 genomic data and 90 transcriptomic data .....                              | 63 |
| 128 |                                                                                                                      |    |
| 129 |                                                                                                                      |    |

# 1. Sampling species, metadata, and DNA and RNA preparation

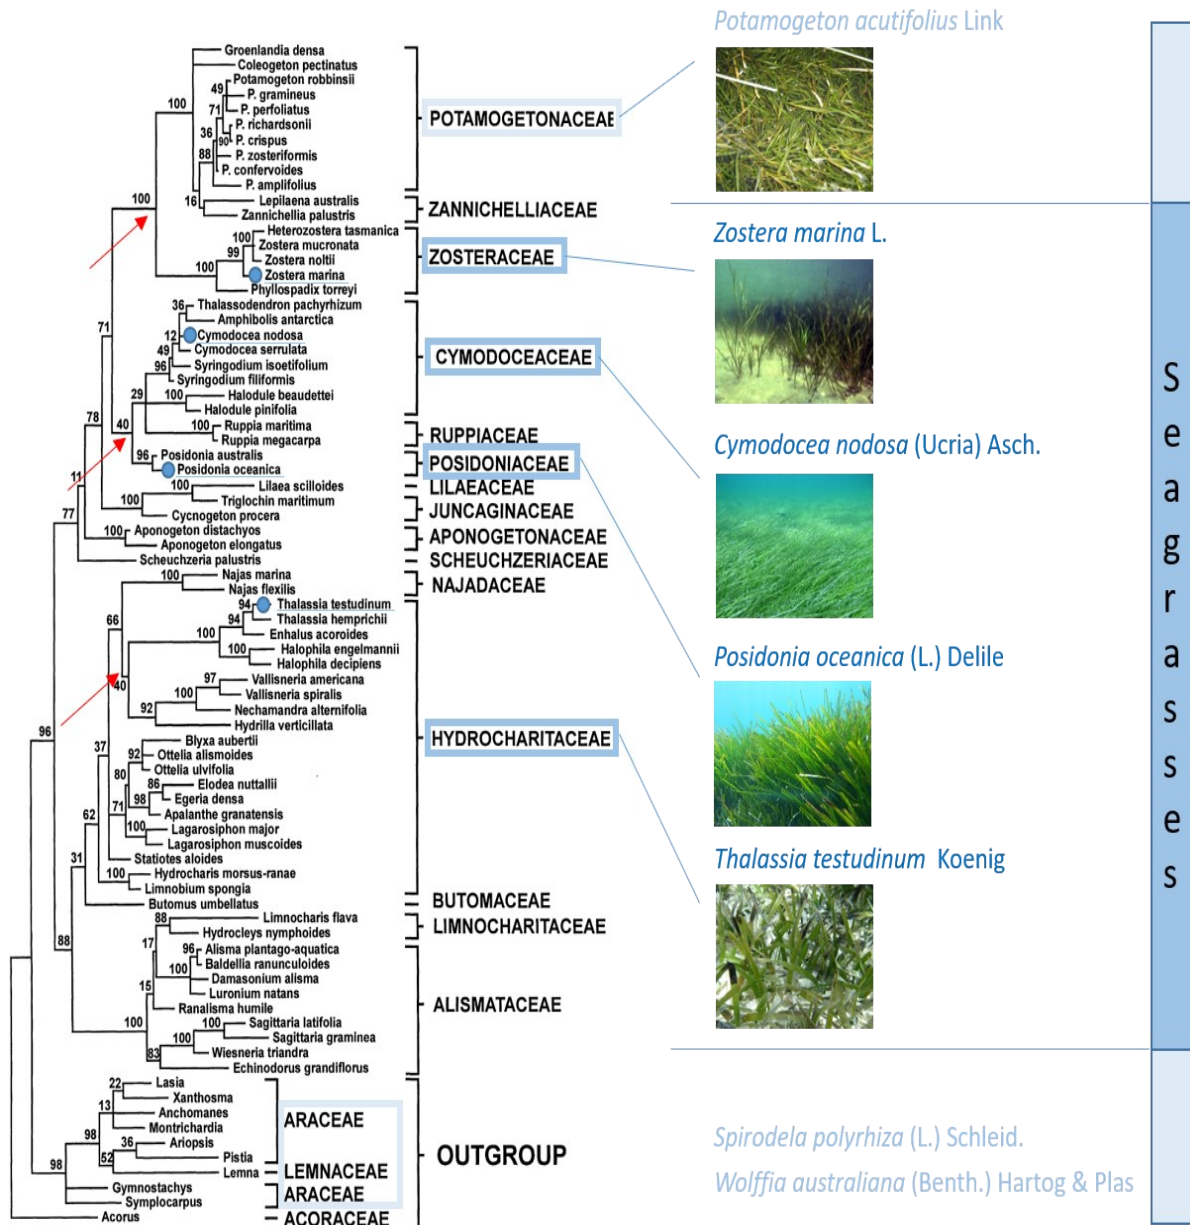

131  
132

**Supplementary Figure 1.1** Phylogenetic tree of Alismatales, including seagrasses.

133  
134  
135  
136  
137

The tree is based on a Maximum parsimony analysis of *rbcL* genes, adapted from (Les et al. 1997). The four seagrass species discussed in the present study are marked by blue dots. The one freshwater species sequenced in the present study, *Potamogeton acutifolius*, is missing from the tree, but close relatives are included (sister group of Zosteraceae). Solid red arrows indicate nodes denoting the aquatic-marine splits.

138  
139

140 **Supplementary Table 1.1 Plant material metadata.**

141 See Materials and Methods for details on DNA and RNA preparation. Additional information for *Zostera marina*  
 142 can be found in (Olsen et al. 2016) and (Ma et al. 2021a).

| Species                                                                                                       | Code   | Location                                               | Date         | Collectors                    | Depth  | Lat      | Long     | Tissue                                      | HMW DNA extraction method /RNA extraction method                                                     |
|---------------------------------------------------------------------------------------------------------------|--------|--------------------------------------------------------|--------------|-------------------------------|--------|----------|----------|---------------------------------------------|------------------------------------------------------------------------------------------------------|
| <i>Thalassia testudinum</i><br><br>Diploid<br>2N=18                                                           | Tt-101 | Coconut Grove Dog Park, Crocodile Point, Miami, FL USA | 12 June 2019 | JL Olsen & JE Campbell        | -1 m   | 40.78735 | 14.08974 | Leaf<br><br>Leaf Rhizome                    | CTAB via Arizona Genomics Institute.<br><br>/NucleoSpin RNA Plant and Fungi Kit (Machery Nagel, USA) |
| <i>Posidonia oceanica</i><br><br>Diploid<br>2N=20                                                             | Po-2   | Gulf of Pozzuoli, Napoli, Italy                        | 15 May 2019  | G Procaccini                  | -7 m   | 40.78735 | 14.08974 | Leaf<br><br>Leaf Rhizome<br>Root            | As above<br><br>As above                                                                             |
| <i>Cymodocea nodosa</i><br><br>Diploid<br>2N=18<br>Known polyploidy in some populations                       | Cn-1   | Miseno Cape, Napoli, Italy                             | 15 May 2019  | G Procaccini & L Marin Guirao | -10 m  | 40.78396 | 14.07458 | Leaf<br><br>Leaf Rhizome<br>Root<br>Flowers | As above<br><br>As above                                                                             |
| <i>Potamogeton acutifolius</i><br><br>Diploid<br>2N=26<br>Known polyploidy in other species<br><br>Freshwater | Pa     | Baláta-lake, Hungary, Somogy county, near Kaszó        | 18 Sept 2020 | A. Mesterházy                 | -1.2 m | 14.31388 | 17.205   | Leaf<br><br>Leaf Turion<br>Root             | Max Planck-Genome with a NucleoBond HMW DNA kit (Macherey Nagel).<br><br>RNAeasy Plant Kit (Qiagen)  |

143

144

145 **2. Genome sequencing and assemblies**

146 **2.1 Nuclear genomes**

147 **Supplementary Table 2.1.1** Genomic libraries included in each seagrass genome assembly and their  
 148 respective assembled sequence coverage levels in the final release.

|                                | Library        | Sequencing Platform | Average Read/Insert Size | Read Number   | Assembled Sequence Coverage (x) |
|--------------------------------|----------------|---------------------|--------------------------|---------------|---------------------------------|
| <i>Thalassia testudinum</i>    | JDRM           | Illumina            | 400                      | 2,454,318,746 | 92.04                           |
|                                | IYTB           | Illumina/HiC        | N/A                      | 1,829,959,374 | 68.62                           |
|                                | Total Illumina |                     |                          | 4,284,278,120 | 161                             |
|                                |                | PacBio HiFi         | 18,712*                  | 11,884,855    | 51.53                           |
| <i>Posidonia oceanica</i>      | JDRD           | Illumina            | 400                      | 2,700,014,314 | 135                             |
|                                | JDMC           | Illumina/HiC        | N/A                      | 3,843,643,266 | 192.1                           |
|                                | Total Illumina |                     |                          | 6,543,657,580 | 327                             |
|                                |                | PacBio HiFi         | 19,006*                  | 12,018,008    | 79.44                           |
| <i>Cymodocea nodosa</i>        | JLSQ           | Illumina            | 400                      | 397,732,894   | 119.3                           |
|                                | JHNL           | Illumina/HiC        | N/A                      | 296,170,716   | 88.9                            |
|                                | Total Illumina |                     |                          | 693,903,610   | 208                             |
|                                |                | PacBio HiFi         | 23,472*                  | 1,698,568     | 79.24                           |
| <i>Potamogeton acutifolius</i> | N/A            | Illumina/Tell-Seq   | N/A                      | 54,401,190    | 13.4                            |
|                                | N/A            | PacBio HiFi         | 14,000*                  | 1,900,000     | 43.5                            |

149 \*Average read length of PacBio reads

150

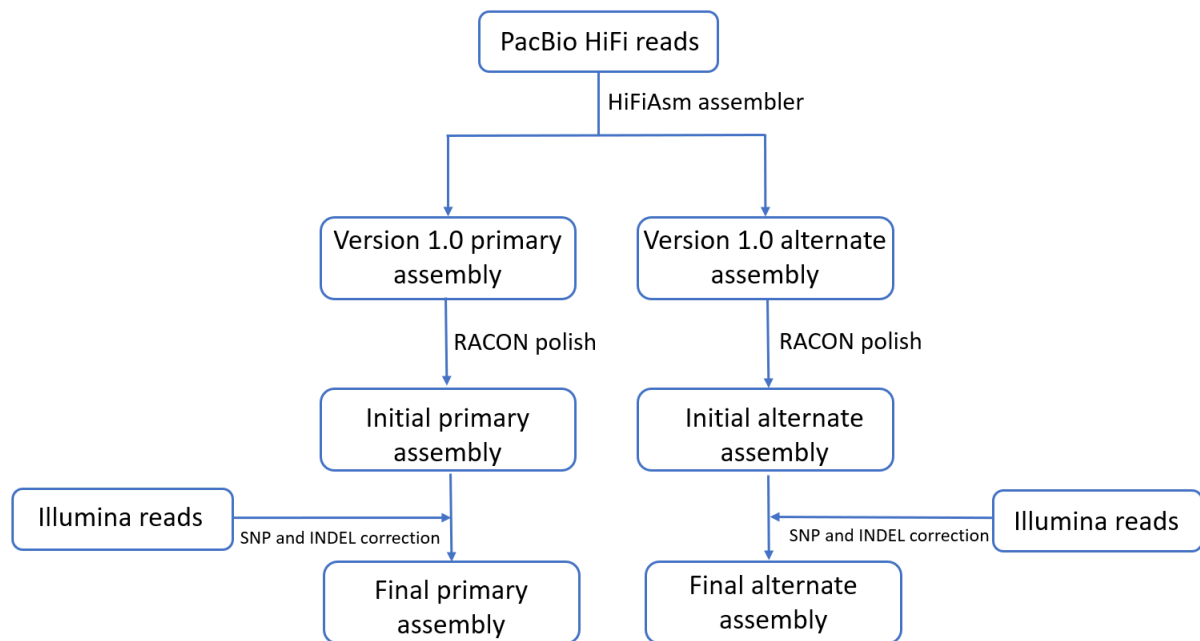

151

152

153 **Supplementary Figure 2.1.1** Genome assembly pipeline used for *T. testudinum*, *P. oceanica* and *C.*  
 154 *nodosa*

155



156  
157  
158  
159

**Supplementary Table 2.1.2** Summary statistics of the initial output of the primary RACON polished HiFiAsm assembly.

The table shows number of contigs and total numbers of assembled base pairs for each set of scaffolds greater than the size listed in the left-hand column.

|                             | Minimum Scaffold Length | Number of Scaffolds | Number of Contigs | Scaffold Size | Basepairs     | % Non-gap Basepairs |
|-----------------------------|-------------------------|---------------------|-------------------|---------------|---------------|---------------------|
| <i>Thalassia testudinum</i> | 5 Mb                    | 14                  | 14                | 4,757,383,018 | 4,757,383,018 | 100.00%             |
|                             | 2.5 Mb                  | 14                  | 14                | 4,757,383,018 | 4,757,383,018 | 100.00%             |
|                             | 1 Mb                    | 17                  | 17                | 4,761,201,586 | 4,761,201,586 | 100.00%             |
|                             | 500 Kb                  | 21                  | 21                | 4,764,120,924 | 4,764,120,924 | 100.00%             |
|                             | 250 Kb                  | 29                  | 29                | 4,766,780,278 | 4,766,780,278 | 100.00%             |
|                             | 100 Kb                  | 152                 | 152               | 4,784,190,954 | 4,784,190,954 | 100.00%             |
|                             | 50 Kb                   | 609                 | 609               | 4,813,980,144 | 4,813,980,144 | 100.00%             |
|                             | 25 Kb                   | 1,965               | 1,965             | 4,865,616,055 | 4,865,616,055 | 100.00%             |
|                             | 10 Kb                   | 1,987               | 1,987             | 4,866,121,113 | 4,866,121,113 | 100.00%             |
|                             | 5 Kb                    | 1,987               | 1,987             | 4,866,121,113 | 4,866,121,113 | 100.00%             |
|                             | 2.5 Kb                  | 1,987               | 1,987             | 4,866,121,113 | 4,866,121,113 | 100.00%             |
|                             | 1 Kb                    | 1,987               | 1,987             | 4,866,121,113 | 4,866,121,113 | 100.00%             |
| 0 bp                        | 1,987                   | 1,987               | 4,866,121,113     | 4,866,121,113 | 100.00%       |                     |
| <i>Posidonia oceanica</i>   | 5 Mb                    | 15                  | 15                | 3,003,306,251 | 3,003,306,251 | 100.00%             |
|                             | 2.5 Mb                  | 15                  | 15                | 3,003,306,251 | 3,003,306,251 | 100.00%             |
|                             | 1 Mb                    | 21                  | 21                | 3,012,259,886 | 3,012,259,886 | 100.00%             |
|                             | 500 Kb                  | 29                  | 29                | 3,017,253,515 | 3,017,253,515 | 100.00%             |
|                             | 250 Kb                  | 52                  | 52                | 3,024,690,979 | 3,024,690,979 | 100.00%             |
|                             | 100 Kb                  | 201                 | 201               | 3,045,962,177 | 3,045,962,177 | 100.00%             |
|                             | 50 Kb                   | 1,061               | 1,061             | 3,100,982,328 | 3,100,982,328 | 100.00%             |
|                             | 25 Kb                   | 3,383               | 3,383             | 3,190,011,804 | 3,190,011,804 | 100.00%             |
|                             | 10 Kb                   | 3,468               | 3,468             | 3,191,950,648 | 3,191,950,648 | 100.00%             |
|                             | 5 Kb                    | 3,468               | 3,468             | 3,191,950,648 | 3,191,950,648 | 100.00%             |
|                             | 2.5 Kb                  | 3,468               | 3,468             | 3,191,950,648 | 3,191,950,648 | 100.00%             |
|                             | 1 Kb                    | 3,470               | 3,470             | 3,191,952,950 | 3,191,952,950 | 100.00%             |
| 0 bp                        | 3,470                   | 3,470               | 3,191,952,950     | 3,191,952,950 | 100.00%       |                     |
| <i>Cymodocea nodosa</i>     | 5 Mb                    | 21                  | 21                | 370,838,187   | 370,838,187   | 100.00%             |
|                             | 2.5 Mb                  | 22                  | 22                | 375,803,086   | 375,803,086   | 100.00%             |
|                             | 1 Mb                    | 26                  | 26                | 381,781,051   | 381,781,051   | 100.00%             |
|                             | 500 Kb                  | 27                  | 27                | 382,524,700   | 382,524,700   | 100.00%             |
|                             | 250 Kb                  | 46                  | 46                | 388,996,552   | 388,996,552   | 100.00%             |
|                             | 100 Kb                  | 148                 | 148               | 403,137,124   | 403,137,124   | 100.00%             |
|                             | 50 Kb                   | 678                 | 678               | 437,596,903   | 437,596,903   | 100.00%             |
|                             | 25 Kb                   | 1,362               | 1,362             | 465,959,990   | 465,959,990   | 100.00%             |
|                             | 10 Kb                   | 1,362               | 1,362             | 465,959,990   | 465,959,990   | 100.00%             |
|                             | 5 Kb                    | 1,362               | 1,362             | 465,959,990   | 465,959,990   | 100.00%             |
|                             | 2.5 Kb                  | 1,362               | 1,362             | 465,959,990   | 465,959,990   | 100.00%             |
|                             | 1 Kb                    | 1,362               | 1,362             | 465,959,990   | 465,959,990   | 100.00%             |
| 0 bp                        | 1,362                   | 1,362               | 465,959,990       | 465,959,990   | 100.00%       |                     |

160

161 **Supplementary Note 2.1 Final Primary assemblies for main and alternate haplotypes.**

162 The final primary assembly (see Methods) of *T. testudinum* contains 4,261.9 Mb of sequence, consisting of 184  
163 contigs with a contig N50 of 371.6 Mb and a total of 98.92% of assembled bases in 9 chromosomes. The final  
164 primary assembly of *P. oceanica* contains 2,963.0 Mb of sequence, consisting of 19 contigs with a contig N50 of  
165 355.8 Mb and a total of 99.98% of assembled bases in 10 chromosomes. The final primary assembly of *C. nodosa*  
166 contains 379.5 Mb of sequence, consisting of 22 contigs with a contig N50 of 21.9 Mb and a total of 100% of  
167 assembled bases in 18 chromosomes (Supplementary Table 2.1.3).

168 Correspondingly, the final alternative release of *T. testudinum* contains 4,177.2 Mb of sequence, consisting of  
169 3,364 contigs with a contig N50 of 6.1 Mb and a total of 85.18% of assembled bases in 9 chromosomes. The final  
170 alternative release of *P. oceanica* contains 2,496.3 Mb of sequence, consisting of 826 contigs with a contig N50  
171 of 8.7 Mb and a total of 99.67% of assembled bases in 10 chromosomes. The final alternative assembly for *C.*  
172 *nodosa* contains 374.7 Mb of sequence, consisting of 28 contigs with a contig N50 of 20.8 Mb and a total of  
173 99.91% of assembled bases in 18 chromosomes (Supplementary Table 2.1.3). The final assembly of *P. acutifolius*  
174 is in the Table 1.

175

176  
177

**Supplementary Table 2.1.3** Final summary primary and alternate assembly statistics for each chromosome-scale assembly (see for further details on *Zostera marina* v3.1).

| Final Primary Assembly Release Haplotype 1     | genome release stats:                                    | <i>Thalassia testudinum</i> | <i>Posidonia oceanica</i> | <i>Cymodocea nodosa</i> | <i>Zostera marina</i> v3.1 |
|------------------------------------------------|----------------------------------------------------------|-----------------------------|---------------------------|-------------------------|----------------------------|
|                                                | Number of chromosomes (1N)                               | 9                           | 10                        | 18                      | 6                          |
|                                                | Number of main genome scaffold total:                    | 169                         | 13                        | 18                      | 310                        |
|                                                | Number of main genome contig total:                      | 184                         | 19                        | 22                      | 432                        |
|                                                | Length of main genome scaffold sequence total: (MB)      | 4262.1                      | 2963.1                    | 379.6                   | 260.5                      |
|                                                | Length of main genome contig sequence total:             | 4261.9                      | 2963                      | 379.5                   | 259.3                      |
|                                                | Main genome scaffold L/N50: (MB)                         | 4/523.9                     | 4/355.8                   | 8/22.6                  | 4/34.6                     |
|                                                | Main genome contig L/N50: (MB)                           | 5/371.6                     | 4/355.8                   | 8/21.9                  | 12/7.0                     |
|                                                | Number of scaffolds > 50 KB:                             | 49                          | 13                        | 18                      | 217                        |
|                                                | % main genome in scaffolds > 50 KB:                      | 99.9                        | 100                       | 100                     | 98.9                       |
| Final Alternative Assembly Release Haplotype 2 | Number of chromosomes (1N)                               | 9                           | 10                        | 18                      | N/A                        |
|                                                | Number of alternate genome scaffold total:               | 2264                        | 29                        | 22                      | N/A                        |
|                                                | Number of alternate genome contig total:                 | 3364                        | 826                       | 28                      | N/A                        |
|                                                | Length of alternate genome scaffold sequence total: (MB) | 4188.2                      | 2504.3                    | 374.8                   | N/A                        |
|                                                | Length of alternate genome contig sequence total: (MB)   | 4177.2                      | 2496.3                    | 374.7                   | N/A                        |
|                                                | Genome scaffold L/N50: (MB)                              | 5 / 458.8 Mb                | 3/352.0                   | 8/22.1                  | N/A                        |
|                                                | Genome contig L/N50: (MB)                                | 162 / 6.1 Mb                | 85/8.7                    | 8/20.8                  | N/A                        |
|                                                | Number of scaffolds > 50 KB                              | 805                         | 29                        | 22                      | N/A                        |
|                                                | % main genome in scaffolds > 50 KB                       | 98.7                        | 100                       | 100                     | N/A                        |

178  
179

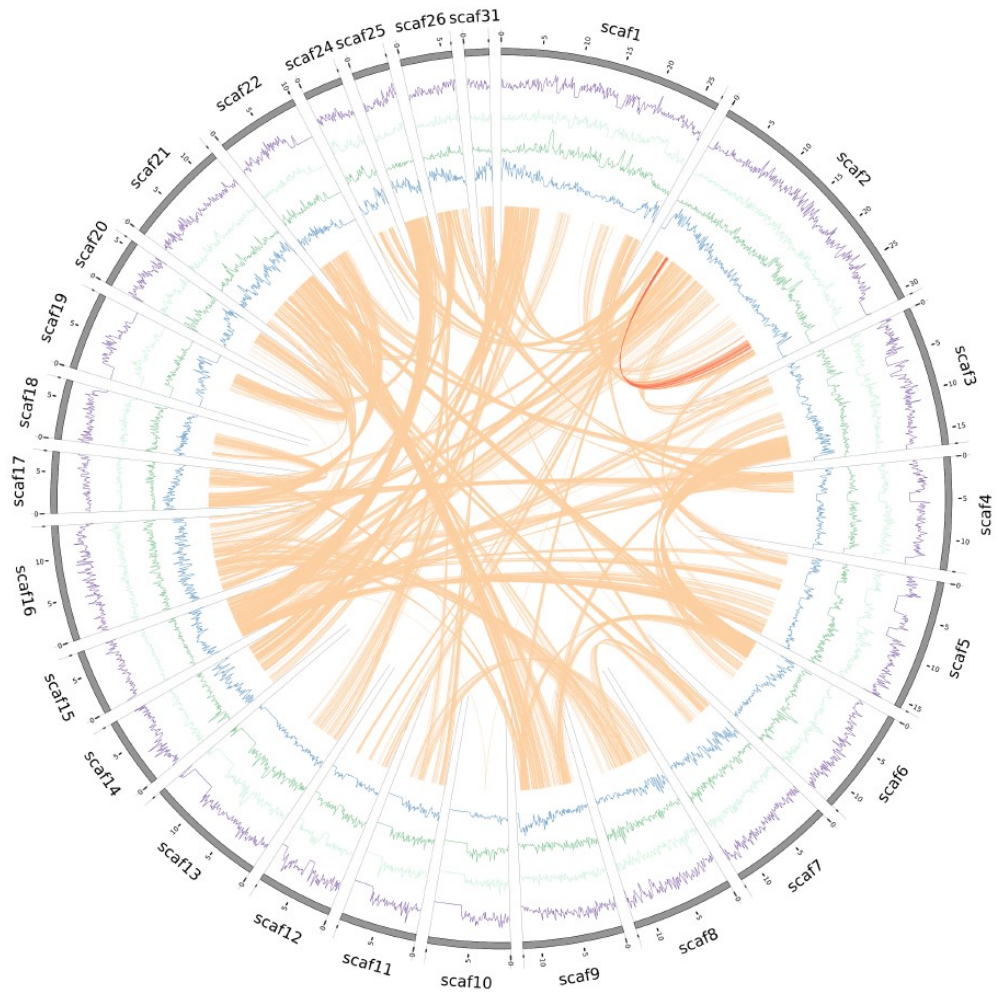

180

181 **Supplementary Figure 2.1.2** Distribution of the genomic features for the 26 largest scaffolds of *P.*  
 182 *acutifolius*.

183 Tracks from the inner to outer side correspond to gene density (blue); LTR/Gypsy density (green); LTR/Copia  
 184 (orange); DNA transposable elements (pink) and chromosomes (with length in Mb). Curved lines through the  
 185 center denote synteny between different scaffolds.

186

187 **Supplementary Table 2.1.4. Primary genome assembly, annotation statistics and BUSCO**  
 188 **completeness assessment of protein coding sequences.** See Supplementary Table 2.1.3 for additional  
 189 details for the alternate haplotypes.

| Statistics                   | <i>T. testudinum</i> | <i>P. oceanica</i> | <i>C. nodosa</i> | <i>Z. marina v 3.1</i><br>( <i>Ma et al. 2021b</i> ) | <i>P. acutifolius</i> |
|------------------------------|----------------------|--------------------|------------------|------------------------------------------------------|-----------------------|
| <b>Assembly</b>              |                      |                    |                  |                                                      |                       |
| Haploid-chromosome number    | 9                    | 10                 | 18               | 6                                                    | 13                    |
| Genome size, Mb              | 4261.9               | 2963.0             | 379.5            | 260.5                                                | 612                   |
| Contig N50, (Mb)             | 371.6                | 355.8              | 21.9             | 7.0                                                  | 3.09                  |
| Scaffold N50 (Mb)            | 523.9                | 355.8              | 22.6             | 34.6                                                 | 4.45                  |
| <b>Genome assembly BUSCO</b> |                      |                    |                  |                                                      |                       |
| Complete %                   | 73.3                 | 93.6               | 92.2             | 93.4                                                 | 96.9                  |
| single-copy %                | 72.1                 | 92.2               | 90.8             | 90.9                                                 | 93.7                  |
| duplicated %                 | 1.2                  | 1.4                | 1.4              | 2.5                                                  | 3.2                   |
| Fragmented %                 | 6.9                  | 2.7                | 2.7              | 1.1                                                  | 1.1                   |
| Missing %                    | 19.8                 | 3.7                | 5.1              | 5.5                                                  | 2.0                   |
| <b>Annotation</b>            |                      |                    |                  |                                                      |                       |
| Protein coding genes         | 25,665               | 23,306             | 20,563           | 22,256                                               | 21,277                |
| Mean gene length, bp         | 19,151               | 7,017              | 5,866            | 3,237                                                | 3,448                 |
| Mean CDS length, bp          | 1,077                | 1,210              | 1,207            | 1,241                                                | 1,290                 |
| Mean exon length, bp         | 218                  | 222                | 214              | 248                                                  | 243                   |
| Mean exon per gene           | 4.95                 | 5.46               | 5.65             | 5.01                                                 | 5.3                   |
| Mean intron length, bp       | 4,576                | 1,303              | 1,003            | 499                                                  | 503                   |
| Number of introns > 1 kb %   | 36.2                 | 24.2               | 22.5             | 9.5                                                  | 9.7                   |
| Number of introns > 10 kb %  | 13.5                 | 2.6                | 1.4              | 0.6                                                  | 0.3                   |
| Number of introns > 20 kb %  | 7.1                  | 0.7                | 0.2              | 0.06                                                 | 0.01                  |
| Longest intron, bp           | 283,604              | 224,280            | 89,280           | 46,497                                               | 34,817                |
| <b>Transcriptome support</b> |                      |                    |                  |                                                      |                       |
| TPM > 0 %                    | 87.4                 | 84.7               | 97.1             | 91.5                                                 | 82.7                  |
| TPM > 1 %                    | 72.9                 | 70.1               | 86.6             | 80.2                                                 | 75.6                  |
| <b>BUSCO</b>                 |                      |                    |                  |                                                      |                       |
| Complete %                   | <b>94.2</b>          | <b>97.4</b>        | <b>95.8</b>      | <b>95.7</b>                                          | <b>97.5</b>           |
| single-copy %                | 92.1                 | 95.2               | 94.4             | 93.2                                                 | 94.6                  |
| duplicated %                 | 2.1                  | 2.2                | 1.4              | 2.5                                                  | 2.9                   |
| Fragmented %                 | 1.1                  | 0.2                | 0.3              | 80.5                                                 | 0.2                   |
| Missing %                    | 4.7                  | 2.4                | 3.9              | 3.8                                                  | 2.3                   |
| <b>Functional annotation</b> |                      |                    |                  |                                                      |                       |
|                              | 92.3%                | 96.8%              | 91.8%            | 96.2%                                                | 98.9%                 |

190

191

192 2.2 Chloroplast genomes

193 **Supplementary Note 2.2 Chloroplast genome assemblies and annotations**

194 Complete chloroplast genomes were assembled *de novo* from Illumina short read data with NOVOPlasty using  
195 the *rbcL* gene as a seed (Dierckxsens et al. 2017). *Thalassia testudinum* cpDNA was additionally, manually  
196 curated according to the chloroplast derived PacBio contigs from the main genome assembly. The *Z. marina*  
197 genome was obtained from (Ma et al. 2021a). All chloroplast genomes were polished with pilon (Walker et al.  
198 2014) in addition to manual curation. The gene content of the chloroplast genomes was annotated using the  
199 software GeSeq (Tillich et al. 2017) and with Chloë (Zhong 2020). As the preferred annotator for CDS and rRNA,  
200 ARAGORN (Laslett and Canback 2004) was used for tRNA annotation. Genes that were much shorter than  
201 expected are marked as fragmented. Figures were drawn with Chloroplot (Zheng et al. 2020).

202 We identified 79, 78, 75, and 74 protein-coding genes (only counting genes in the inverted repeats once) in the  
203 *C. nodosa*, *Z. marina*, *T. testudinum*, and *P. oceanica* chloroplast genomes, respectively, of which *Z. marina* lost  
204 one gene (*rps19*), *T. testudinum* lost four genes (*accD*, *infA*, *ndhB*, and *ndhF*) and *P. oceanica* lost five genes  
205 (*ndhG*, *ndhH*, *ndhI*, *ndhJ*, and *ndhK*) (Supplementary Figure 2.2.1 – Supplementary Figure 2.2.4). We note that  
206 the chloroplast NADH dehydrogenase complex, encoded by *ndh* genes, has been lost in *P. oceanica* and *T.*  
207 *testudinum*. The loss has been proposed to have happened independently in various Alismatales lineages,  
208 correlating with the submerged fresh or marine habitat (Ross et al. 2016). Notably, the complex is lost in the  
209 two species that demonstrate the highest levels of genome perturbation.

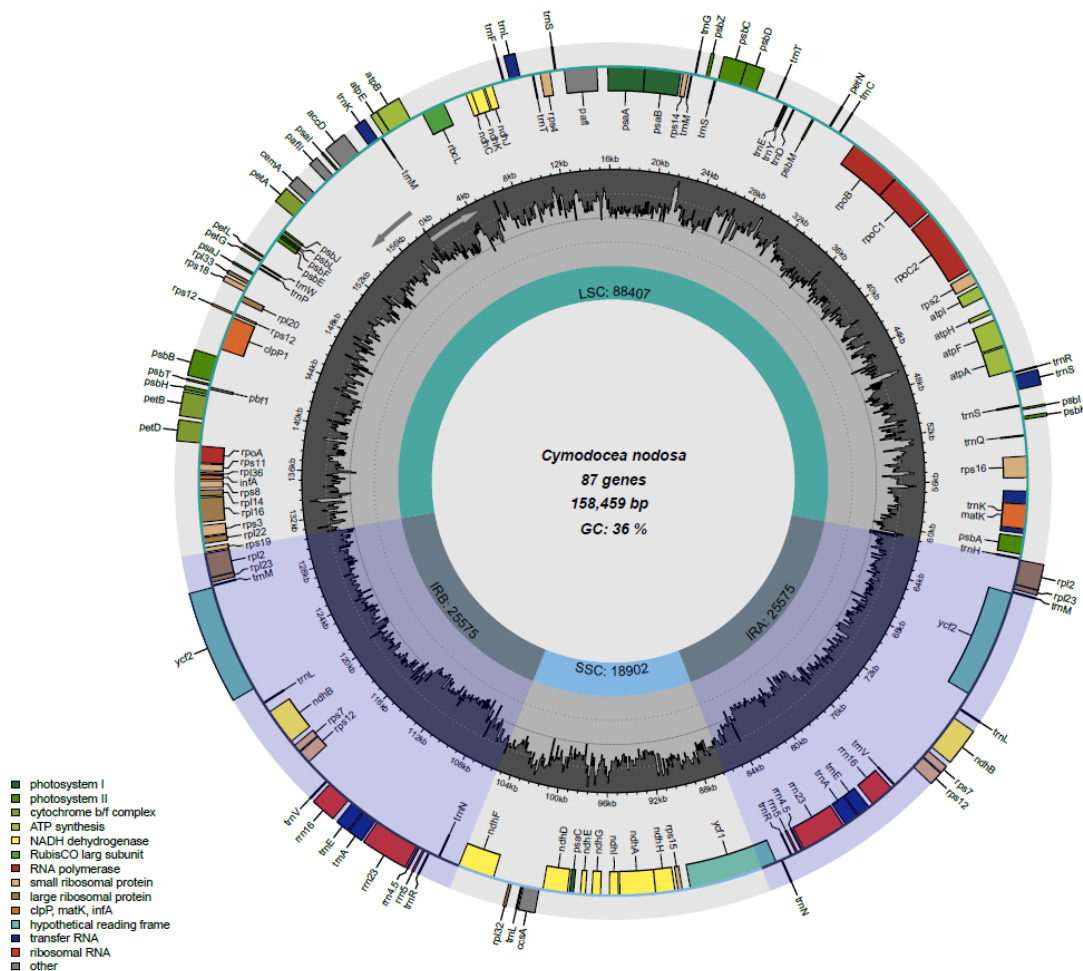

210

211 **Supplementary Figure 2.2.1 The complete *C. nodosa* chloroplast genome.**

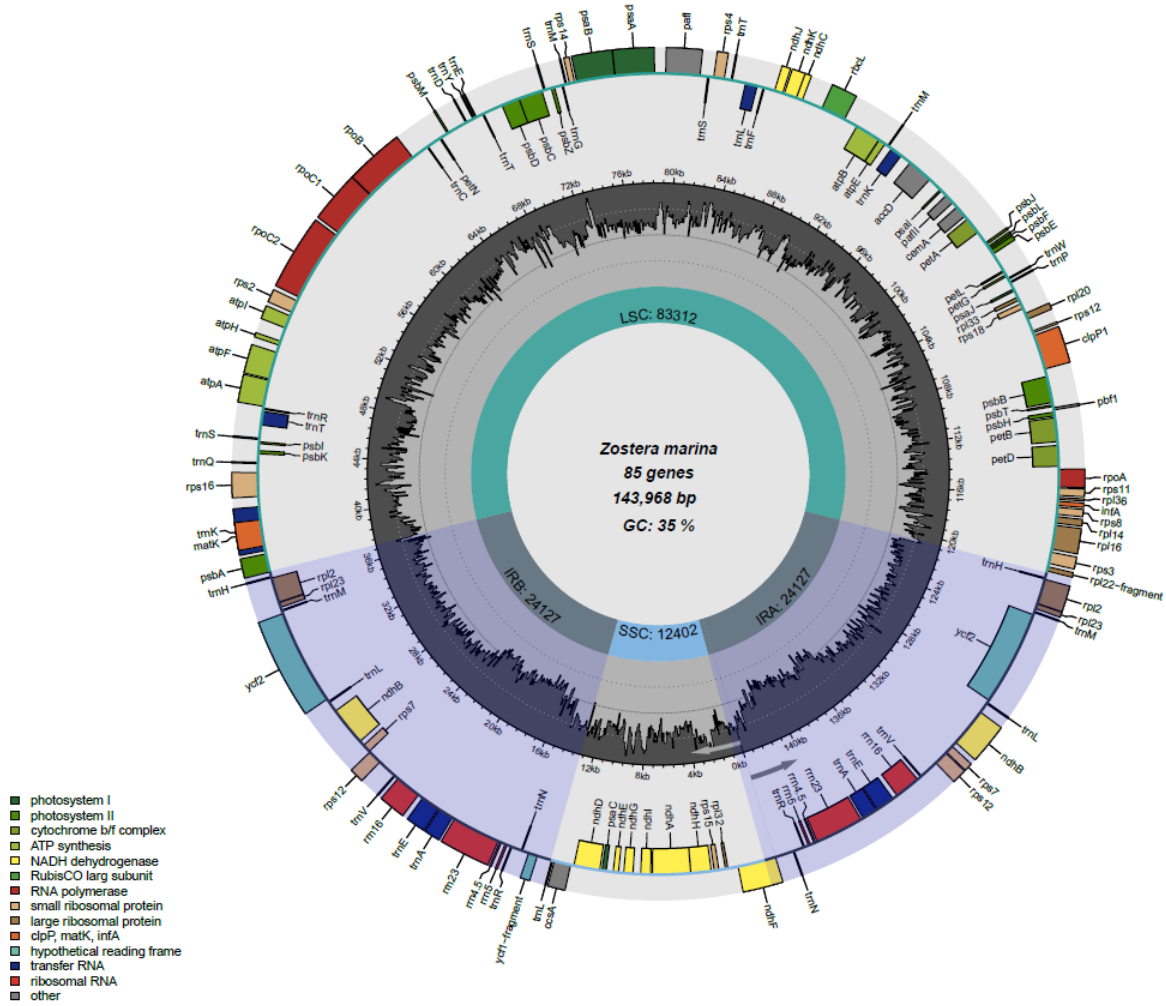

214 **Supplementary Figure 2.2.2** The complete *Z. marina* chloroplast genome.

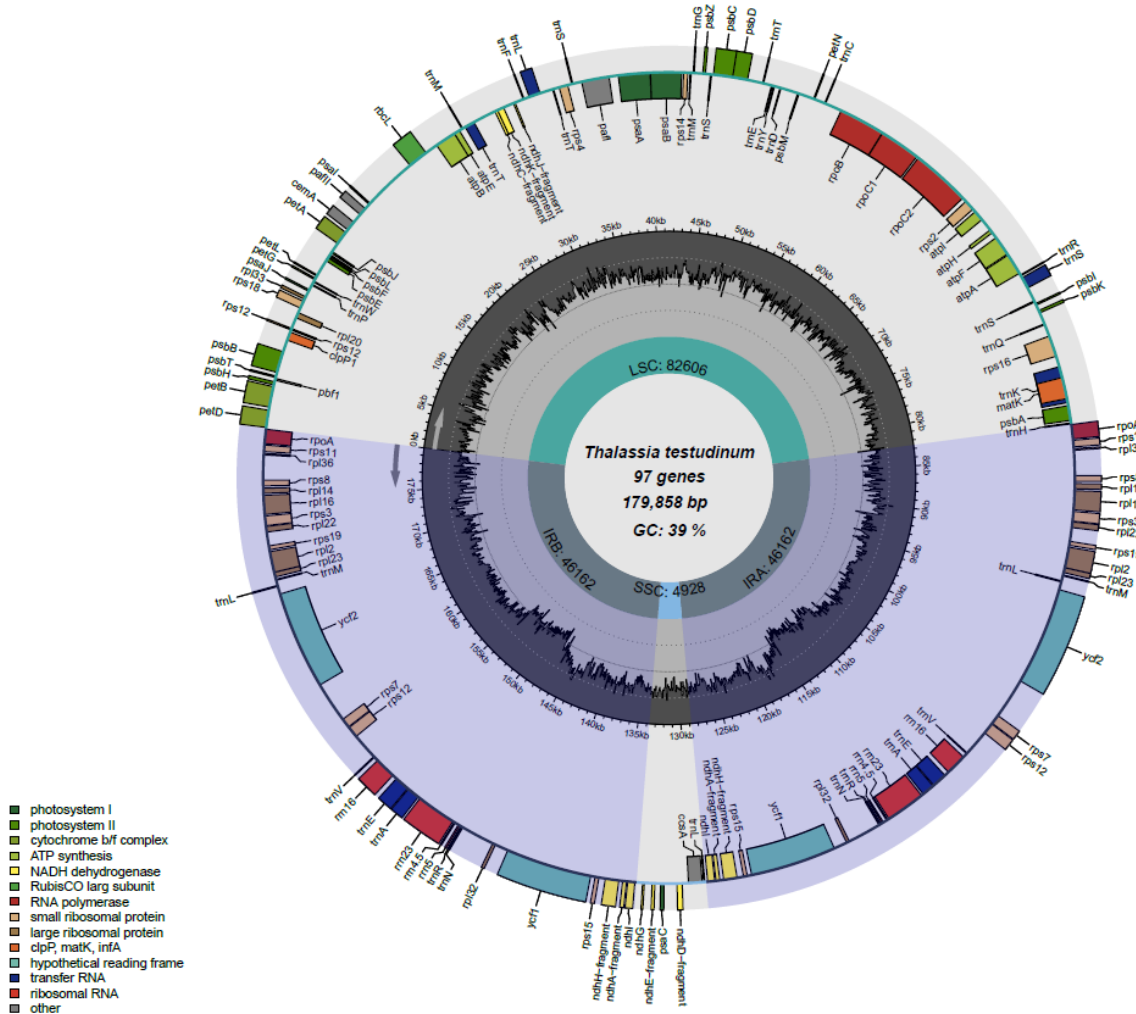

217

218 **Supplementary Figure 2.2.3** The complete *T. testudinum* chloroplast genome.

219



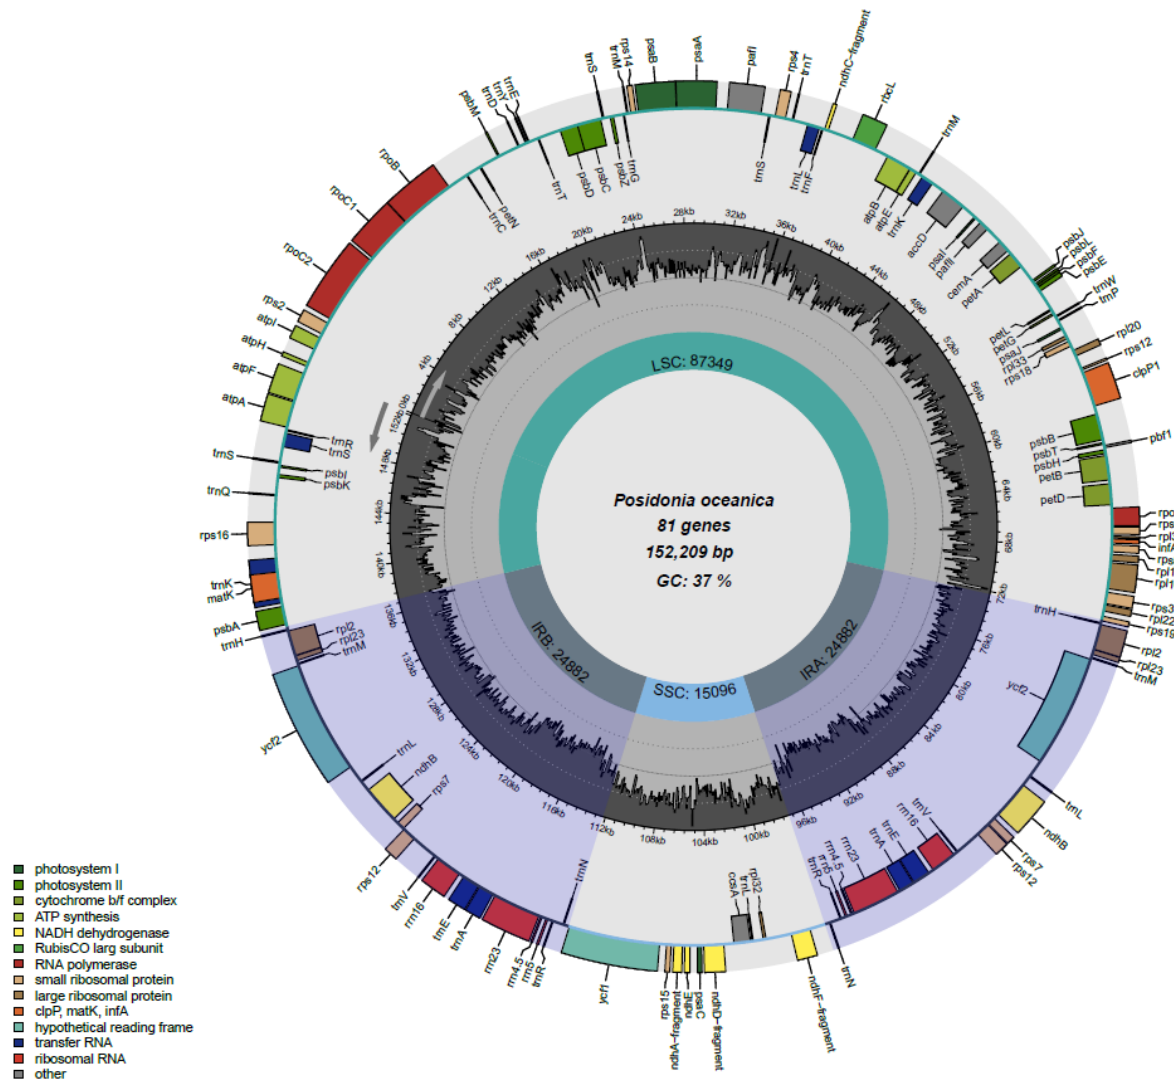

220

221 **Supplementary Figure 2.2.4** The complete *P. oceanica* chloroplast genome.

222

### 223 2.3 Mitochondrial genomes

#### 224 **Supplementary Note 2.3** Mitochondrial genome assemblies and annotations

225 Mitochondrial genomes were manually assembled de novo from PacBio contigs containing at least five  
 226 mitochondrial genes. All mitochondrial genomes were polished with pilon. Genes were identified by BLAST and  
 227 TBLASTN (Altschul et al. 1990) using the mitochondrial gene collection in (Petersen et al. 2017).

228 Unlike animal mtDNA, plant mtDNA genomes vary enormously in size and do not exist as a single stable circle  
 229 but rather as a dynamic combination of linear, branched and small circular loops called isoforms (Morley and  
 230 Nielsen 2017). The additional DNA is dominated by repeats and noncoding regions. The various isoforms are due  
 231 to recombination (Kozik et al. 2019). Therefore, the classic circular representation is inappropriate. Accordingly,  
 232 we found varying degrees of genome size, completeness, and fragmentation in the seagrass mitochondrial  
 233 genomes.

234 The *Z. marina* mitochondrial genome is complete (Marina et al. 2023) as is *C. nodosa*. *T. testudinum* is incomplete  
 235 and only a single mt-contig was recovered for *P. oceanica*.

236 The complete assembly of the *C. nodosa* mitochondrial genome resulted in one circular chromosome of 293,083  
 237 bp with two recombinationally active direct repeats of 2,683 bp and 2,476 bp. Given the possible recombination  
 238 events, the genome has six chromosomes (Supplementary Figure 2.3) All PacBio assembly contigs containing  
 239 fragments of five or more mitochondrial genes agree with at least one of the six chromosomes. In total, 36 of  
 240 44 mitochondrial protein and rRNA coding genes (or their fragments), were detected by BLAST in the assembled  
 241 genome, thus providing additional evidence of completeness.

242 The incomplete assembly of the *T. testudinum* mitochondrial genome (not shown) comprises two chromosomes  
 243 with no shared DNA between them: one circular of 192,371 bp and the other one of 136,585 bp has an open  
 244 loop shape. The open loop shape of the second chromosome is formed by an inverted repeat of 10,932 bp. At  
 245 least one additional scaffold of 90,412 bp is likely to have originated from one of the chromosomes although the  
 246 exact configuration is unclear; the scaffold has an open loop shape and overlaps with the 192,371 bp circle. The  
 247 two chromosomes were further used in the analysis. In total 30 of 44 mitochondrial protein and rRNA coding  
 248 genes (or their fragments) are encoded in the two chromosomes. However, a few additional genes detected in  
 249 other small scaffolds and in nuclear chromosomes strongly suggests that the assembly status of *T. testudinum*  
 250 mitochondrial genome remains incomplete.

251 Only a single mitochondrial contig (132,748 bp) was found for *P. oceanica* and was used for further analysis (not  
 252 shown). This contig contains 20 of 44 mitochondrial protein and rRNA coding genes (or their fragments)  
 253 confirming the fragmented status of the assembly. Additional mitochondrial genes were detected on nuclear  
 254 chromosomes.

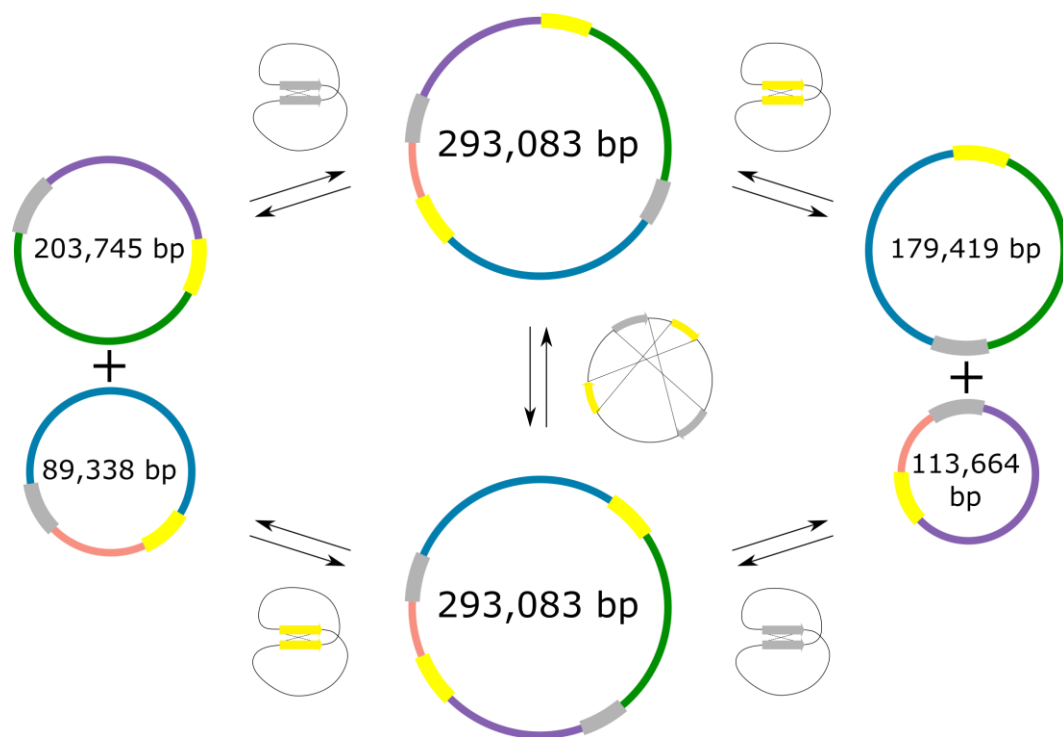

255

256 **Supplementary Figure 2.3** *C. nodosa* mitochondrial chromosomes according to genome  
 257 recombination activity.

258 See text for explanation and discussion. The two yellow and two grey segments represent two pairs of 2,683 bp  
 259 and 2,476 bp respectively. Other colored segments represent parts of the mitogenome that remain stable during  
 260 recombination. The two smaller circles (a.k.a subgenomes) are formed when one repeat pair recombines, while  
 261 the mirrored conformation is the result of recombination via both repeat pairs simultaneously.

262 **2.4 Nuclear-mitochondria and nuclear-chloroplast transfer**

263 **Supplementary Note 2.4 Nuclear-mitochondria (NUMTs) and nuclear-chloroplast (NUPTs) integrants.**

264 Nuclear-mitochondria (NUMTs) and nuclear-chloroplast (NUPTs) integrants were identified by BLAST using the  
 265 parameters suggested in (Smith et al. 2011). Shared-overlapped regions in nuclear chromosomes were joined  
 266 into “joined NUMTs” and “joined NUPTs”. Because of the repeats in organellar genomes and non-linear  
 267 organellar genome assemblies, the same chromosome region might appear multiple time in the BLAST output.  
 268 Therefore, we joined overlapping blast hits into one and called them “joined NUMTs” and “joined NUPTs”. This  
 269 way we ensure that we do not overestimate the number (and total length) of the NUMTs and NUPTs in the  
 270 nuclear chromosomes.

271 The integrated organellar DNAs within the nuclear genome have been shown to play important roles. Several  
 272 processes can enhance DNA transfer including biotic and abiotic stress, increased organelle copy number or  
 273 large gene-free regions composed of multiple repeats (Zhao et al. 2019; Ma et al. 2020; Zhang et al. 2020).

274 We assessed the intensity of intracellular DNA transfer of shared DNA segments between the nucleus and  
 275 mitochondria (NUMTs), and the nucleus and chloroplasts (NUPTs). *Thalassia testudinum* revealed large  
 276 uninterrupted NUMTs that point towards relatively recent mitochondrial-DNA transfer, whereas *Z. marina* has  
 277 very few (Supplementary Table 2.4). The recent LTR/Gypsy burst in *T. testudinum* (Supplementary Figure 4.1) is  
 278 probably the main cause for *T. testudinum*'s extreme genome size and intron expansion. It is further correlated  
 279 with increased intracellular DNA transfer from organellar to nuclear genome. Transposable elements have been  
 280 proposed to contribute to the post-insertion dynamics of the transferred DNA rather than the insertion rate  
 281 (Michalovova et al. 2013). Thus, multiple insertions of organellar DNA may be another consequence of a general  
 282 genome instability caused by TE expansion.

283 **Supplementary Table 2.4 NUMTs and NUPTs.**

284 Intracellular DNA transfer and the relative age of shared DNA segments between the nucleus and mitochondria  
 285 (NUMTs), and the nucleus and chloroplasts (NUPTs). Recent insertions are longer (e.g., *T. testudinum*). Over time,  
 286 segments become shorter (e.g., *Z. marina*).

| Species                     | Mitogenome status         | Total length | Max joined NUMT length | Mean joined NUMT length | Joined NUMT >10000bp | Percent shared positions with nucleus |
|-----------------------------|---------------------------|--------------|------------------------|-------------------------|----------------------|---------------------------------------|
| <i>Cymodocea nodosa</i>     | complete                  | 292,353      | 71,177                 | 796                     | 3                    | 59                                    |
| <i>Posidonia oceanica</i>   | fragment                  | 132,748      | 49,857                 | 880                     | 12                   | 99                                    |
| <i>Thalassia testudinum</i> | incomplete                | 328,953      | 95,806                 | 1,275                   | 108                  | 100                                   |
| <i>Zostera marina v3.1</i>  | complete                  | 187,048      | 9,623                  | 391                     | 0                    | 26                                    |
| Species                     | Chloroplast genome status | Total length | Max joined NUPT length | Mean joined NUPT length | Joined NUPT >3000bp  | Percent shared positions with nucleus |
| <i>Cymodocea nodosa</i>     | complete                  | 158,459      | 11,621                 | 387                     | 18                   | 94                                    |
| <i>Posidonia oceanica</i>   | complete                  | 152,209      | 30,959                 | 289                     | 29                   | 99                                    |
| <i>Thalassia testudinum</i> | complete                  | 180,136      | 129,692                | 527                     | 181                  | 100                                   |
| <i>Zostera marina v3.1</i>  | complete                  | 143,968      | 6,039                  | 396                     | 1                    | 44                                    |

287

## 288 3. Genome annotation

### 289 3.1 Non-protein coding RNA annotations

#### 290 **Supplementary Note 3.1** rRNA, tRNA and snoRNAs

291 The prediction of non-protein coding RNA families (i.e., rRNAs, tRNA and snoRNAs) in *Z. marina*, *C. nodosa*, *P.*  
292 *oceanica*, *T. testudinum* and *P. acutifolius* highlighted an overall expansion in the number of loci in *T. testudinum*  
293 when compared to other species (Supplementary Table 3.1). The 5S rRNA (119 nucleotides in length), the minor  
294 component of the large subunit of the ribosome, was detected in 10,923 distinct loci in the *T. testudinum*  
295 genome, and in 3,566 loci in *P. acutifolius*, 2,605 in *C. nodosa*, 730 in *P. oceanica*, and 364 in *Z. marina*. Clusters  
296 of the repetitive units of the large and small ribosomal subunits, organized by the 18S followed by the 5.8S and  
297 the 25S rRNAs, of 154, 3,401 and 1,851 nucleotides in length, respectively, were found on a single chromosome  
298 in *C. nodosa* (chr 18) and *P. oceanica* (chr 6), on three different chromosomes in *T. testudinum* (chr4, chr5 and  
299 chr8) and in different scaffolds in *Z. marina* and *P. acutifolius* (Supplementary Table 3.1 and Supplementary  
300 Figure 3.1). All the repetitive units show an almost conserved organization and the length of the two internal  
301 transcribed sequences (ITSs) within a species is conserved too, even in the repeated loci along the three different  
302 chromosomes in *T. testudinum*.

303 Of note, *C. nodosa* does not show duplications of the represented RNA families, while an evident expansion, also  
304 accompanied by the snoRNAs class, is revealed for *T. testudinum* (Supplementary Table 3.1). This expansion  
305 appears also evident in *P. acutifolius* scaffolds, although the scaffold nature of this genome did not allow to  
306 confirm the real trend. Also transfer RNA (tRNA) sequences, with a length of 71 nt, were more abundant in *T.*  
307 *testudinum* (1,200 hits) and *P. acutifolius* (4,954), compared to *C. nodosa* (228), *P. oceanica* (367), and *P.*  
308 *oceanica* (478) species. snoRNAs, the RNA class that guides chemical modifications of other rRNAs, show a strong  
309 overrepresentation in *T. testudinum* (12,846 hits), compared to the other species (224 in *P. acutifolius*, 99 in *C.*  
310 *nodosa*, 238 in *P. oceanica*, 155 in *Z. marina*), although the number of loci detected in the *P. acutifolius* are lower  
311 than *P. oceanica* (Supplementary Table 3.1). This will require deeper investigations when the *P. acutifolius*  
312 chromosomes will be defined.

313

314  
315

**Supplementary Table 3.1** Number of loci of major families of non-protein coding RNAs detected in seagrasses.

| Species                        | Genomic element | 5S     | 5.8S  | LSU_EUK(28S) | SSU_EUK(18S) | tRNA  | snoRNA |
|--------------------------------|-----------------|--------|-------|--------------|--------------|-------|--------|
| <i>Posidonia oceanica</i>      | Chr1            | 3      | -     | -            | -            | 68    | 57     |
|                                | Chr2            | 3      | -     | -            | -            | 51    | 33     |
|                                | Chr3            | 2      | -     | -            | -            | 27    | 24     |
|                                | Chr4            | -      | -     | -            | -            | 32    | 16     |
|                                | Chr5            | 18     | -     | -            | 1            | 53    | 21     |
|                                | Chr6            | -      | 160   | 155          | 153          | 43    | 19     |
|                                | Chr7            | 2      | 1     | 1            | -            | 35    | 7      |
|                                | Chr8            | 1      | -     | -            | -            | 12    | 15     |
|                                | Chr9            | 2      | -     | -            | -            | 19    | 19     |
|                                | Chr10           | 699    | 1     | 1            | -            | 20    | 25     |
|                                | Scaffolds       | -      | -     | -            | -            | 7     | 2      |
|                                | TOTAL           |        | 730   | 162          | 157          | 154   | 367    |
| <i>Cymodocea nodosa</i>        | Chr1            | 2,195  | -     | -            | 1            | 8     | 10     |
|                                | Chr2            | 17     | -     | -            | -            | 20    | 6      |
|                                | Chr3            | 21     | -     | -            | -            | 19    | 10     |
|                                | Chr4            | 20     | -     | -            | -            | 23    | 4      |
|                                | Chr5            | 15     | -     | -            | -            | 22    | 11     |
|                                | Chr6            | 18     | -     | -            | -            | 8     | 9      |
|                                | Chr7            | 17     | -     | -            | -            | 14    | 6      |
|                                | Chr8            | 19     | 1     | -            | -            | 21    | 3      |
|                                | Chr9            | 17     | -     | -            | -            | 6     | 3      |
|                                | Chr10           | 13     | -     | -            | -            | 13    | 1      |
|                                | Chr11           | 16     | -     | -            | -            | 16    | 4      |
|                                | Chr12           | 17     | -     | -            | -            | 1     | 4      |
|                                | Chr13           | 146    | -     | -            | -            | 3     | 6      |
|                                | Chr14           | 23     | -     | -            | -            | 13    | 3      |
|                                | Chr15           | 16     | -     | -            | -            | 7     | 3      |
|                                | Chr16           | 15     | -     | -            | -            | 6     | 7      |
|                                | Chr17           | 13     | -     | -            | -            | 15    | 6      |
|                                | Chr18           | 7      | 51    | 49           | 49           | 13    | 3      |
|                                | TOTAL           |        | 2,605 | 52           | 49           | 50    | 228    |
| <i>Zostera marina</i>          | Chr1            | 6      | -     | -            | 1            | 55    | 14     |
|                                | Chr2            | 5      | -     | -            | 1            | 79    | 7      |
|                                | Chr3            | 2      | -     | -            | -            | 59    | 33     |
|                                | Chr4            | 5      | 1     | 1            | -            | 48    | 39     |
|                                | Chr5            | 4      | 1     | -            | -            | 47    | 30     |
|                                | Chr6            | 1      | -     | -            | -            | 55    | 20     |
|                                | Scaffolds       | 341    | 120   | 90           | 124          | 135   | 12     |
|                                | TOTAL           |        | 364   | 122          | 91           | 126   | 478    |
| <i>Thalassia testudinum</i>    | Chr1            | 27     | -     | -            | 1            | 120   | 1,619  |
|                                | Chr2            | 41     | -     | -            | -            | 137   | 1,712  |
|                                | Chr3            | 28     | -     | -            | -            | 94    | 1,729  |
|                                | Chr4            | 33     | 74    | 73           | 73           | 126   | 1,553  |
|                                | Chr5            | 16     | 67    | 61           | 64           | 125   | 1,387  |
|                                | Chr6            | 3,435  | -     | -            | 3            | 113   | 1,459  |
|                                | Chr7            | 41     | 8     | 5            | 6            | 84    | 1,306  |
|                                | Chr8            | 7,294  | 111   | 106          | 107          | 75    | 1,189  |
|                                | Chr9            | 8      | -     | -            | -            | 40    | 885    |
|                                | Scaffolds       | -      | -     | -            | -            | 286   | 7      |
| TOTAL                          |                 | 10,923 | 260   | 245          | 254          | 1,200 | 12,846 |
| <i>Potamogeton acutifolius</i> | Scaffolds       | 3,566  | 1,548 | 1,665        | 1,693        | 4,954 | 224    |

316

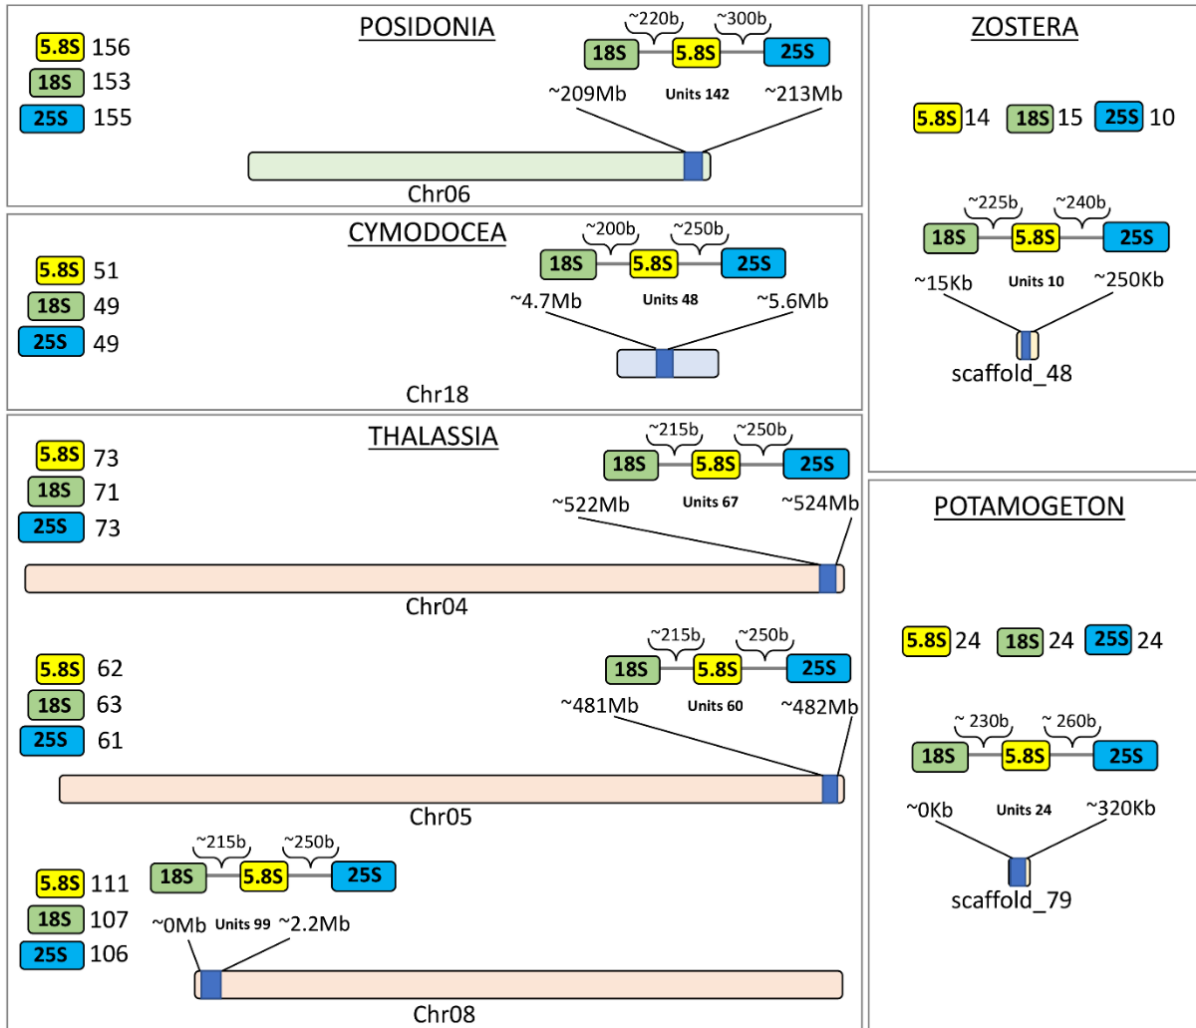

317

318 **Supplementary Figure 3.1** Organization of 18S, 5.8S and 28S rRNA repeat units and in the clusters on  
 319 seagrasses chromosomes.

320 Considering *Zostera marina* and *Potamogeton acutifolius*, the organization of the longest clusters and the  
 321 scaffold in which they have been found. The length of the ITSs and the number of repeats in a cluster (units  
 322 number) are reported.

323

324 **3.2 Transcriptome libraries, sequencing, and assembly**

325 See Methods and Supplementary Table 1.1 for RNA preparation

326 **Supplementary Note 3.2 Transcriptome libraries**

327 Strand-specific RNASeq library(s) were created and quantified by qPCR. RNA sequencing was performed using  
 328 an Illumina instrument (Supplementary Table 3.2.1 – Supplementary Table 3.2.4). Raw fastq file reads were  
 329 filtered and trimmed using the JGI QC pipeline resulting in the filtered fastq file. Using BBduk  
 330 (<https://sourceforge.net/projects/bbmap/>), raw reads were evaluated for artifact sequence by kmer matching  
 331 (kmer=25), allowing 1 mismatch and detected artifact was trimmed from the 3' end of the reads. RNA spike-in  
 332 reads, PhiX reads and reads containing any Ns were removed. Quality trimming was performed using the phred  
 333 trimming method set at Q6. Finally, following trimming, reads under the length threshold were removed  
 334 (minimum length 25 bases or 1/3 of the original read length - whichever is longer).

335 **Supplementary Table 3.2.1 Transcriptome sequencing data for *Thalassia testudinum***

|                                                         | Sequencing           | Tissue     | library ID | Replicate  | Number of raw Reads | Number of clean Reads           | Number of mapped reads          | % of aligned reads      |
|---------------------------------------------------------|----------------------|------------|------------|------------|---------------------|---------------------------------|---------------------------------|-------------------------|
| Summary of transcriptome sequencing in <i>Thalassia</i> | RNA-seq (NovaSeq S4) | Rhizome    | GZGXW      | 1          | 121,598,766         | 118,237,066                     | 114,398,701                     | 96.75                   |
|                                                         |                      |            | GZGXX      | 2          | 73,636,900          | 70,598,156                      | 67,892,538                      | 96.17                   |
|                                                         |                      |            | GZGXY      | 3          | 132,873,546         | 129,273,100                     | 124,854,697                     | 96.58                   |
|                                                         |                      | Leaf       | GZGXT      | 1          | 93,743,754          | 90,902,870                      | 87,180,663                      | 95.91                   |
|                                                         |                      |            | GZGXU      | 2          | 62,515,064          | 61,189,816                      | 58,999,410                      | 96.42                   |
|                                                         |                      | Sequencing | Tissue     | library ID | Replicate           | Number of full-length ccs reads | Number of high-quality isoforms | Number of mapping reads |
|                                                         | Iso-seq (SEQUELII)   | Leaf       | GYNYG      | 1          | 3,645,896           | 217,994                         | 347,411                         | 98.4                    |
|                                                         |                      |            | GYNYH      | 2          | 3,267,856           | 135,187                         |                                 |                         |
|                                                         |                      | Rhizome    | GNYNO      | 1          | 3,002,957           | 177,124                         | 351,956                         | 99.1                    |
|                                                         |                      |            | GNYNY      | 2          | 2,801,968           | 178,044                         |                                 |                         |

336

Supplementary Table 3.2.2 Transcriptome sequencing data for *Posidonia oceanica*

|                                                         | Sequencing           | Tissue  | library ID | Replicate | Number of raw Reads             | Number of clean Reads           | Number of mapping reads | % of aligned reads |
|---------------------------------------------------------|----------------------|---------|------------|-----------|---------------------------------|---------------------------------|-------------------------|--------------------|
| Summary of transcriptome sequencing in <i>Posidonia</i> | RNA-seq (NovaSeq S4) | Leaf    | GZGXH      | 1         | 118,219,220                     | 110,207,116                     | 106,925,423             | 97.02              |
|                                                         |                      |         | GYOZB      | 2         | 103,334,962                     | 89,188,206                      | 85,643,795              | 96.03              |
|                                                         |                      |         | GZGXN      | 3         | 112,093,828                     | 106,876,636                     | 103,508,597             | 96.85              |
|                                                         |                      | Rhizome | GZGXO      | 1         | 90,749,690                      | 87,505,084                      | 84,244,810              | 96.27              |
|                                                         |                      |         | GZGXP      | 2         | 97,902,404                      | 95,308,522                      | 92,137,451              | 96.67              |
|                                                         | Sequencing           | Tissue  | library ID | Replicate | Number of full-length ccs reads | Number of high-quality isoforms | Number of mapping reads | % of aligned reads |
|                                                         | Iso-seq (SEQUELII)   | Leaf    | GZHTC      | 1         | 1,852,186                       | 93,731                          | 265,793                 | 99.7               |
|                                                         |                      |         | GZHTB      | 2         | 2,542,984                       | 172,871                         |                         |                    |
|                                                         |                      | Rhizome | GZHTH      | 1         | 2,525,643                       | 183,914                         | 335,745                 | 99.6               |
|                                                         |                      |         | GZHTG      | 2         | 1,941,033                       | 152,859                         |                         |                    |

Supplementary Table 3.2.3 Transcriptome sequencing data for *Cymodocea nodosa*

|                                                         | Sequencing           | Tissue                                 | library ID | Replicate | Number of raw Reads             | Number of clean Reads           | Number of mapping reads | % of aligned reads |
|---------------------------------------------------------|----------------------|----------------------------------------|------------|-----------|---------------------------------|---------------------------------|-------------------------|--------------------|
| Summary of transcriptome sequencing in <i>Cymodocea</i> | RNA-seq (NovaSeq S4) | Leaf                                   | GZGWX      | 1         | 229,014,654                     | 221,616,172                     | 215,735,219             | 97.35              |
|                                                         |                      |                                        | GZGWY      | 2         | 85,687,350                      | 81,851,552                      | 78,999,864              | 96.52              |
|                                                         |                      | Rhizome                                | GZGWZ      | 1         | 152,179,412                     | 142,836,610                     | 138,185,544             | 96.74              |
|                                                         |                      | Root                                   | GZGXA      | 1         | 77,449,636                      | 75,252,242                      | 72,717,889              | 96.63              |
|                                                         |                      |                                        | GZGXB      | 2         | 103,516,046                     | 102,007,494                     | 99,073,508              | 97.12              |
|                                                         |                      | Flower                                 | GZGXC      | 1         | 167,193,082                     | 157,226,850                     | 153,290,632             | 97.50              |
|                                                         |                      |                                        | GZGXC      | 2         | 170,015,134                     | 160,442,432                     | 156,397,982             | 97.48              |
|                                                         | Sequencing           | Tissue                                 | library ID | Replicate | Number of full-length ccs reads | Number of high-quality isoforms | Number of mapping reads | % of aligned reads |
|                                                         | Iso-seq (SEQUELII)   | Mixed pool of Rhizome, root and flower | GWWWG      | 1         | 1,103,846                       | 130,315                         | 568,012                 | 98.5               |
|                                                         |                      |                                        | GWWWG      | 2         | 2,318,964                       | 171,811                         |                         |                    |
|                                                         |                      | Leaf                                   | GZHTN      | 1         | 2,102,451                       | 157,082                         | 117,547                 |                    |
|                                                         |                      |                                        | GZHTO      | 2         | 1,982,756                       | 117,547                         |                         |                    |



340

**Supplementary Table 3.2.4** Transcriptome sequencing data for *Potamogeton acutifolius*.

|                                                           | Sequencing                | Tissue | library ID | Replicate | Number of raw reads | Number of clean reads | Number of mapping reads | % of aligned reads |
|-----------------------------------------------------------|---------------------------|--------|------------|-----------|---------------------|-----------------------|-------------------------|--------------------|
| Summary of transcriptome sequencing in <i>Potamogeton</i> | RNA-seq (NovaSeq 6000 S4) | Leaf   | PALF       | 1         | 85,063,302          | 85,063,302            | 35,512,097              | 41.7               |
|                                                           |                           | Root   | PARO       | 1         | 68,366,930          | 68,366,930            | 35,807,278              | 52.4               |
|                                                           |                           | Turion | PATU       | 1         | 64,107,268          | 64,107,268            | 56,978,015              | 88.9               |

341

342 4. Genome Evolution

343 4.1 Transposable elements

344 **Supplementary Table 4.1** Statistics on transposable elements (TE).

| TE Statistics          | <i>T. testudinum</i> | <i>P. oceanica</i> | <i>C. nodosa</i> | <i>Z. marina</i> | <i>P. acutifolius</i> |
|------------------------|----------------------|--------------------|------------------|------------------|-----------------------|
| Overall TE content (%) | 87.36                | 85.18              | 64.65            | 65.57            | 40.76                 |
| Overall LTR (%)        | 72.27                | 65.89              | 45.72            | 41.72            | 12.41                 |
| LTR/Gypsy (%)          | 63.18                | 57.8               | 17.43            | 32.11            | 3.39                  |
| LTR/Copia (%)          | 8.28                 | 4.09               | 28.29            | 9.49             | 6.11                  |
| LINE (%)               | 5.06                 | 2.63               | 2.38             | 4.05             | 0.59                  |
| SINE (%)               | 0.03                 | 0.23               | 0.00             | 0.09             | 0.23                  |
| DNA transposon (%)     | 7.78                 | 8.39               | 2.93             | 5.71             | 7.14                  |
| Unclassified (%)       | 2.21                 | 2.76               | 13.61            | 14.00            | 18.95                 |

345

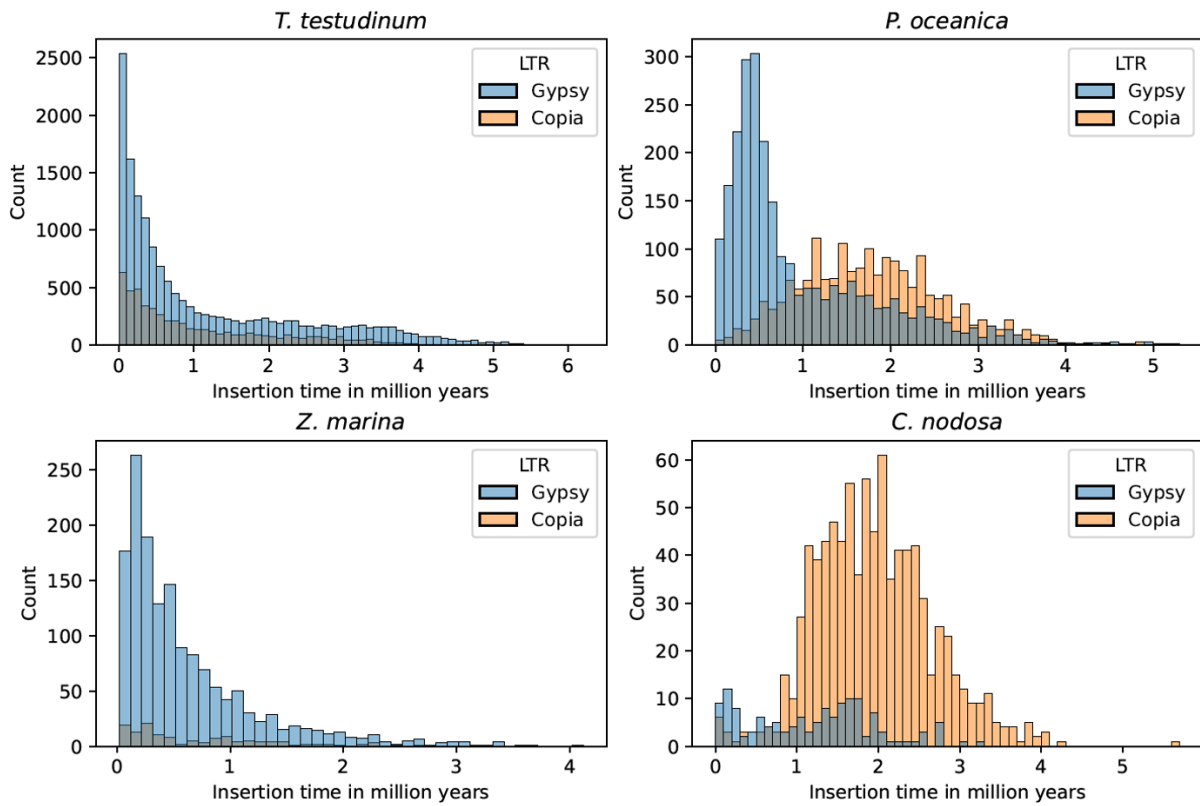

**Supplementary Figure 4.1** Insertion time distributions of LTR/Gypsy and LTR/Copia in *T. testudinum*, *P. oceanica*, *C. nodosa* and *Z. marina*. Note differences in the scale of the y-axis. See main text for details.

346

## 347 4.2 Identifying Whole Genome Duplications (WGD)

### 348 **Supplementary Note 4.2.1** $K_s$ age distributions

349  $K_s$  age distribution analysis was performed using the wgd package (Zwaenepoel and Van de Peer 2019b). The  
350 paranome (the entire collection of duplicated genes) was obtained with 'wgd mcl' using all-against-all BlastP and  
351 MCL clustering. Anchor pairs (i.e., paralogous genes lying in collinear or syntenic regions of the genome) were  
352 obtained using i-ADHoRe (Simillion et al. 2008), employing the default settings in 'wgd syn'.  $K_s$  distribution  
353 analysis was also performed using the KSRATES software (Sensalari et al. 2021), which locates ancient  
354 polyploidization events with respect to speciation events within a phylogeny. It compares paralog and ortholog  
355  $K_s$  distributions, while correcting for substitution rate differences across the involved lineages. First, an all-  
356 versus-all amino acid level similarity search for the set of protein-coding sequences was conducted using BLAST  
357 (v2.6.0+) with an E-value cut-off of  $1e-10$ . The resulting sequence similarity graph was clustered by the Markov  
358 clustering algorithm mcl (v10-201) (Dongen 2008) with default inflation factor to identify the paralogous gene  
359 families. Second, a codon-level, multiple sequence alignment (MSA) was obtained by inferring an amino acid  
360 MSA using the MUSCLE (v3.8.31) (Edgar 2004) under default parameters, which was then back-translated to a  
361 codon-level nucleotide MSA. The gene families which had >200 members or an MSA length less <100 amino  
362 acids were filtered out. A maximum likelihood estimate of each gene pair in the family (for the pairwise  
363 synonymous distance ( $K_s$ )) was obtained using the CODEML program or the PAML (Yang 2007b) package (v4.9j).  
364 Third, an estimate of the phylogenetic tree topology of each paralogous gene family was obtained using Fasttree  
365 (v2.1.7) (Price et al. 2010) and rooted using midpoint rooting.

366 The most recent common ancestor (MRCA) node depth, of each gene pair, was associated with the pairwise  $K_s$   
367 estimate as a weight, in which for each duplication node in the phylogenetic tree, all  $n$  pairwise  $K_s$  estimates of  
368 the descendant clades were added to the  $K_s$  distribution with a weight of  $1/n$  to reduce redundancy. The  $K_s$   
369 ortholog age distributions were based on the one-to-one orthologs (reciprocal best hits) between two species  
370 using BLAST (v2.6.0+) with an E-value cut-off of  $1e-10$  following the same  $K_s$  estimation process as for the  
371 paranome age distributions. The substitution rate correction across different species was achieved as follows:  
372 1) The original divergence times between the focal species and the other species (represented as  $K_s$  distance)  
373 were obtained by the mode of the ortholog  $K_s$  distributions using bootstrapped kernel density estimation; 2) A  
374 substitution-rate-adjusted  $K_s$  estimate was calculated by transforming the original  $K_s$  distance into branch-  
375 specific  $K_s$  distance using the reference of outgroup species and then rescaling the  $K_s$  distance with the diverged  
376 species into the  $K_s$  timescale of the focal species for each divergence event. The corrected divergence times in  
377  $K_s$  timescale were then compared with the paranome  $K_s$  distribution of focal species after above processes. The  
378 maximum number of outgroup species/trios selected to correct each divergent species pair was set as 6 and the  
379 consensus peak for multiple outgroups was set as best outgroup in KSRATES. Other parameters were set as  
380 default for rate correction using KSRATES. The species tree adopted consists of *Thalassia testudinum*,  
381 *Cymodocea nodosa*, *Posidonia oceanica*, *Potamogeton acutifolius*, *Zostera marina*, *Spirodela polyrhiza*, *Wolffia*  
382 *Australiana*, with *Brachypodium distachyon* and *Oryza sativa* as outgroup species, covering all the four families  
383 of seagrasses (Posidoniaceae, Zosteraceae, Hydrocharitaceae and Cymodoceaceae).

384 The syntenic analysis was performed by MCscan (Python version) with default parameters (Tang et al. 2008).  
385 Collinear blocks containing fewer than five orthologous gene pairs were filtered out. The collinearity information  
386 of the gene set and other genomic features in the seagrass's genomes were visualized by Tbtools and  
387 Circos (Krzywinski et al. 2009; Chen et al. 2020).

388

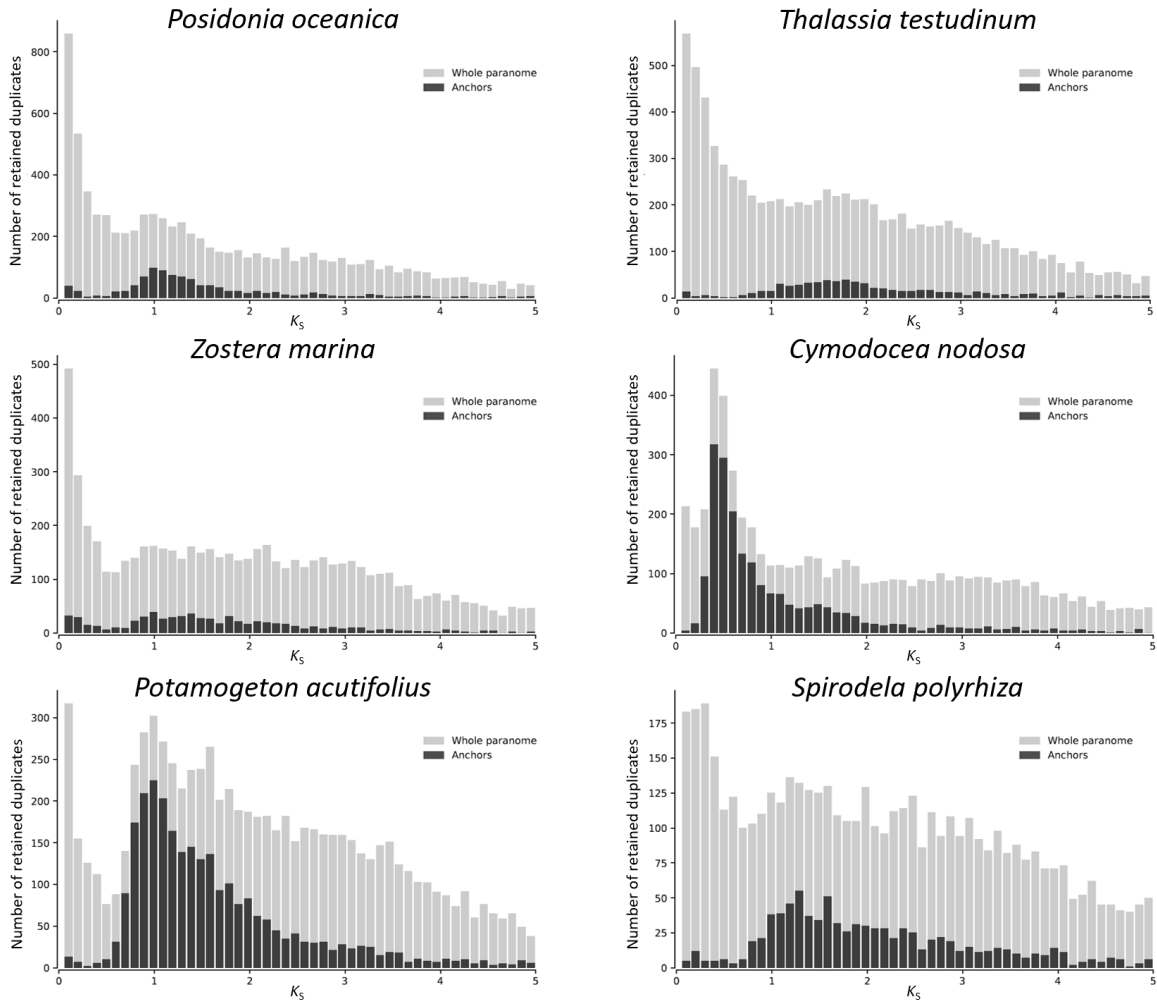

**Supplementary Figure 4.2.1**  $K_s$  distributions for anchor pair duplicates (duplicates laying in duplicated, colinear blocks) and the whole paranome of four seagrasses, as well as for *P. acutifolius* and *S. polyrhiza*, generated by the wgd software (see Methods).

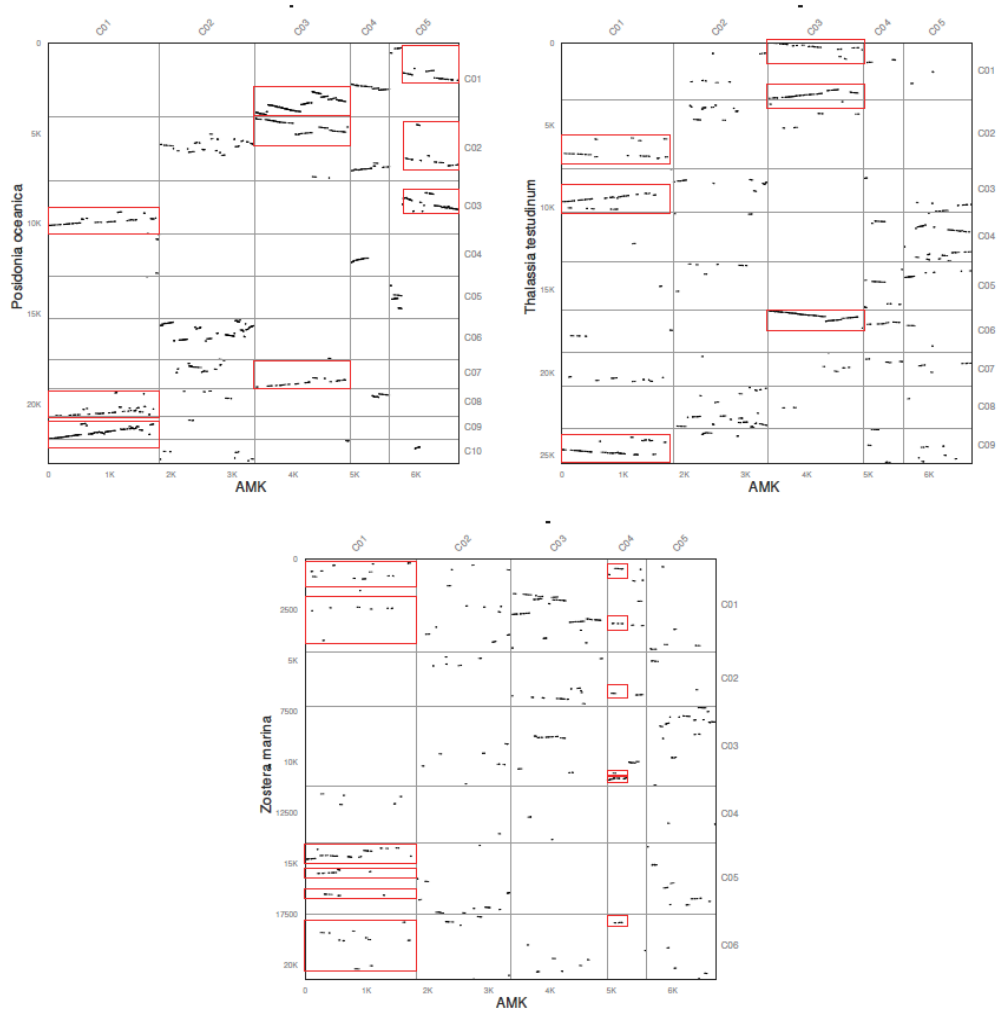

**Supplementary Figure 4.2.2** Comparison of *Z. marina*, *P. oceanica*, and *T. testudinum* with a reconstructed ancestral monocot karyotype (AMK) (Murat et al. 2017).

Comparison between the AMK and *P. oceanica*, *T. testudinum* shows a clear 1:3 relationship, while the dot plot between the AMK and *Z. marina* shows a probable 1:6 relationship.

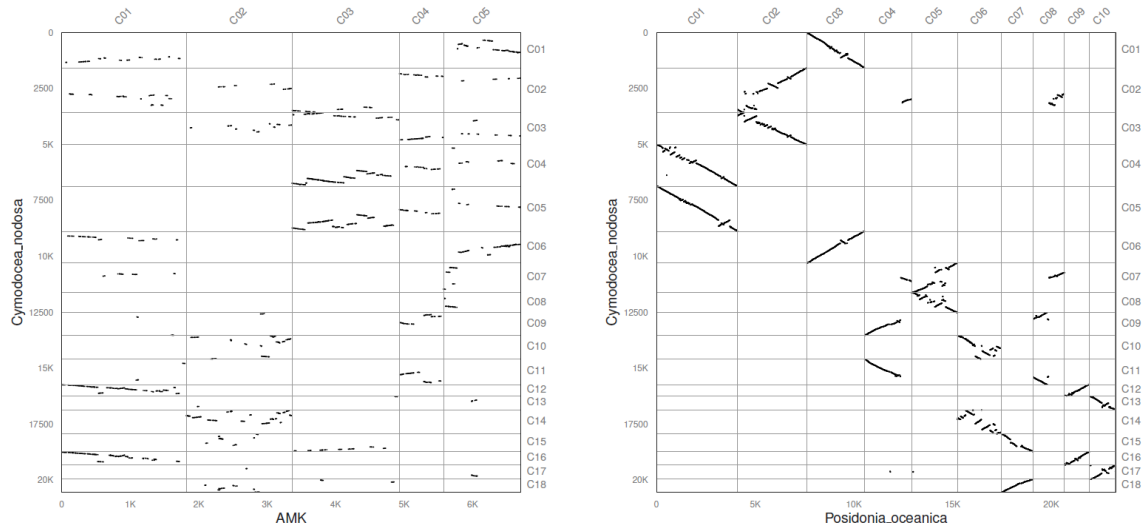

**Supplementary Figure 4.2.3** Comparison of the ancestral monocot karyotype (AMK) (Murat et al. 2017) with *C. nodosa* and comparison of *P. oceanica* and *C. nodosa*.

Comparison between the AMK and *C. nodosa* shows a 1:6 synteny relationship. Comparison of *P. oceanica* and *C. nodosa* shows a 1:2 synteny relationship. This supports an extra WGD in *C. nodosa*, after its divergence with *P. oceanica*.

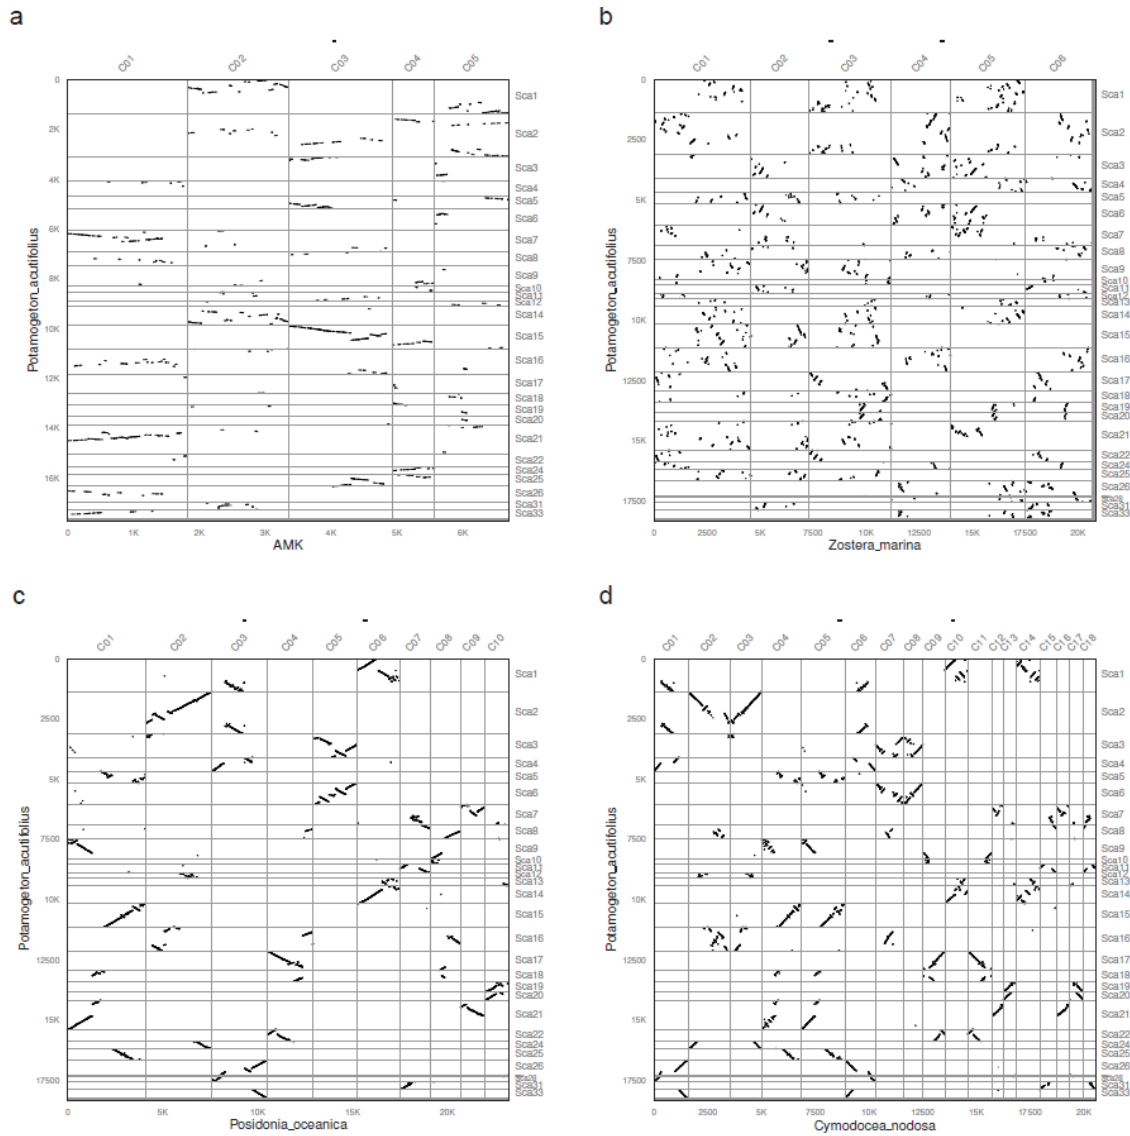

**Supplementary Figure 4.2.4** Comparison of *P. acutifolius* with the ancestral monocot karyotype (AMK) (Murat et al. 2017), *Z. marina*, *P. oceanica*, and *C. nodosa*, respectively.

a) Comparison between *P. acutifolius* and the AMK shows a 1:6 syntenic relationship. B) Comparison of *P. acutifolius* and *Z. marina* and shows a non-obvious syntenic relationship c) *P. acutifolius* shows a 2:1 relationship with *P. oceanica*. D) *P. acutifolius* shows a 2:2 relationship with *C. nodosa*. See text for details.

397

398

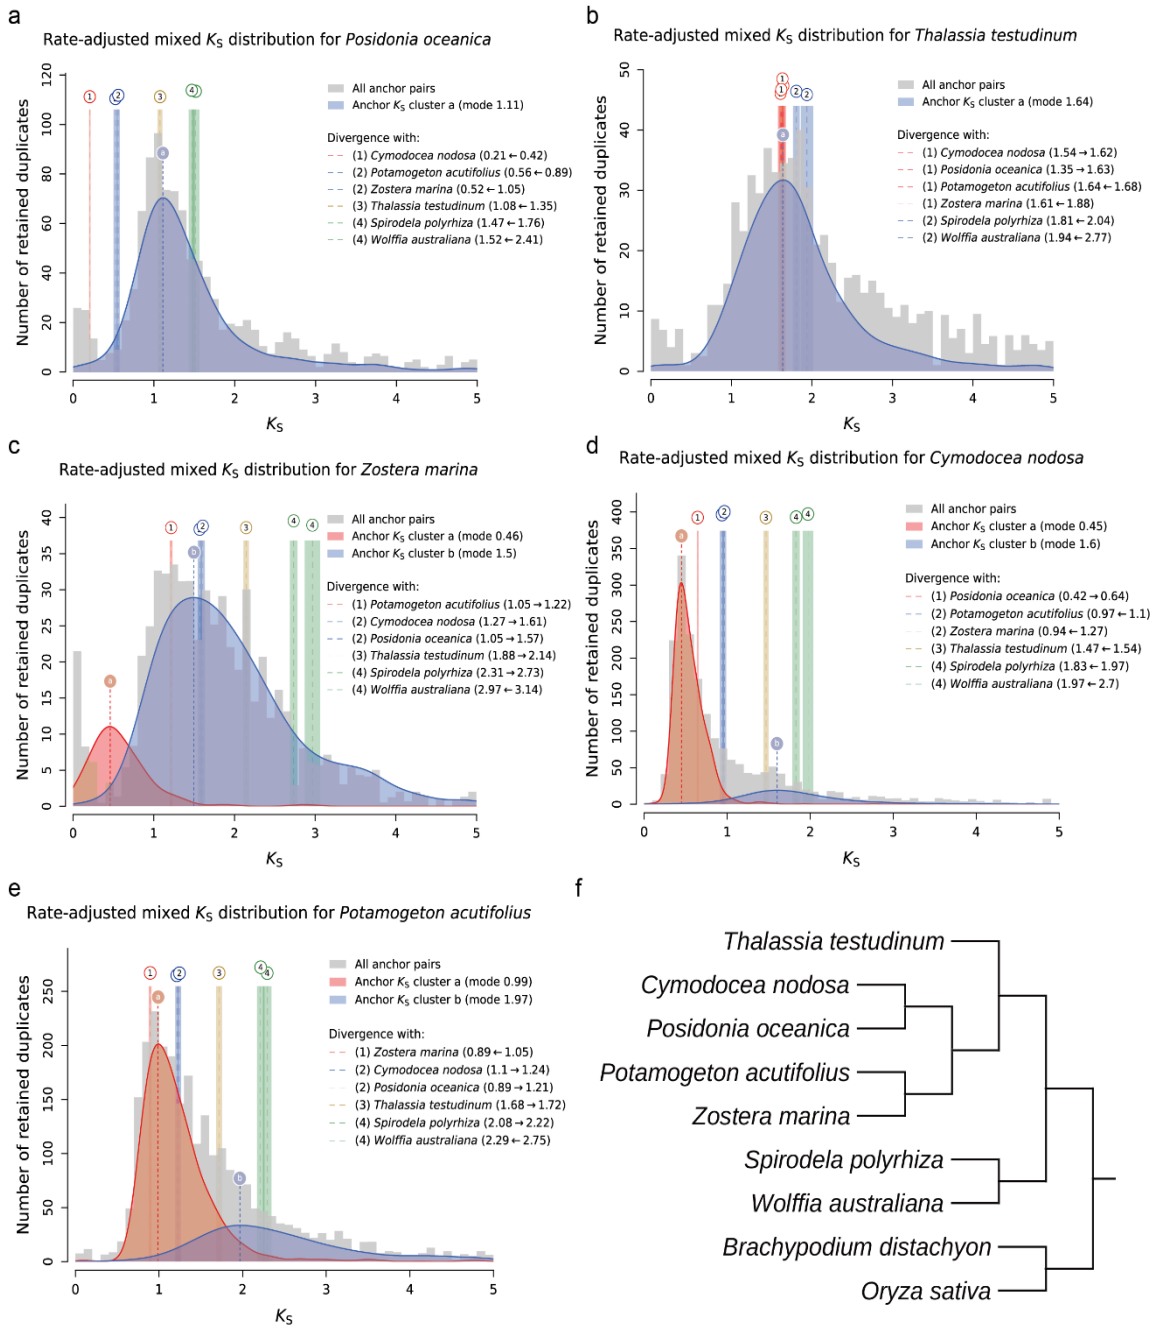

**Supplementary Figure 4.2.5**  $K_S$  Distributions for paralogs and the whole panome of four seagrasses and *P. acutifolius* generated by KSRATES software.

a – e,  $K_S$  distributions in *P. oceanica*, *T. testudinum*, *Z. marina*, *C. nodosa* and *P. acutifolius*. F, topology used in KSRATES analysis.

399

400



#### 401 **Supplementary Note 4.2.2 Gene tree-species tree reconciliation**

402 OrthoFinder (Emms and Kelly 2019) (v2.3.3) was used to build orthologous gene families with the inflation factor  
403 set to 3.0 and the remaining parameters set as default. Gene families that did not have at least one gene from  
404 both clades at the root or have a family size exceeding 2 times the median of the square root of the family size,  
405 based on a Poisson outlier criterion, were filtered out (Zwaenepoel and Van de Peer 2019a). An amino acid,  
406 multiply sequence alignment (MSA) was obtained using PRANK (Loytynoja and Goldman 2005) for each gene  
407 family and the resulting MSA was then used as input for the Markov Chain Monte Carlo (MCMC) analysis in  
408 mrbayes (Huelsenbeck and Ronquist 2001) (v3.2.6) to sample from the posterior probability distribution. The  
409 rate matrix for amino acid data (Aamodelpr) was set to a fixed (LG) and the rate was set as gamma-distributed  
410 approximating four rate categories. The sampling frequency was set to 10 and the number of generations was  
411 set to 110,000 to reach a total of 11,000 posterior samples. The ALExamine (Szöllösi et al. 2013) was then used  
412 to construct the conditional clade distribution (CCD) containing marginal clade frequencies with a 'burn-in' of  
413 1000, based on the 11,000 posterior samples for each gene family. The topology of the species tree was set as  
414 shown in Figure 3). The time-calibrated species tree was inferred by MCMCtree from the PAML package (Yang  
415 2007a), using reference divergence times of 42-52 million years ago (MYA) for the most common ancestor of  
416 *Oryzae sativa* and *Brachypodium distachyon*, 118-129 MYA for that between *Spirodela polyrhiza* and *Zostera*  
417 *marina* and 130-140 for that between *Spirodela* and other terrestrial monocots (An et al. 2019).

418 The duplication-loss (DL)+WGD model, under critical and relaxed branch-specific rates, was implemented for the  
419 inference of the significance and corresponding retention rates of the assumed WGD events under Bayesian  
420 inference (BI) (Zwaenepoel and Van de Peer 2019a). In the critical-branch-specific DL+WGD model, the prior  $\eta$ ,  
421 which denotes the parameter of the geometric prior distribution on the number of genes at the root, was set to  
422 follow a truncated-univariate-Beta distribution with shape parameters as (3,1) in the interval [0.01, 0.99]; the  
423 prior  $r$ , which denotes the mean of the branch rates distribution, was set to follow a flat distribution; the prior  
424  $\sigma$ , which denotes the deviation of the branch rates distribution, was set to follow an exponential distribution  
425 with scale 0.1,  $\lambda$  (which denotes the duplication rate of each branch) was set to follow a multivariate normal  
426 distribution. For each branch, the loss rate  $\mu$  was set to be equal to  $\lambda$ , while in the relaxed branch specific model,  
427  $\lambda$  and  $\mu$  were independent with the rates variation parameter  $\tau$  set to follow an exponential distribution with  
428 scale 1 (Zwaenepoel and Van de Peer 2019a). To estimate duplication and loss rate  $\lambda$  and  $\mu$  per branch  
429 incorporating both small-scale gene duplications and WGDs, another model without WGD nodes where all  
430 branch lengths were set as 1, the prior  $\eta$  was set to follow a Beta distribution with shape as (3,1) and the  
431 duplication and loss rate were set respectively to follow a normal distribution with mean as 0 and standard  
432 deviation as 5 were implemented. The Bayes Factor was calculated using the "bfact.jl" script within the public  
433 github repository of WHALE to measure the strength of evidence in favor of the assumed WGD models using the  
434 Savage-Dickey density ratio.

435 In total, 9 WGD(T) models were set on the branches leading to the MRCA of Potamogetonaceae, Zosteraceae,  
436 Posidoniaceae, Cymodoceaceae and Hydrocharitaceae (labelled as WGD1 or WGT1), the MRCA of  
437 Potamogetonaceae, Zosteraceae, Posidoniaceae and Cymodoceaceae (WGD2 or WGT2), the *C. nodosa* lineage  
438 (WGD3), the *P. acutifolius* lineage (WGD4), the *T. testudinum* lineage (WGD5 or WGT5), the MRCA of *S. polyrhiza*  
439 and *W. australiana* (WGD6), the *S. polyrhiza* lineage (WGD7), the *W. australiana* lineage (WGD8), the MRCA of  
440 *B. distachyon* and *O. sativa* (WGD9), respectively (Supplementary Figure 4.2.6). Posterior mean of duplication  
441 (left) and loss (right) rates estimated under DL+WGD modelling colored on the time-calibrated species tree. In  
442 the left panel, green squares indicate the significantly supported WGDs under the relaxed branch-specific model  
443 while empty squares indicate the WGDs that are not significantly supported under the relaxed branch-specific  
444 model. In the right panel, light green squares indicate the significantly supported WGDs under the critical  
445 branch-specific model while empty squares indicate the WGDs that are not significantly supported under the  
446 critical branch-specific model.

447

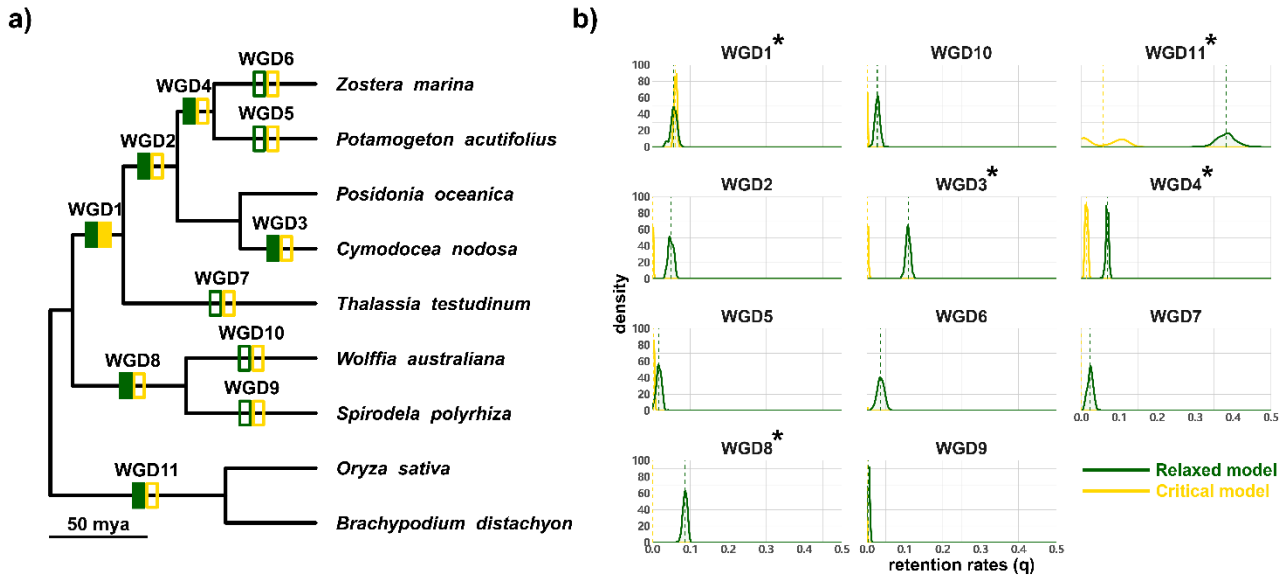

**Supplementary Figure 4.2.6** Bayesian inference of retention rates ( $q$ ) of 11 hypothetical WGD models in WHALE (Zwaenepoel and Van de Peer 2019a).

a) Summary representation of the support from ‘relaxed’ and ‘critical’ models on a ‘divergence time tree’, in which filled rectangles denote support in terms of Bayes Factor, while outlined rectangles denote lack of support. The green rectangles show the results from the relaxed model, while the yellow rectangles show the results using the critical model. B) Posterior distribution of retention rates of the 11 hypothetical WGD models. Model categories follow the same color code as in a). Hypothetical WGD models which gained significant support and ‘accepted’ in this study are marked with asterisks.

448

449

### 450 **Supplementary Note 4.2.3 Absolute dating of WGDs**

451 Absolute dating of WGD events was done as described previously described for *Zostera marina* (Olsen et al.  
452 2016). Paralogous gene pairs located in duplicated segments (so called anchors) and duplicated pairs lying under  
453 the WGD peak (so-called peak-based duplicates) were collected for phylogenetic dating. Anchors, which are  
454 assumed to correspond to the most recent WGD, were detected using i-ADHoRe 3.0 (Simillion et al. 2008). For  
455 each WGD paralogous pair, an orthogroup was created that included the two paralogues plus several  
456 orthologues from other plant species, as identified by InParanoid (v4.1), using a broad taxonomic sampling, i.e.,  
457 one representative from the order Cucurbitales, two from the Rosales, two from the Fabales, two from the  
458 Malpighiales, two from the Brassicales, one from the Malvales, one from the Solanales, two from the Poales,  
459 one orthologue from *Musa acuminata* (Zingiberales), and one orthologue from *Spirodela polyrhiza* (Alismatales).  
460 WGT/WGD paralogues were then dated using the BEAST v1.7 package under an uncorrelated relaxed clock  
461 model with the LG+G (four rate categories) evolutionary model. A starting tree with branch lengths satisfying all  
462 fossil-prior-constraints was created according to the consensus APGIII phylogeny. Fossil calibrations were  
463 implemented using log-normal calibration priors on the following nodes: the node uniting the Malvaceae based  
464 on the fossil *Dressiantha bicarpellate* (Gandolfo et al. 1998) with prior offset = 82.8, mean = 3.8528, and s.d. =  
465 0.5), the node uniting the Fabaceae based on the fossil *Paleoclusia chevalieri* (Crepet and Nixon 1998) with prior  
466 offset = 82.8, mean = 3.9314, and s.d. = 0.5, the node uniting the Alismatales (including *Zostera marina* and  
467 *Spirodela polyrhiza*) with the other monocots based on the oldest fossil monocot pollen, *Liliacidites* (Doyle et al.  
468 2008; Iles et al. 2015) from the Trent's Reach locality, with prior offset = 125, mean = 2.0418, and s.d. = 0.5  
469 (Janssen and Bremer 2004; Nauheimer et al. 2012) and the root with prior offset = 124, mean = 4.0786, and s.d.  
470 = 0.5 (Smith et al. 2010). A run without data was performed to ensure proper placement of the marginal  
471 calibration prior distributions. The Markov chain Monte Carlo (MCMC) for each orthogroup was run for  $10^7$   
472 generations, sampling every 1,000 generations, resulting in a sample size of  $10^4$ . The resulting trace files of all  
473 orthogroups were evaluated manually using Tracer v1.570 with a burn-in of 1,000 samples to ensure proper  
474 convergence (minimum ESS for all statistics at least 200). To resolve the absolute dates of other involved WGDs  
475 in our analysis (Figure 2), we also redated the WGDs of *Elaeis guineensis*, *Asparagus officinalis*, *Rhizophora*  
476 *apiculata*, *Avicennia marina* and *Utricularia gibba* using the same pipeline as above. Moreover, the fossil of  
477 *Sabalites carolinensis* (Berry 1914) were also chosen as calibrations as previous study (Vanneste et al. 2014). The  
478 final WGD dates were shown in Supplementary Table 4.2 and Supplementary Figure 4.2.8.

479

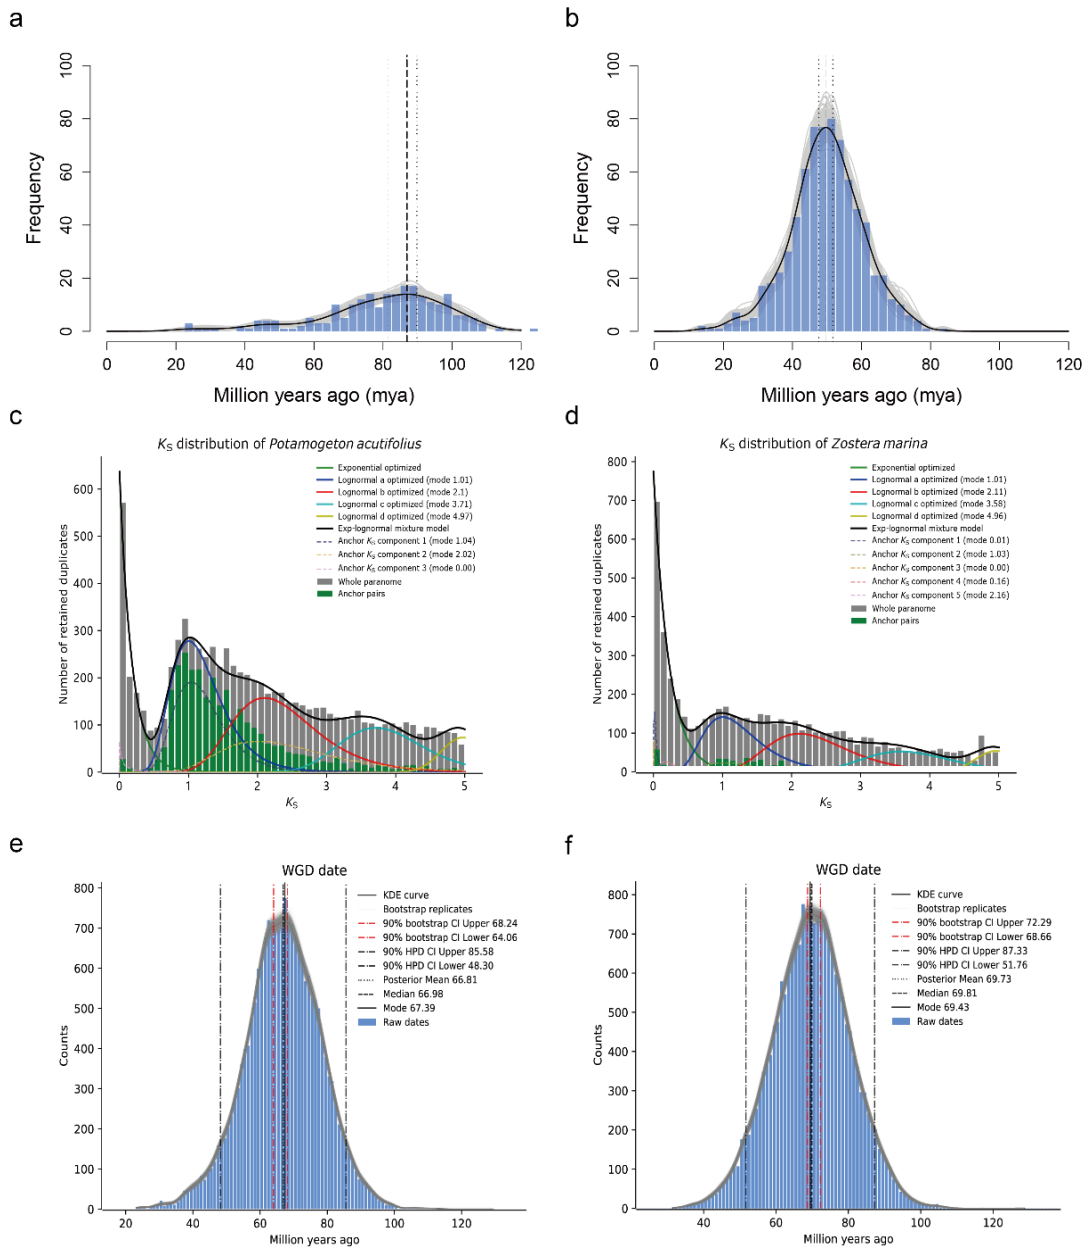

**Supplementary Figure 4.2.7** Estimation of the 'absolute age' of the WGT/WGD events in seagrasses and *P. acutifolius* by phylogenomic dating.

a) Estimation of the 'absolute age' of the *P. oceanica* WGT event by phylogenomic dating. The solid black line represents the KDE (Kernel Density Estimation) of the dated paralogues, while the vertical dashed black line represents its peak at 86.96 Mya, which was used as the consensus WGT age estimate. The grey lines represent density estimates from 2,500 bootstrap replicates (after we obtained the age estimates for each accepted orthogroup that satisfied the condition that the minimum ESS for every parameter is larger than 200, we calculated the bootstrap 90% confidence interval for the mode of fitted kernel density estimation (KDE) using the "boot" library in R upon these age estimates), while the vertical black dotted lines represent the corresponding 90% confidence interval for the WGD age estimate, 89.89 - 79.81 Mya. The histogram shows the raw distribution of dated paralogues. b) Estimation of the 'absolute age' of the recent *C. nodosa* WGD event. Interpretation is as in a). c) The mixture modeling results of whole paraneome and anchor  $K_s$  distribution of *P. acutifolius*. d) The mixture modeling results of whole paraneome and anchor  $K_s$  distribution of *Z. marina*. e) Estimation of the 'absolute age' of the recent *P. acutifolius* WGD event. Interpretation is as in a). f) Estimation of the 'absolute age' of the recent *Z. marina* WGD event. Interpretation is as in a).

**Supplementary Table 4.2** The absolute of WGD events taken from literature

| Species name                 | Date                          | Family           | Order        | Clade       | Phylogenetic position of WGD                 | Data Source                                                |
|------------------------------|-------------------------------|------------------|--------------|-------------|----------------------------------------------|------------------------------------------------------------|
| <i>Spirodela polyrhiza</i>   | 83-94, 95-100                 | Araceae          | Alismatales  | Monocots    | Araceae                                      | (Wang et al. 2014; An et al. 2019)                         |
| <i>Oryza sativa</i>          | 63.08-69.89, 100-120, 110-135 | Poaceae          | Poales       | Commelinids | Poaceae, Poales, non-Alismatales monocots    | (Tang et al. 2010; Vanneste et al. 2014; Ming et al. 2015) |
| <i>Elaeis guineensis</i>     | 48.25-55.97, 96.71-110.48     | Arecaceae        | Arecales     | Commelinids | Partial Arecaceae, Arecales                  | <b>Our dating, see Supplementary Figure 4.2.8</b>          |
| <i>Asparagus officinalis</i> | 59.24-72.43                   | Asparagaceae     | Asparagales  | Monocots    | Asparagus                                    | <b>Our dating, see Supplementary Figure 4.2.8</b>          |
| <i>Arabidopsis thaliana</i>  | 49.27-50.99                   | Brassicaceae     | Brassicales  | Rosids      | Partial Brassicaceae                         | (Guo et al. 2018)                                          |
| <i>Populus trichocarpa</i>   | 60-65, 125-140                | Salicaceae       | Malpighiales | Rosids      | Specific to Populus and Salix, Core eudicots | (Tuskan et al. 2006)                                       |
| <i>Rhizophora apiculata</i>  | 50.36-56.95                   | Rhizophoraceae   | Malpighiales | Rosids      | Rhizophoraceae                               | <b>Our dating, see Supplementary Figure 4.2.8</b>          |
| <i>Vitis vinifera</i>        | 125-140                       | Vitaceae         | Vitales      | Rosids      | Core eudicots                                | (International Peach Genome et al. 2013)                   |
| <i>Avicennia marina</i>      | 60.46-78.78                   | Acanthaceae      | Lamiales     | Asterids    | <i>Avicennia marina</i>                      | <b>Our dating, see Supplementary Figure 4.2.8</b>          |
| <i>Utricularia gibba</i>     | 43.37-53.99                   | Lentibulariaceae | Lamiales     | Asterids    | Utricularia                                  | <b>Our dating, see Supplementary Figure 4.2.8</b>          |
| <i>Solanum lycopersicum</i>  | 62.64-64.84                   | Solanaceae       | Solanales    | Asterids    | Solanaceae                                   | (Vanneste et al. 2014)                                     |

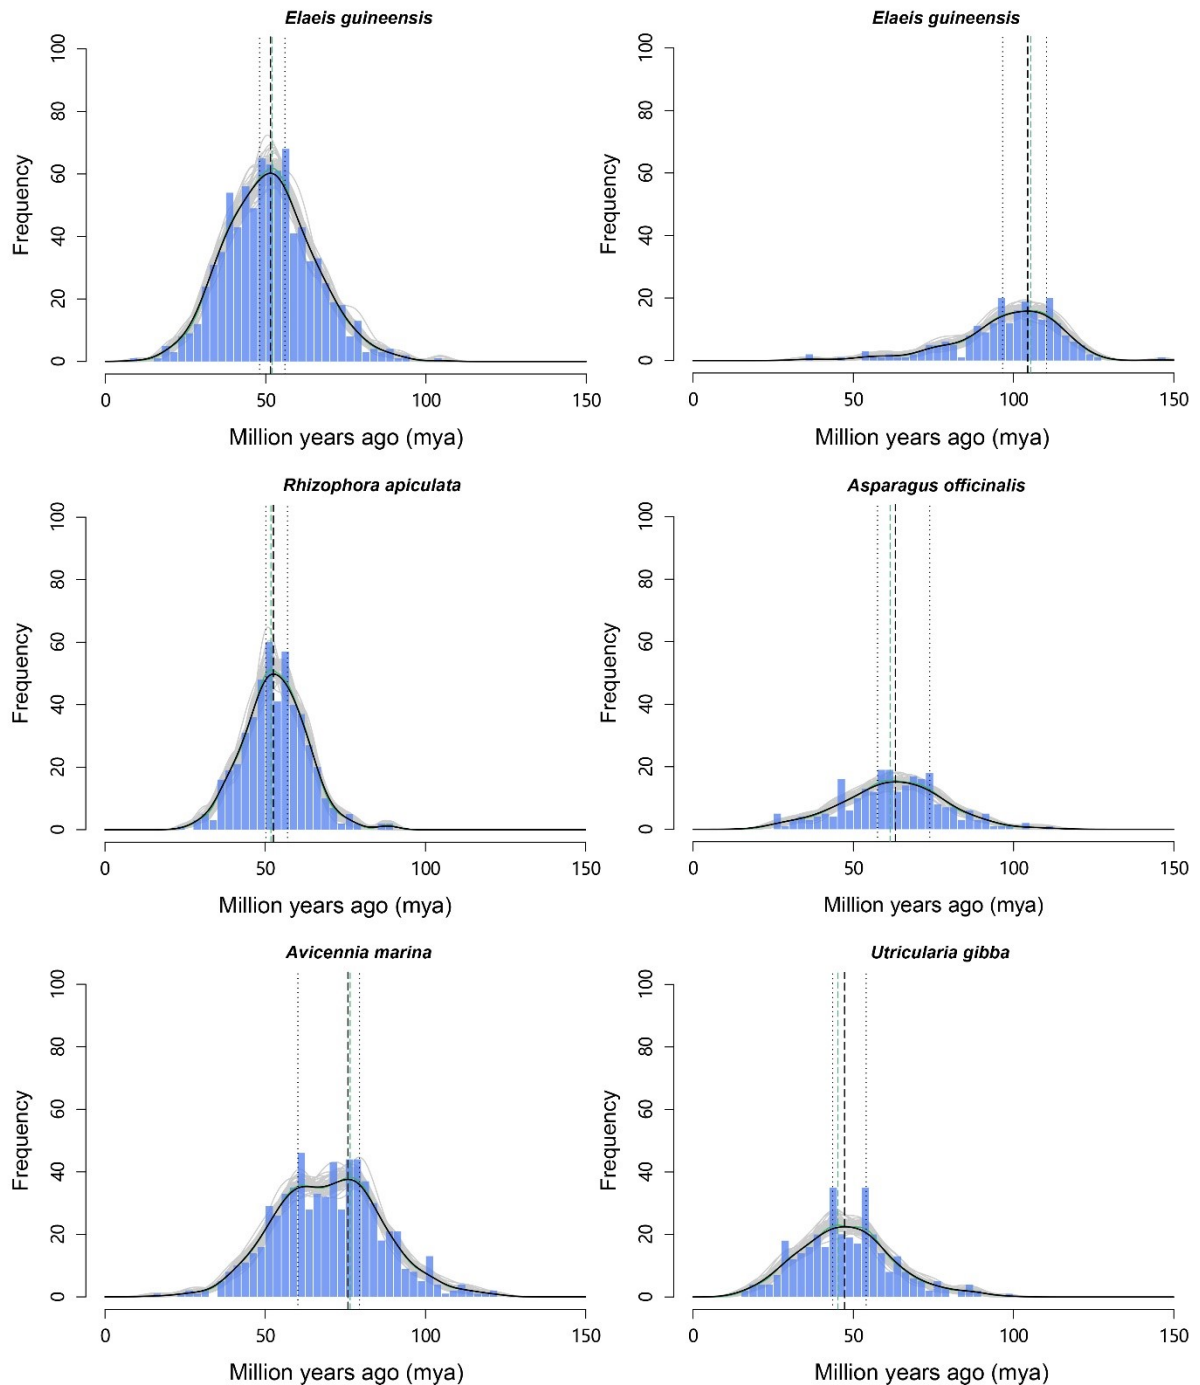

483

484 **Supplementary Figure 4.2.8** Estimation of the 'absolute age' of seven independent WGD events  
 485 experienced by *E. guineensis*, *A. officinalis*, *R. apiculata*, *A. marina* and *U. gibba* respectively by  
 486 phylogenomic dating of corresponding paralogues.

487 The solid black line represents the KDE (Kernel Density Estimation) of the dated paralogues, and the vertical  
 488 dashed black line represents the peak which was used as the consensus WGD age estimate. The grey lines  
 489 represent density estimates from 2,500 bootstrap replicates and the vertical black dotted lines represent the  
 490 corresponding 90% confidence interval for the WGD age estimate. The histogram shows the raw distribution of  
 491 dated paralogues.

492

### 493 4.3 Phylogenetic tree construction and estimation of divergence time

#### 494 **Supplementary Note 4.3** Species selection and construction of time-calibrated phylogeny.

495 Protein sets were collected for 23 species, including *Oryza sativa* (PLAZA 5.0), *Brachypodium distachyon* (PLAZA  
496 5.0), *Ananas comosus* (PLAZA 5.0), *Elaeis guineensis* (PLAZA 5.0), *Asparagus officinalis* (PLAZA 5.0), *Beta vulgaris*  
497 (PLAZA 5.0), *Utricularia gibba* (PLAZA 5.0), *Solanum lycopersicum* (PLAZA 5.0), *Coffea canephora* (PLAZA 5.0),  
498 *Vitis vinifera* (PLAZA 5.0), *Populus trichocarpa* (PLAZA 5.0), *Arabidopsis thaliana* (PLAZA 5.0), *Theobroma cacao*  
499 (PLAZA 5.0), *Avicennia marina* (PLAZA 5.0), *Spirodela polyrhiza* (PLAZA 5.0), *Amborella trichopoda* (PLAZA 5.0),  
500 *Wolffia australiana* (<https://duckweeds.plantprofile.net/>), *Rhizophora apiculata* (from the author), our four  
501 seagrasses and *Potamogeton acutifolius* (from ORCAE, <https://bioinformatics.psb.ugent.be/orcae/>). These  
502 species were selected as representatives for monocots and eudicots, and representing different habitats from  
503 terrestrial, freshwater-floating, freshwater-submerged, to marine-submerged. Orthofinder v2.3 (Emms and  
504 Kelly 2015) was used to delineate gene families with mcl inflation factor 3.0. All-versus-all Diamond blast with  
505 an E-value cutoff of 1e-05 was performed and orthologous genes were clustered using OrthoFinder. Single-copy  
506 orthologous genes were extracted from the clustering results. MAFFT (Rozewicki et al. 2019) with default  
507 parameters was used to perform multiple sequence alignment of protein sequences for each set of single-copy  
508 orthologous genes, and to transform the protein sequence alignments into codon alignments after removing  
509 the poorly aligned or divergent regions using trimAl (Capella-Gutiérrez et al. 2009). The resulting codon  
510 alignments from all single-copy orthologs were then concatenated into one supergene for species phylogenetic  
511 analysis. A maximum-likelihood phylogenetic tree of single-copy protein alignments and codon alignments was  
512 constructed using IQ-TREE (Minh et al. 2020) with the GTR+G model and 1,000 bootstrap replicates. Divergence  
513 times between the 23 plant species were estimated using MCMCtree from the PAML package under the GTR+G  
514 with reference divergence times of 124-170 MYA for the common ancestor of monocots and eudicots, 118-129  
515 MYA for the divergence between *Spirodela* and *Zostera* and 130-140 MYA between *Spirodela* and other  
516 terrestrial monocots (An et al. 2019). We used MCMCTree to obtain 10,000 trees from the posterior sampling  
517 every 150 iterations after a burn-in of 500,000 iterations. We compared two independent runs with each other  
518 to verify convergence and with a run of the MCMC algorithm under the prior alone to compare the posterior  
519 distribution for the node ages to the effective prior implied by the fossil calibrations.

520

521 5. Adaptation to the marine environment  
 522 5.1. Use it or lose it

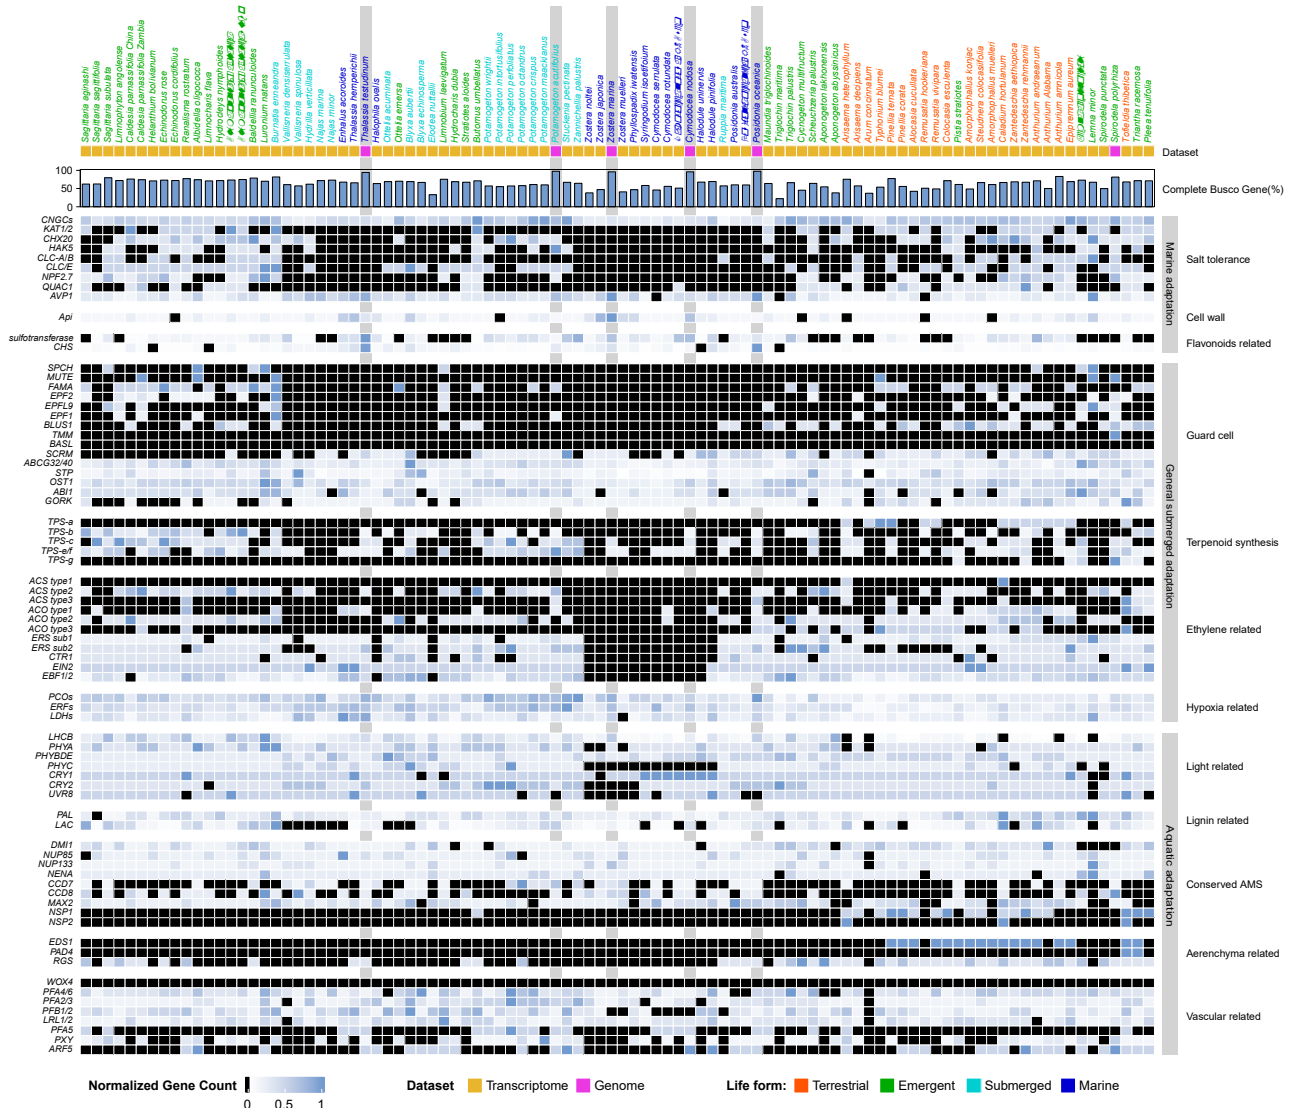

523 **Supplementary Figure 5.1** Normalized gene counts for each species. Species with light grey  
 524 backgrounds denote seagrass species and one freshwater relative, *Potamogeton acutifolius*, discussed in the  
 525 present study. Other species are discussed in (Chen et al. 2022). Taxon order is phylogenetic. Normalization  
 526 for each gene family was obtained by dividing the number of genes in that gene family for a particular species  
 527 by the largest gene copy number within that family (considering all species). Genes in black are absent.

528



## 529 5.2 Pathogen resistance (R-) genes

### 530 **Supplementary Note 5.2 Pathogen resistance gene**

531 Effector-triggered immunity is one of the two main arms of the plant immune system and allows angiosperms  
532 to specifically detect pathogen effectors or their impact on host proteins. The detection is guided by nucleotide-  
533 binding leucine rich repeat receptors (*NLRs*), which is one of the largest gene families in plants, and under  
534 diversifying selection (Jacob et al. 2013). Of the two main domains of *NLR* resistance genes, the nucleotide  
535 binding site (NBS) domain is responsible for downstream signaling, and the leucine rich repeat (LRR) domain  
536 binds the target. *NLR* genes are often difficult to identify in genomes. Therefore, we used two software packages,  
537 *NLR-Annotator* (Steuernagel et al. 2020) and *NLGenomeSweeper* (Toda et al. 2020), followed by manual curation  
538 in a genome browser.

539 The number of *NLR* genes is strongly reduced (N=44) in *Z. marina* (Olsen et al. 2016) and similar reductions have  
540 since been found in many freshwater species (N= 100 range) (Liu et al. 2021), which is far less than in terrestrial  
541 species (N=100-300-500 [2300 in wheat]). Thus, we expected to see a similar extreme reduction in our new  
542 seagrass species, but this was not the case. While reduced in comparison to terrestrial species the number of  
543 *NLR* genes was markedly higher than in *Z. marina*; *C. nodosa* (N=87), *P. oceanica* (N=95) and *T. testudinum* (N=54).

544 Confirming our general hypothesis of convergent evolution at the genomic level, these seagrass species have  
545 low counts of *NLR* gene copies (Supplementary Table 5.2). Further, *NLRs* with a TIR domain are completely  
546 absent, which is typical of many monocots, and a few genes are missing the LRR domain. We also found that 30-  
547 40% of gene copies are non-functional in *C. nodosa*, *P. oceanica*, *T. testudinum* and *P. acutifolius*, either because  
548 of stop mutations or partial copies. By contrast, only 8% are non-functional in *Z. marina* (Supplementary Table  
549 5.2).

550 The *NLR* gene copies occur in clusters towards the terminal ends of the chromosomes consistent with findings  
551 in other plants (Jacob et al. 2013). These clusters are made up of tandem copies as evidenced by their  
552 relationship shown in the NBS-domain-based phylogenetic tree and chromosomal location (Supplementary  
553 Figure 5.2.1 and Supplementary Figure 5.2.2). Here, they cluster into several clades, each including all of the  
554 species, thus indicating that the ancestor also contained these gene lineages. Similarly, when incorporating other  
555 more distantly related species in the NBS tree (not shown), the seagrass-genes-branches are distributed  
556 throughout, so old *NLR* gene lineages are still maintained, despite the reduction in total number compared to  
557 other plants. Single lineages are expanded into clusters of dozens of copies at the species level, especially in *C.*  
558 *nodosa* and *P. acutifolius* (Supplementary Figure 5.2.1). From an evolutionary perspective, clustering is  
559 considered as a reservoir of genetic variation (Jacob et al. 2013).

560

561 **Supplementary Table 5.2** *NLR* gene counts by domain architecture and completeness in seagrasses  
 562 and *P. acutifolius*.

563 Completeness was determined by the NLR-Annotator software. Complete/partial refers to the set of motifs  
 564 needed for a functional gene; pseudogene refers to loci that do not have complete open reading frames. Gene  
 565 class abbreviations in parentheses are a more general designation used in some papers.

566 Note: Due to their partly fragmented nature not all *NLR* genes are present in the genome annotation with gene  
 567 IDs. The genomic coordinates of all identified *NLR* genes can however be found in Extended Data Table 5.

| <b><i>NLR</i> gene class</b> | <b><i>Cymodocea nodosa</i></b> | <b><i>Posidonia oceanica</i></b> | <b><i>Thalassia testudinum</i></b> | <b><i>Zostera marina v3.1</i></b> | <b><i>Potamogeton acutifolius</i></b> |
|------------------------------|--------------------------------|----------------------------------|------------------------------------|-----------------------------------|---------------------------------------|
| CC-NBS (CN)                  | 2                              | 0                                | 0                                  | 0                                 | 2                                     |
| CC-NBS-LRR (CNL)             | 59                             | 58                               | 27                                 | 21                                | 71                                    |
| NBS-LRR (NL)                 | 26                             | 37                               | 27                                 | 23                                | 40                                    |
| NBS (N)                      | 0                              | 0                                | 0                                  | 0                                 | 2                                     |
| TIR-NBS (TN)                 | 0                              | 0                                | 0                                  | 0                                 | 0                                     |
| TIR-NBS-LRR (TNL)            | 0                              | 0                                | 0                                  | 0                                 | 0                                     |
| <b>Total</b>                 | <b>87</b>                      | <b>95</b>                        | <b>54</b>                          | <b>44</b>                         | <b>115</b>                            |
| <b>NLR gene completeness</b> |                                |                                  |                                    |                                   |                                       |
| Complete                     | 69                             | 62                               | 42                                 | 26                                | 87                                    |
| Complete pseudogene          | 20                             | 28                               | 15                                 | 18                                | 27                                    |
| Partial                      | 13                             | 14                               | 12                                 | 0                                 | 25                                    |
| Partial pseudogene           | 44                             | 41                               | 13                                 | 4                                 | 17                                    |
| <b>% Complete</b>            | <b>61</b>                      | <b>62</b>                        | <b>70</b>                          | <b>92</b>                         | <b>73</b>                             |

568

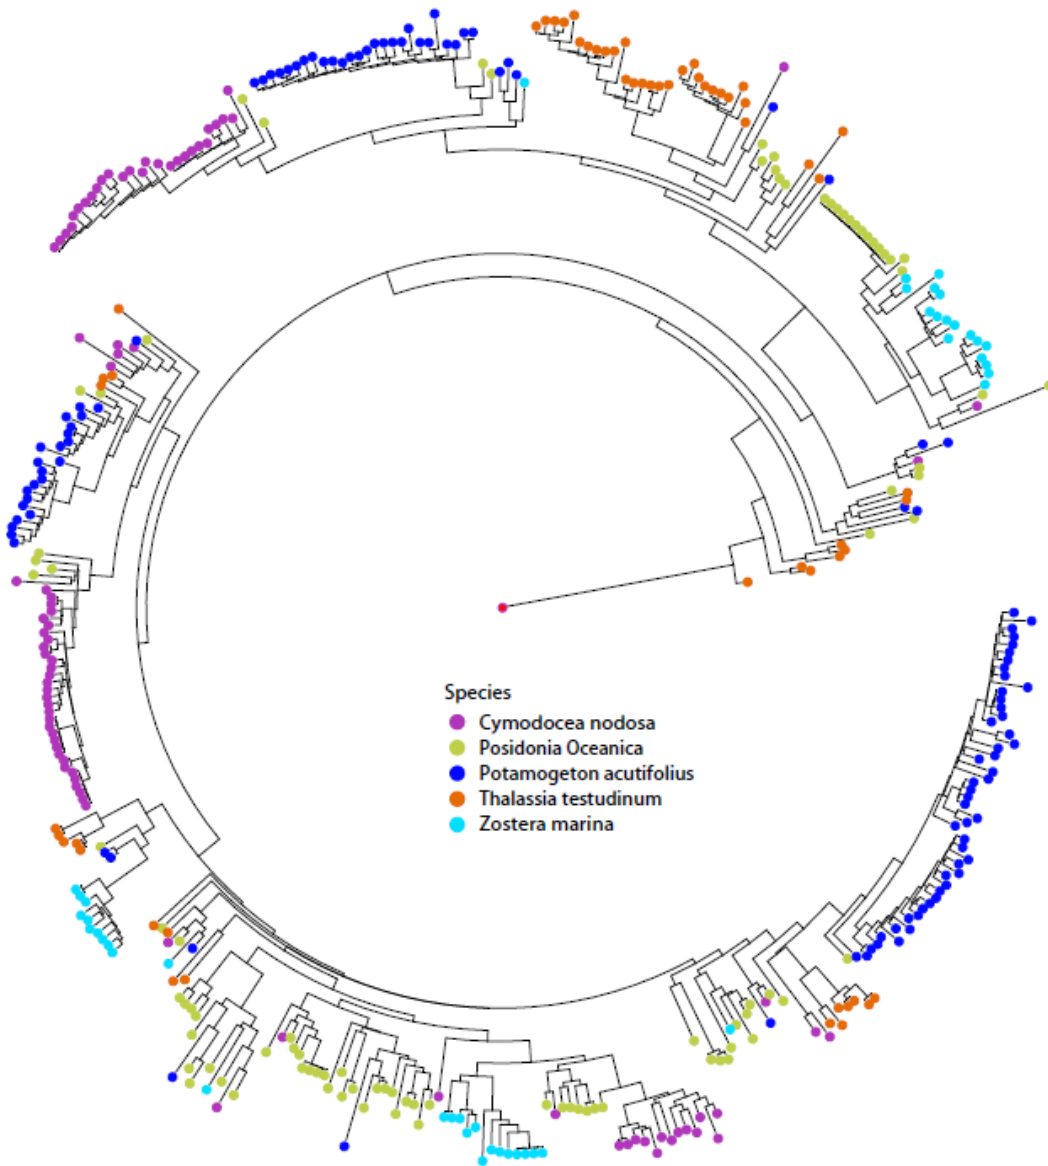

570

571 **Supplementary Figure 5.2.1** Phylogenetic tree of seagrass *NLR* genes based on NBS domain.

572

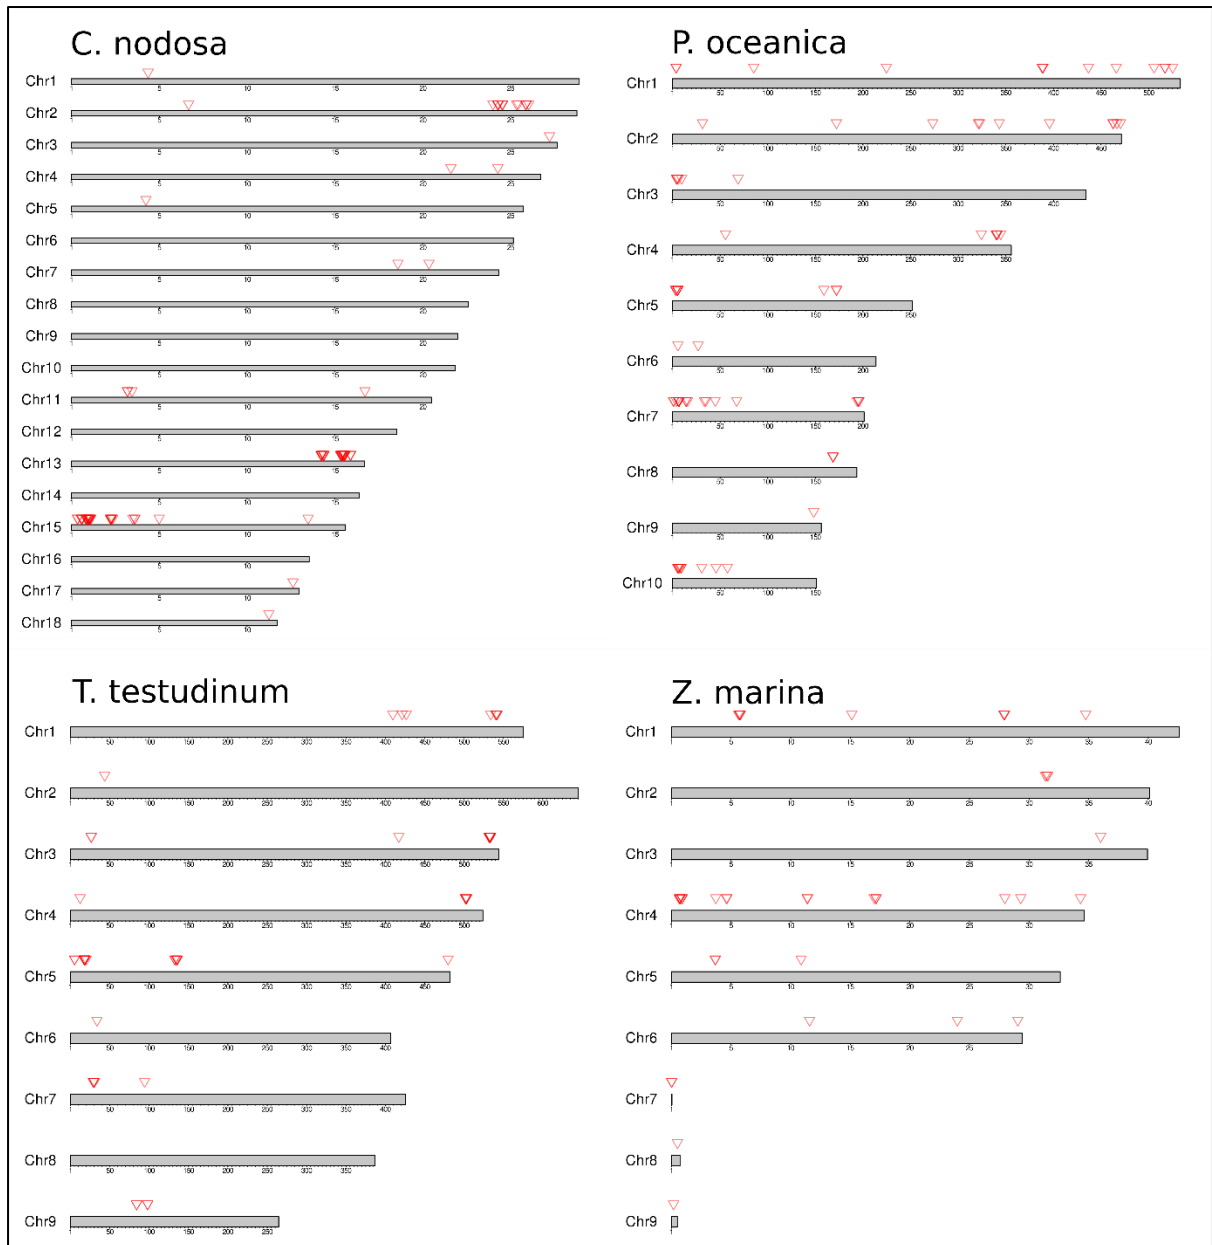

573

574 **Supplementary Figure 5.2.2** Distribution of seagrass *NLR* genes across chromosomes.

575 *NLR* genes are indicated by red arrows and predominantly occur in the distal regions.

576

### 577 5.3 Heat Shock factor (*HSF*) gene family evolution

#### 578 **Supplementary Note 5.3** *HSF* gene family

579 Heat shock transcription factors (*HSFs*) are a family of DNA-binding proteins that activate a cascading network  
 580 of genes that act together to enhance plant tolerance to abiotic stress conditions, including heat, cold, drought,  
 581 hypoxia, salinity, toxicity and excessive irradiance (Scharf et al. 2012). Based on the topology of their domains,  
 582 *HSFs* are classified into three major classes (*HSFA*, *HSFB* and *HSFC*), which are further subdivided into 16  
 583 subfamilies: *HSFA1-HSFA9*, *HSFB1-HSFB5* and *HSFC1-HSFC2*. Individual *HSFs* have unique functions as part of  
 584 different signal transduction pathways operating in response to environmental stress and during plant  
 585 development (von Koskull-Döring et al. 2007). To examine the different composition of *HSF* gene families in  
 586 seagrasses, *HSF* families of *Cymodocea nodosa*, *Posidonia oceanica*, *Thalassia testudinum* and *Zostera marina*,

587 were compared with those of the freshwater plant *Potamogeton acutifolius*, ten terrestrial eudicots (*Amborella*  
588 *trichopoda*, *Arabidopsis thaliana*, *Beta vulgaris*, *Solanum lycopersicum*, *Populus trichocarpa*, *Vitis vinifera*, *Coffea*  
589 *canephora*, *Theobroma cacao* and the mangroves *Avicennia marina* and *Rhizophora apiculata*), five terrestrial  
590 monocots (*Oryza sativa*, *Brachypodium distachyon*, *Elaeis guineensis*, *Ananas comosus* and *Asparagus officinalis*)  
591 and three other freshwater plant species (one eudicot: *Utricularia gibba*; two monocots: *Spirodela polyrhiza* and  
592 *Wolffia australiana*). *HSF* sequences were searched in the Plant Transcriptional Factor Data Base (PlantTFDB,  
593 <http://plantfdb.gao-lab.org/>) and in Phytozome 13 (<https://phytozome-next.jgi.doe.gov/>). Protein sequences  
594 were subsequently downloaded from PLAZA (<https://bioinformatics.psb.ugent.be/plaza/>), the PlantTFDB or,  
595 when needed, from the species genome web page (*Wolffia australiana*: <https://duckweeds.plantprofile.net/>;  
596 *Utricularia gibba*: <http://genomevolution.org/CoGe/>). Sequences were then uploaded to the HEATSTER  
597 platform to check their identity as *HSFs* and to use a single criterion for their classification within the 16 *HSF* sub-  
598 classes. Classification and annotation were performed in HEATSTER via two successive steps of repeated  
599 searches in a motif database (motifs: DBD and OD with HR-A and HR-B region). In those cases where a specified  
600 sequence did not contain all *HSF*-associated motifs, classification was based on the recognition of the most  
601 conserved domain (DBD) with an E-value < 1e-20.

602 In our analysis, the average number of *HSFs* in land plants (Supplementary Table 5.3) was similar to the values  
603 recently reported in a comprehensive study involving 29 eudicots and 10 monocots (Wang et al. 2018). We found  
604 that aquatic plants have a lower number of *HSFs* than terrestrial plants (54% on average), with no clear  
605 differences between marine and freshwater species. The four studied seagrass species have on average 11.8 ( $\pm$   
606 1.0) sequences recognized as *HSFs*, with all three types of *HSFs* (A, B and C) showing a strong contraction. The  
607 average number of class A and B members is reduced by 67.4% and 43% respectively in seagrasses compared to  
608 terrestrial monocots (Supplementary Table 5.3). In addition, some subclasses are completely absent in  
609 seagrasses (Extended Data Table 5). In the *HSFA* class, subclass A3, A7, A8 and A9 are lacking in seagrasses but  
610 are common in terrestrial monocots (except A9 found only in eudicots). Along with their role in the response to  
611 heat stress, these subfamilies have specialized functions in the response of plants and seeds to different abiotic  
612 stresses, mainly dehydration, drought stress and oxidative stress (Sakuma et al. 2006; von Koskull-Döring et al.  
613 2007; Scharf et al. 2012; Personat et al. 2014). The emergence of new functionalities has been associated with  
614 the weak purifying selection of these subfamilies in terrestrial plants (Wang et al. 2018). Contrarily, subfamilies  
615 A1, A2, A5 and A6, which are subjected to more severe selection pressure and directly involved in the heat stress  
616 response (Heerklotz et al. 2001; Mishra et al. 2002; Scharf et al. 2012; Xue et al. 2014), are represented in  
617 seagrasses. These results reveal that marine plants have lost several subclasses of *HSFA* previously acquired to  
618 cope with the stress conditions associated with a terrestrial lifestyle.

619 Regarding the *HSFB* class, subclasses B3 and B5 are not present in seagrasses, but neither are they present in  
620 terrestrial monocots as they presumably arose after the split of monocots and eudicots (Scharf et al. 2012; Guo  
621 et al. 2016). Seagrasses retained B1 and B2 subclasses (Extended Data Table 5), both of which are involved in  
622 promoting the activity of *HSFA1*, which is the master regulator of the heat stress response in *Arabidopsis* (Ikeda  
623 et al. 2011; Scharf et al. 2012). Moreover, *HSFB1* form a triad with *HSFA1* and *HSFA2* in tomato, acting as  
624 synergistic coactivator of heat stress responsive genes during the exposure and recovery to high temperatures  
625 (Mishra et al. 2002; Scharf et al. 2012). It is therefore evident that marine plants have conserved all major *HSF*  
626 subclasses that functionally cooperate in the heat stress response and thermotolerance of plants (A1, A2, A5,  
627 A6, B1 and B2).

628 *HSFC* family members (i.e., C1 and C2) are completely absent in seagrasses. Although the function of class C *HSFs*  
629 is the least known, they appear to be integrated into signaling pathways not directly related to the heat stress  
630 response (Scharf et al. 2012). *HSFC2* act as transcriptional activator of heat shock protein (*HSP*) genes in wheat  
631 during heat, drought and salt stress (Xue et al. 2014), and is up-regulated in rice by oxidative and heat stress  
632 (Mittal et al. 2012). Similarly, *HSFC1* showed altered expression levels in *Arabidopsis* under several stress  
633 conditions, including cold stress, freeze stress and dehydration stress (Lee et al. 2005; Xin et al. 2007; Ding et al.

634 2013; Zhuang et al. 2018). These results indicate that the functionally specialized *HSFC* family, which emerged  
 635 during the evolution of plants towards a terrestrial lifestyle, has been lost when plants returned to the sea.

636 In summary, plants with an aquatic lifestyle, including those adapted to the marine environment (seagrasses),  
 637 have a reduced number of *HSFs* compared to terrestrial plants. Despite having a small number of members,  
 638 seagrasses have retained those *HSF* subfamilies under strong purifying selection in land plants, probably to  
 639 maintain important biological functions. Among them is the main group of *HSFs* directly related to heat stress  
 640 response and thermotolerance in plants. In contrast, subfamilies of *HSFs* with specialized functionalities for plant  
 641 adaptation to terrestrial habitats and not directly related to heat stress response but to other types of abiotic  
 642 stresses (e.g., drought) have been lost in seagrasses. The greater homogeneity and stability of environmental  
 643 conditions at sea relative to those on land is the most likely cause of these changes. Finally, only tropical  
 644 seagrasses retained some of the key heat stress-related *HSFs* from WGD and WGT events (*C. nodosa*: *HSFA1* and  
 645 *HSFB4*; *T. testudinum*: *HSFB2*), which could be related to their warmer native environment and higher heat stress  
 646 tolerance compared to temperate seagrasses (*P. oceanica* and *Z. marina*).

647 **Supplementary Table 5.3 Average ( $\pm$  SD) number of total *HSFs* and number of *HSFs* from the three**  
 648 **main classes (*HSFA*, *HSFB* and *HSFC*) in the analyzed plant genomes.**

649 The basal angiosperm *Amborella trichopoda* (11 sequences) and the freshwater eudicot plant *Utricularia gibba*  
 650 (21 sequences) were not included in the table.

| Plant group        | No. species | Total <i>HSFs</i> | <i>HSFA</i>    | <i>HSFB</i>   | <i>HSFC</i>   |
|--------------------|-------------|-------------------|----------------|---------------|---------------|
| TERRESTRIAL        | 14          | 28.0 $\pm$ 10.0   | 16.5 $\pm$ 6.6 | 8.3 $\pm$ 3.7 | 2.1 $\pm$ 1.8 |
| Eudicots           | 9           | 26.1 $\pm$ 10.3   | 15.1 $\pm$ 6.5 | 8.3 $\pm$ 4.3 | 1.2 $\pm$ 0.9 |
| Monocots           | 5           | 31.4 $\pm$ 9.7    | 19.2 $\pm$ 6.5 | 8.4 $\pm$ 2.5 | 3.8 $\pm$ 1.8 |
| AQUATIC (monocots) | 7           | 12.9 $\pm$ 3.3    | 7.4 $\pm$ 2.6  | 5.4 $\pm$ 1.3 | 0.0 $\pm$ 0.0 |
| Freshwater         | 3           | 14.3 $\pm$ 5.1    | 9.0 $\pm$ 3.6  | 5.3 $\pm$ 1.5 | 0.0 $\pm$ 0.0 |
| Seagrasses         | 4           | 11.8 $\pm$ 1.0    | 6.3 $\pm$ 0.5  | 5.5 $\pm$ 1.3 | 0.0 $\pm$ 0.0 |



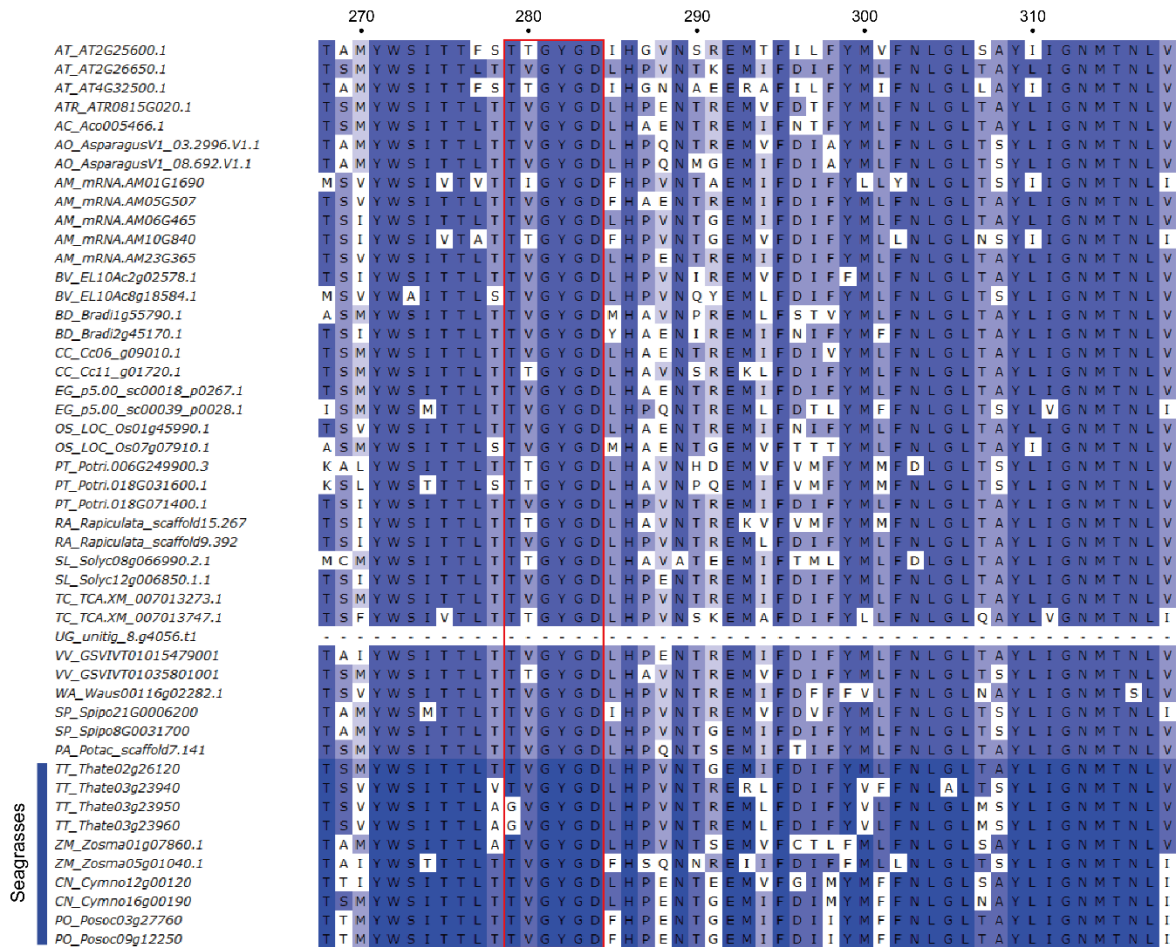

656

657 **Supplementary Figure 5.4.2** Sequence alignment of *AKT5/6/1* showing the loss of Shaker-type  $K^+$   
 658 channels with a TTYGVD-selectivity filter in all seagrasses.

659 A TTYGVD-selectivity filter is indicated by the red box; Full list of abbreviation of the species names used in the  
 660 figure: AT *Arabidopsis thaliana*; SL *Solanum lycopersicum*; ATR *Amborella trichopoda*; AC *Ananas comosus*; AO  
 661 *Asparagus officinalis*; AM *Avicennia marina*; BV *Beta vulgaris*; BD *Brachypodium distachyon*; CC *Coffea*  
 662 *canephora*; CN *Cymodocea nodosa*; EG *Elaeis guineensis*; OS *Oryza sativa*; PO *Posidonia oceanica*; PT *Populus*  
 663 *trichocarpa*; PA *Potamogeton acutifolius*; RA *Rhizophora apiculata*; SP *Spirodela polyrhiza*; TT *Thalassia*  
 664 *testudinum*; TC *Theobroma cacao*; VV *Vitis vinifera*; UG *Utricularia gibba*; WA *Wolffia australiana*; ZM *Zostera*  
 665 *marina*.

666

667



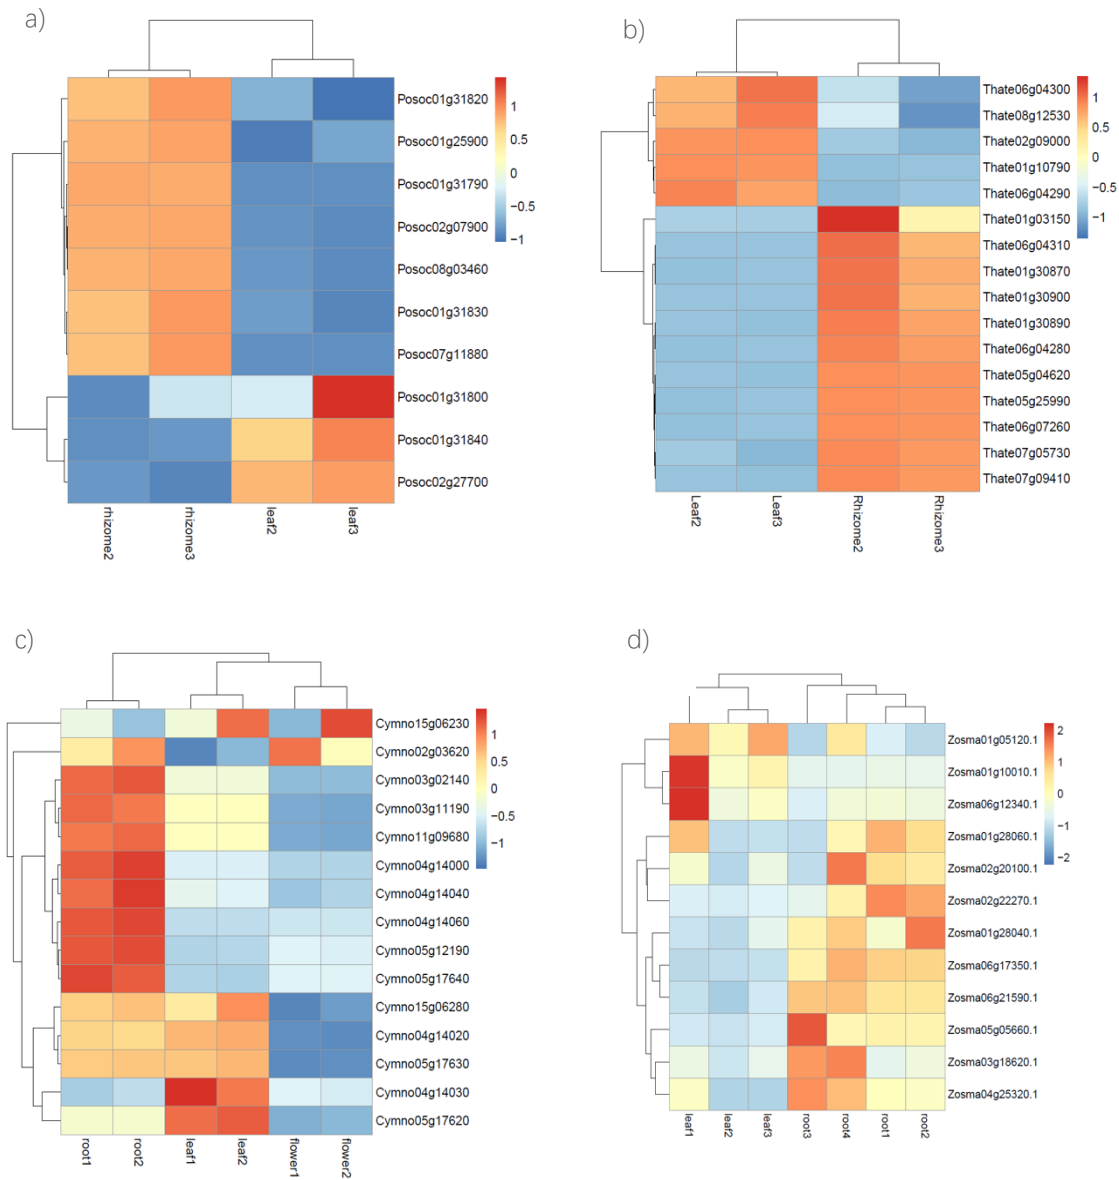

671 **Supplementary Figure 5.5.1** Differential expression of *ERF-VII*s in the four seagrass species.

672 a. Leaf vs. rhizome in *P. oceanica*, b. Leaf vs. rhizome in *T. testudinum*, c. leaf vs. rhizome vs. flower in *C. nodosa*;

673 d. leaf vs. root in *Z. marina*. Most *ERF-VII*s had higher expression in rhizomes and roots as compared to leaves in

674 four seagrasses.

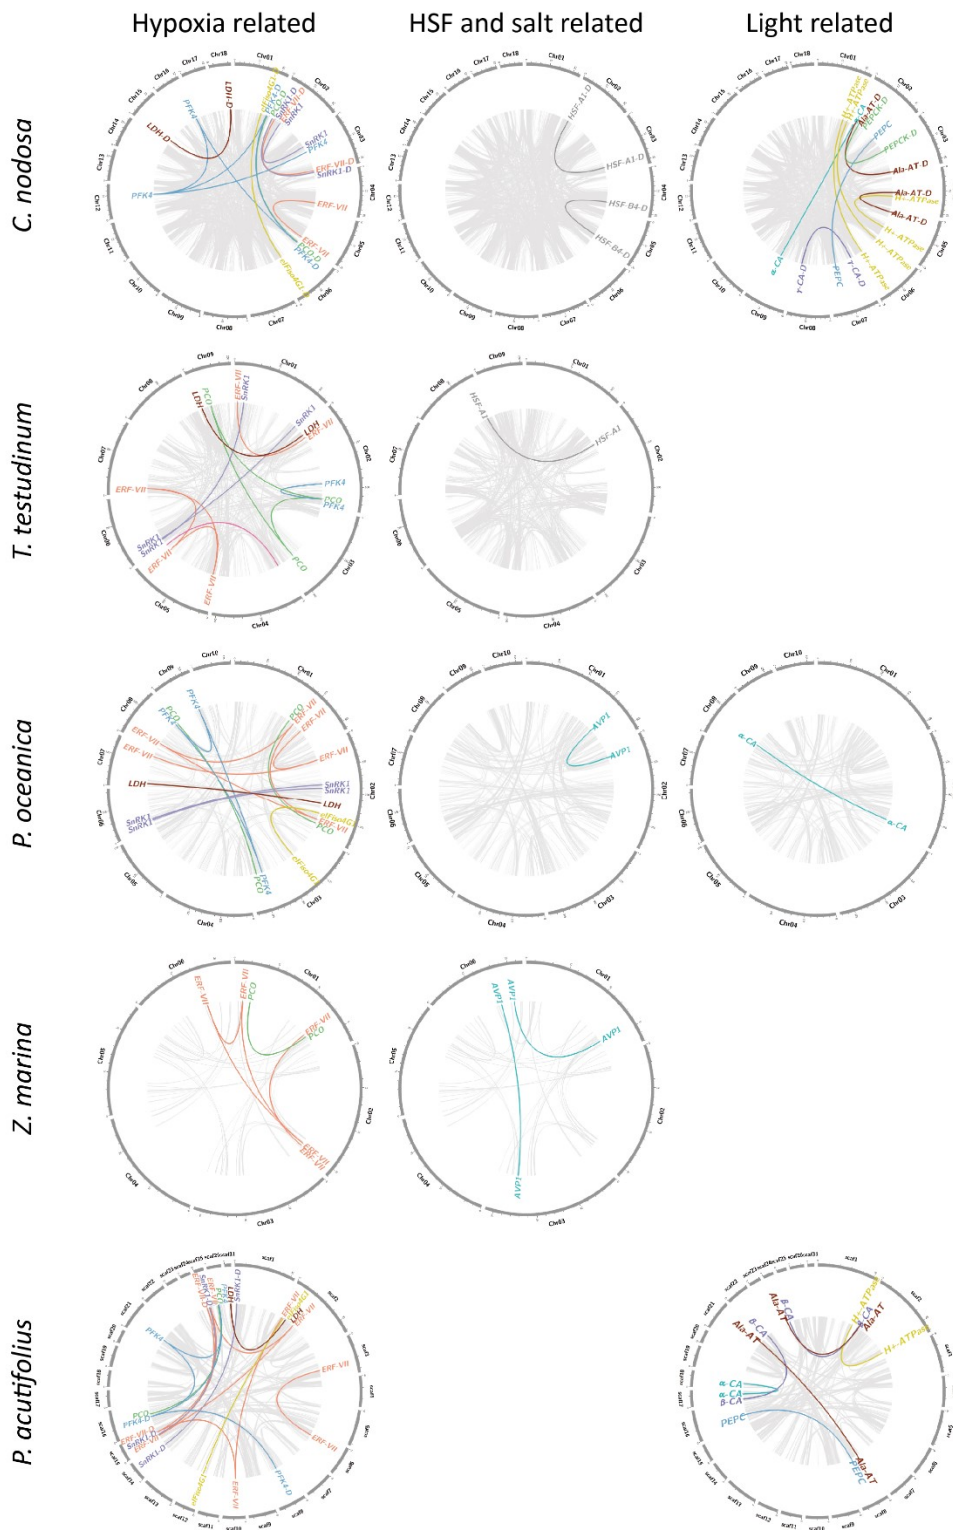

**Supplementary Figure 5.2** Syntenic relationship of genes mentioned in the main text for *P. oceanica*, *T. testudinum*, *Z. marina*, *C. nodosa*, and *P. acutifolius*.

Different colors represent different families derived from the whole-genome triplication event, as well as from the whole-genome duplication events for *P. oceanica*, *T. testudinum*, *Z. marina*, *C. nodosa*, and *P. acutifolius*. Gene names without the -D suffix means they are derived from the WGT event; Gene names with -D suffix in *C. nodosa*, and *P. acutifolius* means they are derived from the WGD event.

## 676 5.6 Light perception, circadian clock, and photosynthetic carbon acquisition

### 677 **Supplementary Note 5.6.1** CO<sub>2</sub>-concentrating mechanisms (CCMs) and photosynthetic carbon 678 acquisition

679 One of the major challenges that face seagrasses is the acquisition of inorganic carbon (Ci) for photosynthesis.  
680 Photosynthetic carbon limitation in the marine environment results from several physicochemical factors that  
681 restrict the supply of Ci to the leaf surface of seagrasses. Of the DIC (dissolved inorganic carbon) pool in seawater,  
682 the bicarbonate ion (HCO<sub>3</sub><sup>-</sup>) accounts for nearly 90%, while the primary Ci source for RuBisCO (CO<sub>2(aq)</sub>) is in  
683 limited supply (roughly 1% of the DIC pool) (Campbell and Fourqurean 2013). Many algae and terrestrial plants  
684 have thus evolved various carbon-concentrating mechanisms (CCMs) to enhance their photosynthetic  
685 capabilities under Ci limitation. The occurrence of true CCMs in seagrasses is currently still a matter of debate  
686 (Larkum et al. 2017; Larkum et al. 2018), although recent findings point to the existence of biophysical CCMs  
687 and demonstrate an evolutionary adaptation of RuBisCO kinetics across submerged angiosperms (Capó-Bauçà  
688 et al. 2022). This closely resembles what seen in eukaryotic algae rather than that of terrestrial C4 plants  
689 (biochemical CCMs). The acquisition of HCO<sub>3</sub><sup>-</sup> for photosynthesis can occur via two (non-exclusive) basic models:  
690 (a) apoplastic conversion of HCO<sub>3</sub><sup>-</sup> to CO<sub>2</sub> and OH<sup>-</sup>, catalyzed by external carbonic anhydrases (CA); (b) direct  
691 uptake of HCO<sub>3</sub><sup>-</sup> by anion transporters or an H<sup>+</sup>-HCO<sub>3</sub><sup>-</sup> symport based on H<sup>+</sup>-ATPase pumps (Larkum et al. 2018).  
692 In *P. oceanica*, a direct HCO<sub>3</sub><sup>-</sup> uptake via a fusicoccin-sensitive H<sup>+</sup>-ATPase pump has recently been demonstrated  
693 (Rubio et al. 2017).

694 The four seagrass species studied, as well as *Potamogeton*, possess genes encoding for all three carbonic  
695 anhydrase gene families present in higher plants (i.e.,  $\alpha$ ,  $\beta$  and  $\lambda$ ) (DiMario et al. 2017). Six orthogroups (OGs)  
696 encode for  $\alpha$ -CA, the most abundant family, two are associated to  $\beta$ -CA and two to  $\lambda$ -CA, respectively (Extended  
697 Data Table 9). Overall, 87% of seagrass  $\alpha$ -CA are identified as extracellular/soluble proteins (Supplementary  
698 Table 5.6), which could be excreted from epidermal cells for catalyzing the conversion of HCO<sub>3</sub><sup>-</sup> to CO<sub>2</sub> and OH<sup>-</sup>,  
699 likely contributing to CCMs (Larkum et al. 2017). 64% of seagrass  $\beta$ -CA are targeted to the chloroplast, generally  
700 to the chloroplast stroma or thylakoid membranes, while 100% of  $\lambda$ -CA are targeted to the mitochondria (data  
701 not shown). This seems to confirm that seagrasses do have a requirement for an extracellular CA activity for  
702 adequate photosynthesis, as previously demonstrated by using chemical inhibitors (Larkum et al. 2017; Larkum  
703 et al. 2018; Capó-Bauçà et al. 2022).  $\alpha$ -CA OG0013954 is exclusive of seagrasses (except for *T. testudinum*) and  
704 *P. acutifolius* (Extended Data Table 9). All sequences within this OG possess the typical  $\alpha$ -CA domain, but most  
705 of them have variable mutations of the canonical His at the active site (data not shown), with unknown effects.  
706 Almost all OG0013954 members, as well as other  $\alpha$ -CA transcripts, are highly expressed in leaf tissue  
707 (Supplementary Figure 5.6.1), which could support the hypothesis that they constantly increase the CO<sub>2</sub>  
708 concentration in the periplasmic space, thus enhancing its diffusive transfer to RuBisCO and the photosynthetic  
709 rate in seagrass leaves.  $\alpha$ -CA OG0028785 appears unique to *Z. marina*. A slight expansion of  $\alpha$ -CA genes is  
710 evident in seagrasses with respect to terrestrial and freshwater/brackish-water species, when considering the  
711 average number of genes per species (terrestrial: 7; freshwater/brackish: 6; marine: 8). This increase in copy  
712 number of  $\alpha$ -CA in *P. oceanica* and *P. acutifolius* results from the WGT event as well as specific tandem  
713 duplications.

714 A C4 or C3-C4 intermediate photosynthetic metabolism could also contribute to CCMs in seagrasses. We  
715 screened the components of the C4 photosynthesis pathway as outlined in Rao et al. (2016). The analysis of C4-  
716 pathway related genes revealed that all genes typical of terrestrial plants are present in seagrasses (Extended  
717 Data Table 9). However, this is not diagnostic of a functional C4 biochemical pathway, as they have functions  
718 other than C4 photosynthesis. In addition, none of the studied species possesses the Ser residue characteristic  
719 of C4 Phosphoenolpyruvate carboxylase (PEPC) (data not shown). In *C. nodosa*, which has been previously  
720 hypothesized to be a C4 species (Koch et al. 2013), there were 15 C4-related genes retained specifically after  
721 WGT or WGD events, including two encoding for PEPC (retained after WGD). Similarly, in *P. acutifolius*, 17 C4-  
722 related genes were retained following WGT or WGD (Extended Data Table 9). We cannot exclude the presence

723 of some kind of C3-C4 intermediate metabolism at least in these species, similar to what observed in the  
 724 freshwater hydrophyte *Hydrilla verticillata* (Hydrochariraceae), where facultative single cell C4 type  
 725 photosynthesis is known to occur (Rao et al. 2002).

726 Four orthogroups are annotated as boron transporters (HCO<sub>3</sub><sup>-</sup> transporter family) in the studied species  
 727 (Extended Data Table 9). One orthogroup is completely absent in aquatic species (OG0012730). Regarding  
 728 proton pumps (H<sup>+</sup>-ATPases), only three OGs encoded for plasma membrane H<sup>+</sup>-ATPases (Extended Data Table  
 729 9), whose role could be associated to bicarbonate symport for photosynthesis. Overall, seagrasses have less  
 730 genes, on average per species, than terrestrial ones, but several of them were retained following WGT or WGD  
 731 events (7 in *C. nodosa*, 6 in *P. oceanica* and 3 in *P. acutifolius*) (Extended Data Table 9). This confirms that ATPase  
 732 pumps could still play a role in seagrasses for driving symport of different substances across the plasma  
 733 membrane, as demonstrated by Rubio et al. (2017) in *P. oceanica* for bicarbonate uptake.

734 **Supplementary Table 5.6 Prediction of sub-cellular localizations of  $\alpha$ -Carbonic Anhydrases ( $\alpha$ -CA) in**  
 735 **the studied seagrass species and *P. acutifolius*.**

736 The presence of transit and signal peptides for specific cellular compartments and the determination of the  
 737 protein type (soluble vs. membrane) was inferred by using multiple bioinformatics approaches. Genes in red are  
 738 retained after WGT or WGD (in red) events.

| Orthogroup | <i>C. nodosa</i>     |                                 | <i>P. oceanica</i>   |                                 | <i>T. testudinum</i> |                                 | <i>Z. marina</i> |                                 | <i>P. acutifolius</i>        |                                 |
|------------|----------------------|---------------------------------|----------------------|---------------------------------|----------------------|---------------------------------|------------------|---------------------------------|------------------------------|---------------------------------|
| OG0000299  | <b>Cymno02g02020</b> | Endoplasmic reticulum, Membrane | <b>Posoc02g30740</b> | Extracellular, Soluble          | Thate05g03940        | Sec/SPI; Extracellular, Soluble | Zosma01g08990    | Sec/SPI; Extracellular, Soluble | Potac_scaff old2.170         | Sec/SPI; Extracellular, Soluble |
|            | Cymno02g02030        | Sec/SPI; Extracellular, Soluble | Posoc02g30790        | Sec/SPI; Extracellular, Soluble | Thate05g03970        | Sec/SPI; Extracellular, Soluble | Zosma01g09000    | Sec/SPI; Extracellular, Soluble | Potac_scaff old2.171         | Sec/SPI; Extracellular, Soluble |
|            | Cymno02g02040        | Sec/SPI; Extracellular, Soluble | Posoc02g35020        | Sec/SPI; Extracellular, Soluble | Thate08g22080        | Sec/SPI; Extracellular, Soluble | Zosma06g13140    | Sec/SPI; Extracellular, Soluble | Potac_scaff old2.173         | Sec/SPI; Extracellular, Soluble |
|            | Cymno02g02050        | Extracellular, Soluble          | Posoc06g06700        | Endoplasmic reticulum, Membrane | Thate08g22090        | Sec/SPI; Extracellular, Soluble | Zosma06g16770    | Sec/SPI; Extracellular, Soluble |                              |                                 |
|            | Cymno02g02060        | Lysosome/ Vacuole, Soluble      |                      |                                 | Thate08g22100        | Sec/SPI; Extracellular, Soluble |                  |                                 |                              |                                 |
|            | Cymno09g06350        | Sec/SPI; Extracellular, Soluble |                      |                                 | Thate08g22270        | Sec/SPI; Extracellular, Soluble |                  |                                 |                              |                                 |
| OG0002316  | Cymno04g00210        | Extracellular, Soluble          | Posoc01g00410        | Sec/SPI; Extracellular, Soluble | Thate01g08320        | Cytoplasm, Soluble              |                  |                                 | Potac_scaff old2.352         | Cytoplasm, Soluble              |
|            |                      |                                 |                      |                                 | Thate01g08350        | Sec/SPI; Extracellular, Soluble |                  |                                 | Potac_scaff old9.158         | Sec/SPI; Extracellular, Soluble |
|            |                      |                                 |                      |                                 | Thate06g11790        | Sec/SPI; Extracellular, Soluble |                  |                                 |                              |                                 |
| OG0013954  | <b>Cymno09g03270</b> | Sec/SPI; Extracellular, Soluble | Posoc08g07760        | Sec/SPI; Extracellular, Soluble |                      |                                 | Zosma06g19600    | Sec/SPI; Extracellular, Soluble | Potac_scaff old17.661        | Sec/SPI; Extracellular, Soluble |
|            |                      |                                 | <b>Posoc08g07770</b> | Sec/SPI; Extracellular, Soluble |                      |                                 | Zosma06g20930    | Sec/SPI; Extracellular, Soluble | <b>Potac_scaff old17.663</b> | Sec/SPI; Extracellular, Soluble |
|            |                      |                                 |                      |                                 |                      |                                 |                  |                                 | <b>Potac_scaff old18.302</b> | Sec/SPI; Extracellular, Soluble |
| OG0028785  |                      |                                 |                      |                                 |                      |                                 | Zosma01g03190    | Sec/SPI; Extracellular, Soluble |                              |                                 |

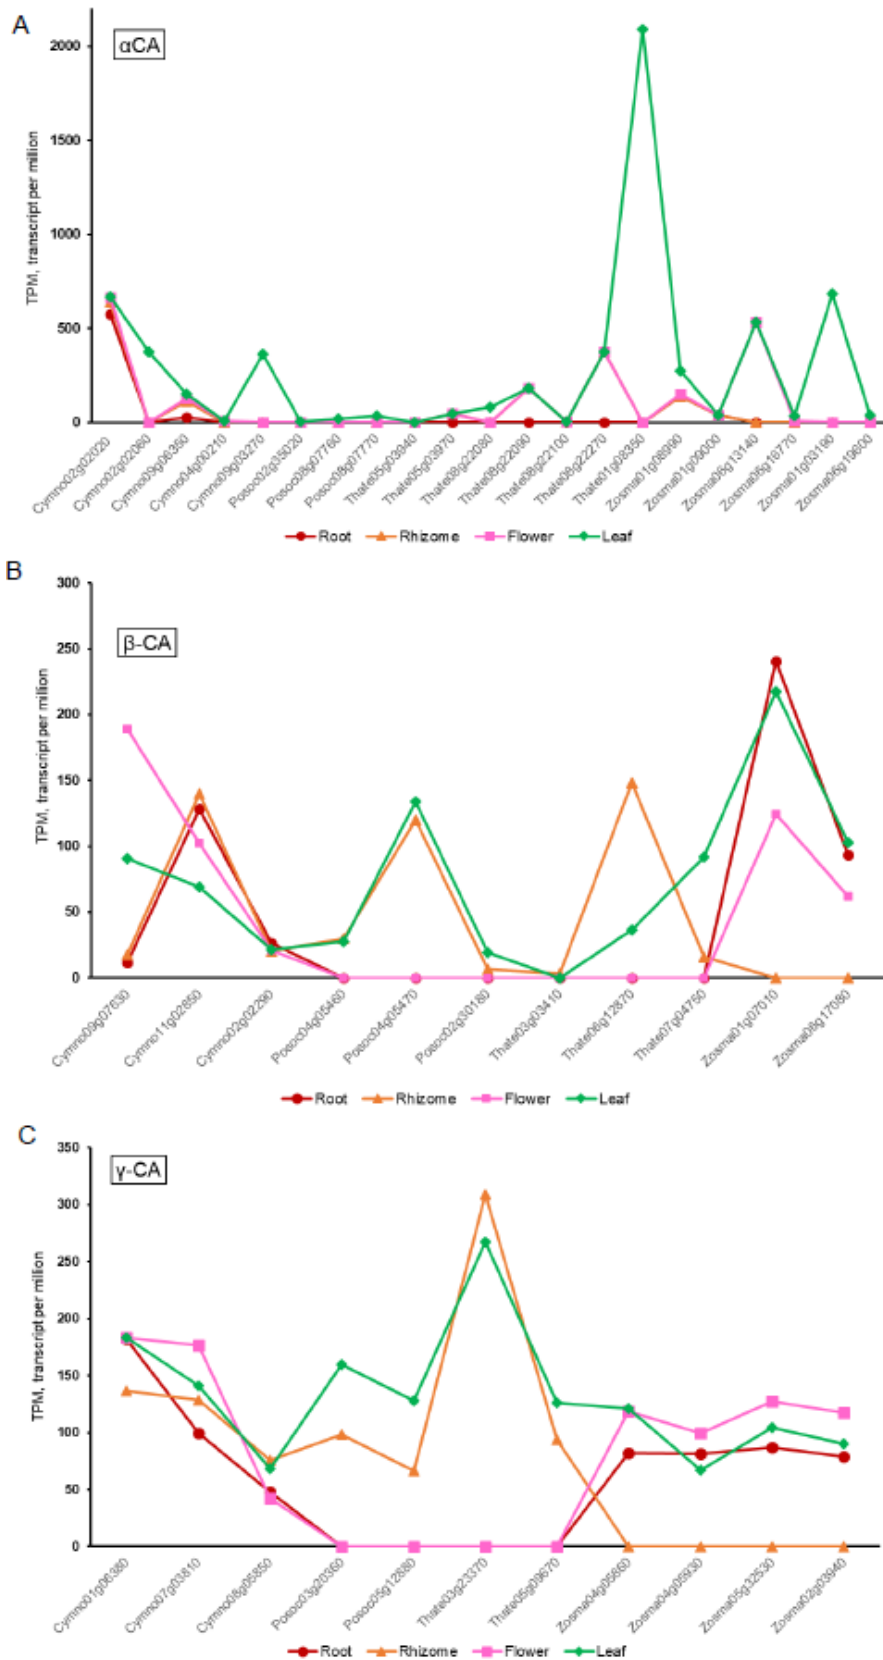

739  
740  
741  
742

**Supplementary Figure 5.6.1** Differential expression of  $\alpha$ -CA,  $\beta$ -CA and  $\lambda$ -CA in root, rhizome, flower, and leaf tissues of the studied seagrass species.

743 **Supplementary Note 5.6.2 Photosynthesis**

744 Seagrasses face different light environments according to the depth and latitude where they live. Irradiance  
745 decreases with depth, and light quality is also altered along the water column. In order to investigate if the  
746 adaptation to the light environment experienced by seagrasses in their submerged marine life imposed  
747 evolutionary adaptations resulting in expansion/reduction of gene families, the following categories of genes  
748 have been analyzed (from KEGG Photosynthesis Proteins - *Arabidopsis thaliana*): Photosystem and electron  
749 transport system: Photosystem II (P680 chlorophyll a); Photosystem I (P700 chlorophyll a); Cytochrome b6/f  
750 complex; Photosynthetic electron transport; F-type ATPase; Antenna proteins: Light-harvesting chlorophyll-  
751 protein complex A and B (*LHCA*, *LHCB*). The total number of genes present in the orthology groups for the  
752 investigated gene families are presented in the Supplementary Figure 5.6.2. In comparison with the other  
753 Alismatales, seagrasses have a noteworthy expansion in genes of the *psA/psB* complexes and of the *LHCB*.  
754 Looking at the last group (*LHCB*) in particular, *Posidonia*, *Thalassia* and *Zostera* have a clear expansion in  
755 comparison to *Cymodocea*, which could be related to the larger depth gradient experienced by the formers.  
756 Genes for the *psA/psB* complexes are coded by the plastid genome, as well as for the Cytochrome b6/f complex  
757 and the F-type ATPase. Nevertheless, in most of case for seagrass species and for some of the other species  
758 included in the analysis there are also extra copies in the nuclear genome (numbers in red in the Supplementary  
759 Figure 5.6.2). *T. testudinum*, for example, has 6 nuclear copies of *psbA*. Nevertheless, nuclear copies of  
760 chloroplast genes are not expressed. See for example genes for the Cyt b6/f complex in *C. nodosa* and *Z. marina*  
761 leaf and flower tissues (Supplementary Figure 5.6.3 A and B).

762 Seagrass species analyzed feature different floral morphology. For two species (*Z. marina* and *C. nodosa*) gene  
763 expression data have been obtained also from floral tissue. Results indicate that *Zostera* flowers are  
764 photosynthetically active, while *Cymodocea* flowers are not. *LHCs* seem to be active at the same levels of leaf  
765 tissue while electron transport genes express at a lower level (Supplementary Figure 5.6.3 C and D).

766 In *Z. marina*, photosynthesis occurs mainly in pistillate (“female”) flowers. This could be due to the maturation  
767 timing of staminate (“male”) and pistillate flowers, as suggested for *P. oceanica*, where it was also found that  
768 only pistillate flowers expressed photosynthetic genes (Entrambasaguas et al. 2017).

769

|                            | Orthogroup  | Gene name    | Seagrasses  |    |    |    | Freshwater species |    |    | Mangrove |    | Moconots |    |    |    |    | Eudicots |    |    |    |    |    |    | ATR |    |
|----------------------------|-------------|--------------|-------------|----|----|----|--------------------|----|----|----------|----|----------|----|----|----|----|----------|----|----|----|----|----|----|-----|----|
|                            |             |              | CN          | PO | TT | ZM | PA                 | SP | WA | AM       | RA | OS       | BD | AC | EG | AO | BV       | UG | SL | CC | VV | PT | AT |     | TC |
| Psa                        | OG0001413   | <i>PsaA</i>  | 2           | 4  | 2  | 2  | 0                  | 0  | 0  | 0        | 1  | 5        | 3  | 1  | 0  | 0  | 5        | 4  | 16 | 1  | 2  | 6  | 1  | 0   | 0  |
|                            | OG0004325   | <i>PsaB</i>  | 1           | 1  | 3  | 1  | 0                  | 1  | 0  | 0        | 3  | 3        | 2  | 2  | 0  | 0  | 7        | 2  | 4  | 0  | 2  | 1  | 1  | 0   | 0  |
|                            | OG0012100   | <i>PsaC</i>  | 1           | 1  | 1  | 1  | 0                  | 0  | 0  | 0        | 0  | 3        | 2  | 1  | 0  | 0  | 1        | 0  | 1  | 0  | 1  | 1  | 1  | 0   | 0  |
|                            | OG0004391   | <i>PsaD2</i> | 1           | 1  | 1  | 1  | 4                  | 1  | 1  | 2        | 2  | 1        | 1  | 1  | 0  | 1  | 1        | 2  | 1  | 0  | 1  | 2  | 2  | 2   | 1  |
|                            | OG0004272   | <i>PsaE</i>  | 2           | 1  | 2  | 1  | 4                  | 2  | 0  | 1        | 2  | 1        | 1  | 1  | 1  | 0  | 1        | 3  | 2  | 1  | 1  | 1  | 2  | 2   | 1  |
|                            | OG0006616   | <i>PsaF</i>  | 1           | 1  | 1  | 2  | 2                  | 2  | 2  | 2        | 2  | 1        | 1  | 1  | 0  | 0  | 1        | 2  | 1  | 0  | 1  | 1  | 1  | 1   | 1  |
|                            | OG0012149   | <i>PsaI</i>  | 1           | 1  | 1  | 1  | 0                  | 2  | 0  | 0        | 0  | 0        | 4  | 0  | 0  | 0  | 0        | 0  | 2  | 0  | 1  | 1  | 1  | 0   | 0  |
|                            | OG0012852   | <i>PsaJ</i>  | 1           | 1  | 1  | 1  | 0                  | 1  | 0  | 0        | 0  | 0        | 3  | 0  | 0  | 0  | 0        | 0  | 2  | 0  | 0  | 1  | 1  | 0   | 0  |
|                            | OG0006947   | <i>PsaO</i>  | 1           | 1  | 1  | 1  | 1                  | 1  | 1  | 1        | 1  | 1        | 1  | 1  | 1  | 1  | 2        | 1  | 1  | 1  | 1  | 2  | 1  | 1   | 2  |
|                            | OG0008605   | <i>PsaK</i>  | 1           | 1  | 1  | 1  | 1                  | 1  | 1  | 1        | 1  | 1        | 1  | 2  | 1  | 0  | 1        | 1  | 1  | 1  | 1  | 2  | 1  | 1   | 1  |
|                            | OG0006761   | <i>PsaL</i>  | 1           | 1  | 1  | 1  | 1                  | 1  | 1  | 1        | 1  | 1        | 1  | 1  | 1  | 1  | 1        | 2  | 2  | 1  | 1  | 2  | 1  | 2   | 1  |
|                            | OG0007957   | <i>PsaG</i>  | 1           | 1  | 1  | 1  | 2                  | 1  | 1  | 1        | 1  | 1        | 1  | 0  | 2  | 0  | 3        | 2  | 1  | 0  | 1  | 2  | 1  | 0   | 1  |
|                            | OG0005369   | <i>PsaH</i>  | 1           | 1  | 1  | 1  | 1                  | 1  | 1  | 1        | 2  | 2        | 1  | 1  | 2  | 1  | 1        | 1  | 3  | 1  | 1  | 1  | 2  | 1   | 1  |
|                            | OG0010572   | <i>PsaN*</i> | 1           | 1  | 1  | 1  | 1                  | 1  | 1  | 1        | 0  | 1        | 1  | 1  | 0  | 0  | 1        | 1  | 1  | 1  | 1  | 2  | 1  | 1   | 1  |
|                            | OG0010507   | <i>PsaN*</i> | 0           | 1  | 1  | 1  | 1                  | 1  | 1  | 1        | 1  | 0        | 1  | 2  | 1  | 1  | 1        | 0  | 0  | 1  | 1  | 2  | 1  | 1   | 1  |
|                            | OG0003908   | <i>PsaP</i>  | 2           | 2  | 1  | 1  | 2                  | 2  | 1  | 1        | 2  | 2        | 2  | 2  | 2  | 2  | 1        | 1  | 1  | 1  | 1  | 2  | 1  | 1   | 1  |
|                            | Psb         | OG0001201    | <i>psbA</i> | 2  | 1  | 7  | 2                  | 0  | 2  | 3        | 0  | 3        | 5  | 3  | 4  | 1  | 0        | 6  | 3  | 11 | 1  | 1  | 2  | 1   | 0  |
| OG0001495                  |             | <i>psbB</i>  | 1           | 3  | 1  | 2  | 0                  | 1  | 1  | 0        | 4  | 5        | 7  | 6  | 1  | 1  | 9        | 1  | 3  | 0  | 2  | 3  | 1  | 0   | 1  |
| OG0003337                  |             | <i>psbC</i>  | 1           | 1  | 2  | 2  | 0                  | 1  | 2  | 0        | 0  | 3        | 2  | 1  | 0  | 0  | 6        | 2  | 7  | 0  | 2  | 2  | 1  | 0   | 1  |
| OG0008341                  |             | <i>psbD*</i> | 1           | 1  | 2  | 2  | 0                  | 1  | 0  | 0        | 0  | 3        | 2  | 0  | 0  | 0  | 3        | 2  | 2  | 0  | 2  | 2  | 1  | 0   | 1  |
| OG0022354                  |             | <i>psbD*</i> | 0           | 0  | 0  | 2  | 0                  | 0  | 0  | 0        | 0  | 0        | 0  | 0  | 0  | 0  | 0        | 0  | 1  | 0  | 0  | 0  | 0  | 0   | 0  |
| OG0008317                  |             | <i>psbE</i>  | 1           | 1  | 1  | 2  | 0                  | 1  | 0  | 0        | 0  | 3        | 5  | 1  | 0  | 0  | 5        | 0  | 1  | 0  | 1  | 1  | 1  | 0   | 1  |
| OG0013128                  |             | <i>psbF</i>  | 1           | 1  | 1  | 1  | 0                  | 1  | 0  | 0        | 0  | 0        | 3  | 0  | 0  | 0  | 0        | 0  | 1  | 0  | 0  | 1  | 1  | 0   | 0  |
| OG0013809                  |             | <i>psbL</i>  | 1           | 1  | 1  | 1  | 0                  | 0  | 0  | 0        | 0  | 0        | 3  | 0  | 0  | 0  | 0        | 0  | 0  | 0  | 0  | 1  | 1  | 0   | 0  |
| OG0013127                  |             | <i>psbJ</i>  | 1           | 1  | 1  | 1  | 0                  | 0  | 0  | 0        | 0  | 0        | 4  | 0  | 0  | 1  | 0        | 0  | 1  | 0  | 0  | 0  | 1  | 0   | 0  |
| OG0010941                  |             | <i>psbH</i>  | 1           | 1  | 1  | 3  | 0                  | 1  | 0  | 0        | 0  | 4        | 1  | 0  | 0  | 0  | 0        | 0  | 1  | 0  | 0  | 3  | 1  | 0   | 0  |
| OG0013442                  |             | <i>psbI</i>  | 1           | 1  | 1  | 1  | 0                  | 0  | 0  | 0        | 0  | 0        | 1  | 0  | 0  | 0  | 0        | 0  | 1  | 1  | 0  | 2  | 1  | 0   | 0  |
| OG0011920                  |             | <i>psbK</i>  | 1           | 1  | 1  | 2  | 0                  | 0  | 0  | 0        | 0  | 4        | 0  | 4  | 0  | 0  | 0        | 0  | 0  | 0  | 1  | 1  | 1  | 0   | 0  |
| OG0013443                  |             | <i>psbM</i>  | 1           | 1  | 1  | 1  | 0                  | 0  | 0  | 0        | 0  | 0        | 1  | 0  | 0  | 0  | 0        | 0  | 1  | 1  | 0  | 2  | 1  | 0   | 0  |
| OG0005164                  |             | <i>psbO</i>  | 2           | 1  | 1  | 1  | 1                  | 1  | 1  | 2        | 1  | 1        | 1  | 1  | 2  | 1  | 1        | 2  | 2  | 1  | 1  | 2  | 2  | 1   | 1  |
| OG0009830                  |             | <i>psbP*</i> | 1           | 1  | 1  | 0  | 1                  | 1  | 1  | 1        | 0  | 1        | 1  | 1  | 2  | 1  | 1        | 1  | 1  | 1  | 1  | 1  | 1  | 1   | 1  |
| OG0007493                  |             | <i>psbP*</i> | 1           | 1  | 1  | 1  | 1                  | 1  | 1  | 1        | 1  | 2        | 1  | 1  | 1  | 1  | 1        | 1  | 1  | 1  | 1  | 2  | 1  | 1   | 1  |
| OG0003480                  |             | <i>psbP*</i> | 2           | 1  | 1  | 2  | 3                  | 1  | 1  | 3        | 0  | 1        | 1  | 3  | 3  | 2  | 1        | 2  | 1  | 1  | 1  | 2  | 1  | 1   | 1  |
| OG0011018                  |             | <i>psbQ*</i> | 1           | 0  | 0  | 0  | 1                  | 1  | 1  | 1        | 1  | 1        | 1  | 1  | 1  | 1  | 1        | 0  | 1  | 1  | 1  | 1  | 1  | 1   | 1  |
| OG0010574                  |             | <i>psbQ*</i> | 1           | 0  | 0  | 1  | 1                  | 0  | 1  | 1        | 1  | 1        | 1  | 2  | 1  | 1  | 1        | 1  | 1  | 1  | 1  | 1  | 1  | 1   | 1  |
| OG0005668                  |             | <i>psbQ*</i> | 1           | 1  | 1  | 1  | 2                  | 3  | 1  | 1        | 1  | 1        | 1  | 1  | 2  | 0  | 1        | 2  | 1  | 1  | 1  | 2  | 2  | 1   | 1  |
| OG0003547                  |             | <i>psbR</i>  | 1           | 2  | 2  | 1  | 2                  | 1  | 1  | 2        | 1  | 3        | 3  | 1  | 2  | 1  | 1        | 2  | 1  | 1  | 4  | 1  | 1  | 1   | 1  |
| OG0005051                  |             | <i>psbS</i>  | 1           | 2  | 1  | 1  | 2                  | 2  | 1  | 1        | 2  | 3        | 1  | 1  | 1  | 1  | 2        | 1  | 1  | 1  | 1  | 1  | 1  | 1   | 1  |
| OG0012853                  |             | <i>psbT</i>  | 1           | 1  | 1  | 1  | 0                  | 1  | 0  | 0        | 0  | 0        | 3  | 0  | 0  | 0  | 0        | 0  | 0  | 0  | 0  | 3  | 1  | 0   | 0  |
| OG0003259                  |             | <i>psbW</i>  | 1           | 1  | 1  | 1  | 2                  | 2  | 2  | 2        | 2  | 2        | 2  | 1  | 2  | 2  | 1        | 2  | 1  | 2  | 2  | 2  | 1  | 3   | 1  |
| OG0007350                  |             | <i>psbY</i>  | 1           | 1  | 1  | 1  | 1                  | 2  | 1  | 0        | 2  | 1        | 1  | 0  | 2  | 1  | 1        | 3  | 1  | 1  | 0  | 2  | 1  | 1   | 1  |
| OG0011749                  |             | <i>psbZ</i>  | 1           | 1  | 1  | 1  | 0                  | 1  | 0  | 0        | 0  | 4        | 1  | 2  | 0  | 0  | 0        | 0  | 3  | 0  | 0  | 1  | 1  | 0   | 0  |
| OG0007852                  |             | <i>psbZ7</i> | 1           | 1  | 1  | 1  | 1                  | 1  | 0  | 2        | 1  | 1        | 1  | 2  | 1  | 1  | 0        | 2  | 1  | 1  | 1  | 2  | 1  | 1   | 1  |
| OG0008772                  |             | <i>psbZ8</i> | 1           | 1  | 1  | 1  | 3                  | 1  | 0  | 1        | 1  | 1        | 1  | 1  | 1  | 1  | 1        | 1  | 1  | 1  | 1  | 1  | 1  | 1   | 1  |
| Cytochrome b6/f complex    |             | OG0002741    | <i>petA</i> | 2  | 2  | 2  | 4                  | 0  | 1  | 0        | 0  | 0        | 5  | 6  | 1  | 0  | 0        | 6  | 1  | 3  | 1  | 2  | 2  | 1   | 0  |
|                            | OG0006791   | <i>petB</i>  | 1           | 1  | 1  | 2  | 0                  | 0  | 0  | 0        | 0  | 3        | 5  | 4  | 0  | 0  | 2        | 0  | 3  | 0  | 0  | 4  | 1  | 0   | 0  |
|                            | OG0004917   | <i>petC</i>  | 1           | 1  | 2  | 1  | 4                  | 1  | 2  | 1        | 1  | 1        | 1  | 1  | 1  | 1  | 1        | 1  | 1  | 1  | 3  | 2  | 1  | 1   | 1  |
|                            | OG0008192   | <i>petD</i>  | 1           | 1  | 1  | 1  | 0                  | 2  | 0  | 0        | 0  | 4        | 3  | 2  | 0  | 0  | 4        | 0  | 4  | 0  | 0  | 2  | 1  | 0   | 0  |
|                            | OG0012851   | <i>petG</i>  | 1           | 1  | 1  | 1  | 0                  | 1  | 0  | 0        | 0  | 0        | 4  | 0  | 0  | 0  | 0        | 0  | 1  | 0  | 0  | 1  | 1  | 0   | 0  |
|                            | OG0013129   | <i>petL</i>  | 1           | 1  | 1  | 1  | 0                  | 1  | 0  | 0        | 0  | 0        | 2  | 0  | 0  | 0  | 0        | 0  | 2  | 0  | 1  | 0  | 1  | 0   | 0  |
|                            | OG0005169   | <i>petM</i>  | 1           | 1  | 1  | 1  | 0                  | 2  | 1  | 1        | 2  | 1        | 1  | 1  | 2  | 1  | 1        | 3  | 1  | 1  | 1  | 4  | 1  | 1   | 1  |
| OG0013068                  | <i>petN</i> | 1            | 1           | 1  | 1  | 0  | 1                  | 0  | 0  | 0        | 0  | 3        | 1  | 0  | 0  | 1  | 0        | 0  | 0  | 0  | 0  | 1  | 0  | 0   |    |
| Photosynthetic e-transport | OG0003691   | <i>petE</i>  | 0           | 3  | 1  | 2  | 2                  | 2  | 1  | 2        | 1  | 1        | 1  | 1  | 2  | 3  | 1        | 1  | 1  | 2  | 1  | 2  | 2  | 1   | 1  |
|                            | OG0000289   | <i>petF*</i> | 2           | 3  | 2  | 1  | 12                 | 2  | 12 | 5        | 2  | 5        | 6  | 5  | 5  | 3  | 3        | 3  | 7  | 4  | 1  | 7  | 4  | 2   | 3  |
|                            | OG0008036   | <i>petF*</i> | 1           | 1  | 1  | 1  | 1                  | 1  | 2  | 1        | 1  | 1        | 1  | 1  | 2  | 1  | 1        | 1  | 1  | 1  | 1  | 1  | 1  | 1   | 1  |
|                            | OG0009442   | <i>petF*</i> | 1           | 1  | 1  | 1  | 1                  | 0  | 2  | 1        | 1  | 1        | 1  | 1  | 1  | 0  | 1        | 1  | 1  | 1  | 1  | 2  | 1  | 1   | 1  |
|                            | OG0004729   | <i>petH</i>  | 1           | 1  | 1  | 1  | 2                  | 1  | 1  | 1        | 1  | 2        | 2  | 1  | 1  | 2  | 1        | 1  | 2  | 1  | 2  | 2  | 2  | 1   | 1  |
| OG0006612                  | <i>petJ</i> | 1            | 1           | 1  | 1  | 1  | 1                  | 2  | 2  | 1        | 1  | 1        | 4  | 1  | 1  | 0  | 0        | 2  | 1  | 1  | 1  | 1  | 1  | 1   |    |
| F-type ATPase              | OG0000400   | <i>atpA</i>  | 1           | 6  | 9  | 1  | 1                  | 1  | 3  | 0        | 7  | 7        | 2  | 9  | 1  | 1  | 13       | 3  | 11 | 2  | 1  | 4  | 3  | 1   | 1  |
|                            | OG0001351   | <i>atpB</i>  | 2           | 2  | 1  | 7  | 0                  | 0  | 1  | 0        | 2  | 6        | 5  | 3  | 0  | 0  | 7        | 2  | 3  | 1  | 0  | 2  | 1  | 0   | 9  |
|                            | OG0005914   | <i>atpD</i>  | 2           | 1  | 1  | 1  | 2                  | 1  | 1  | 1        | 2  | 1        | 1  | 1  | 2  | 1  | 1        | 1  | 1  | 1  | 1  | 2  | 1  | 1   | 1  |
|                            | OG0006895   | <i>atpE</i>  | 1           | 2  | 1  | 3  | 0                  | 0  | 0  | 0        | 0  | 5        | 5  | 1  | 0  | 1  |          |    |    |    |    |    |    |     |    |

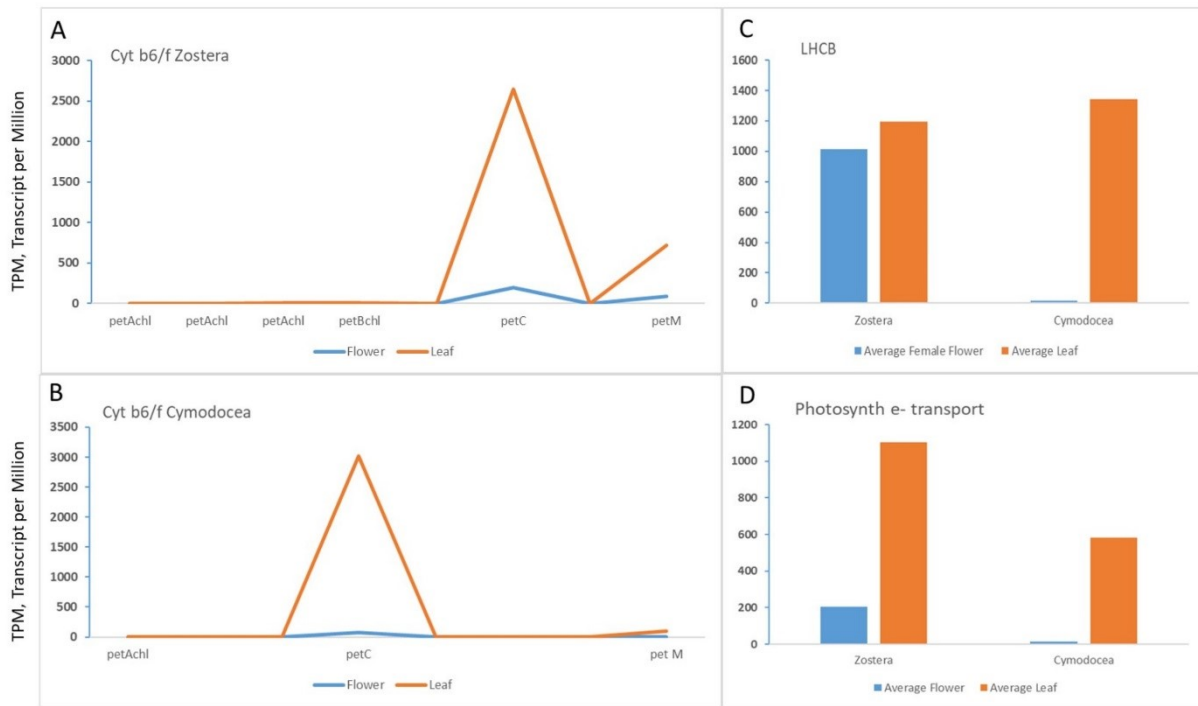

782

### 783 **Supplementary Figure 5.6.3** Differential expression of Cyt b6/f complex, LHCb and electron transport 784 genes in *Z. marina* and *C. nodosa*.

785 A, B: expression of nuclear copies of chloroplast genes (*chl*) and of nuclear genes in leaf and flower tissue. C, D:  
786 comparison between gene expression in leaf and flower tissue.

787

### 788 **Supplementary Note 5.6.3** Light Signaling & Circadian Clock

789 Seagrasses mostly conserved the full repertoire of orthologous genes for photosensory proteins and signalling  
790 systems, evolved in the green lineage during the different stages of plant terrestrialization (Supplementary  
791 Figure 5.6.4) (Han et al. 2019; Jing and Lin 2020). Seagrasses conserved genes for all the three classes of  
792 photoreceptors UV-A/Blue, UV-B and RED/FAR-RED typical of higher plants, with few exceptions (Supplementary  
793 Figure 5.6.4) as well as at least one ortholog for each of the three main classes of UVA/Blue photoreceptors, that  
794 are Phototropins (*PHOT*), Cryptochromes (*CRY*) and the LOV/F-box protein (*FKF/LKP/ZTL*) (Supplementary Figure  
795 5.6.4).

796 The UV-B receptor (UVB-Resistance 8) that is already known to be absent in *Z. marina* is still present in the other  
797 three species although the predicted protein sequence of *UVR8* in *P. oceanica* has a shorter N terminus  
798 compared to other species (data not shown) and lacks the C27 domain (Supplementary Figure 5.6.5). This is a  
799 region of 27 amino acids from the C terminus that mediates the interaction with proteins repressor of  
800 photomorphogenesis 1, 2 (*RUP1* and *RUP2*) (Yin et al. 2015), two proteins belonging to UV-B signalling including  
801 UV-B acclimation and tolerance. *RUP1* and *RUP2* are missing in the *Z. marina* genome (Supplementary Figure  
802 5.6.4). These observations indicate that UV-B tolerance and the downstream regulation signalling pathways vary  
803 among species and are related to the relative light habitat features.

804 Red/far-red photoreceptors (Phytochromes) are present in a variety of organisms (Rockwell and Lagarias 2020).  
805 The phytochrome structure in plants is highly conserved, showing the same domain architecture in all members  
806 of the streptophyte (charophyte algae and land plants) PHY1/2 lineage, having originated in a common ancestor



807 (Li et al. 2015; Rockwell and Lagarias 2020). In some algal lineages, such as Zygnematales and Coleochaetales,  
808 phytochromes also show non-canonical forms (Li et al.2015). In seed plants, phytochromes underwent lineage-  
809 specific gene duplications, leading to three main forms (phyA, phyB, phyC), plus two additional forms (phyD and  
810 phyE), which are restricted to some taxa (Mathews 2010). The number of phytochromes varies among species:  
811 eudicots tend to have two or three phytochromes genes (up to five *PHYA-PHYE* in *A.thaliana*), while monocots  
812 tend to have a lower number of genes, generally only one gene for *PHYA* and one for *PHYB*. The transition to a  
813 submerged marine environment did not lead to a general reduction of phytochrome genes (Supplementary  
814 Figure 5.6.4); indeed, all the four species investigated possess at least one gene for phytochrome A (*PHYA*) and  
815 phytochrome B (*PHYB*) while *P. oceanica* and *T. testudinum* also possess an orthologous gene for *PHYC*.  
816 Furthermore, *P. oceanica* and *C. nodosa* have a unique orthologous cluster (OG0026441) for a Phytochrome E  
817 (*PHYE*) (Supplementary Figure 5.6.6) often absent in monocotyledonous plants (Smith 2000; Mathews 2006).  
818 After WDG and WGT, *P. oceanica* and *C. nodosa* as well as *P. acutifolius* retained duplicated genes for *CRY* or  
819 *PHOTs* (Supplementary Figure 5.6.4) while *P. oceanica* and *P. acutifolius* also for *ZTL/FKF1*.

820 Components of the downstream light signaling pathways such phytochrome interacting factors (*PIFs*),  
821 constitutive photomorphogenic protein 1 (*COP1*) and elongated hypocotyl 5 (*HY5*) are still present  
822 (Supplementary Figure 5.6.4) with several orthologous genes comparable with other aquatic and land species.  
823 Also, the repertoire of transcription factors essential for photomorphogenesis and seed emergence, like the far-  
824 red elongated hypocotyl 1,3 (*FHY1/3*), far-red-impaired response1 (*FAR1*) and long after far-red light 1 (*LAF1*) is  
825 the one typical of land angiosperms. However, further functional studies must investigate if those genes have  
826 also conserved the same pattern of expression of land plants, especially during critical stages of seed setting and  
827 plant development.

828 Perception of surrounding light cues is critical also for the entrainment of the circadian clock system. The  
829 circadian clock regulates a plethora of processes that affect physiology and life cycle in plants, such as daily  
830 water and carbon availability and hormone signalling pathways (McClung 2019). All seagrass species, apart from  
831 *T. testudinum*, lost ortholog genes for *Timing of Cab* (*TOC1*) (Supplementary Figure 5.6.4). *TOC1* is one of the  
832 key clockwork components of the evening transcriptional-translational loop (Harmer 2009) belonging to the  
833 PSEUDO RESPONSE REGULATOR (*PRR*) family with a crucial function in the integration of light signals to the  
834 circadian control (Pokhilko et al. 2013). *TOC1* has also a central role in adapting plant physiology to drought  
835 (Legnaioli et al. 2009; Wang et al. 2020) and in regulating the day-night energy metabolism (Cervela-Cardona et  
836 al. 2021). Remarkably, *TOC1* is also lost in the freshwater *P. acutifolius* and *W. australiana*, the latter showing a  
837 reduced circadian time control of gene expression in comparison with *Arabidopsis* (Michael et al. 2021). The loss  
838 of some genes related to the circadian system in a large part of marine and freshwater species can suggest that,  
839 in the aquatic environment, the absence of some environmental stressors typical of land habitats, such as water  
840 deficit, has led to a reduction of the regulative constraints for daily management of some metabolic and  
841 developmental plant processes. Further functional studies could highlight changes in regulative networks  
842 mediated by circadian clock genes and their implication for seagrass adaptation to marine environments.

843 *C. nodosa*, *P. oceanica* and *T. testudinum* retained, after WGT and WGD events, one gene each related to the  
844 circadian clock and photoperiodism, respectively *LNK1*, *ZTL* and *GI* (Supplementary Figure 5.6.4).

845

|                                         | Orthogroup                                              | Gene name                 | Seagrasses        |    |    |    | Freshwater species |    |    | Mangrove |    | Moconots |    |    |    |    | Eudicots |    |    |    |    |    |    |    | ATR |   |   |
|-----------------------------------------|---------------------------------------------------------|---------------------------|-------------------|----|----|----|--------------------|----|----|----------|----|----------|----|----|----|----|----------|----|----|----|----|----|----|----|-----|---|---|
|                                         |                                                         |                           | CN                | PO | TT | ZM | PA                 | SP | WA | AM       | RA | OS       | BD | AC | EG | AO | BV       | UG | SL | CC | VV | PT | AT | TC |     |   |   |
| Gene families containing photoreceptors | OG0007303                                               | <i>PHYA</i>               | 1                 | 1  | 1  | 1  | 1                  | 1  | 1  | 2        | 1  | 1        | 2  | 1  | 1  | 1  | 1        | 1  | 1  | 1  | 1  | 1  | 1  | 1  | 1   | 1 |   |
|                                         | OG0003273                                               | <i>PHYB/E</i>             | 1                 | 1  | 1  | 1  | 1                  | 1  | 1  | 2        | 3  | 1        | 1  | 1  | 2  | 1  | 1        | 4  | 3  | 1  | 2  | 2  | 3  | 2  | 1   | 1 |   |
|                                         | OG0026441                                               | <i>PHYE</i>               | 1                 | 1  | 0  | 0  | 0                  | 0  | 0  | 0        | 0  | 0        | 0  | 0  | 0  | 0  | 0        | 0  | 0  | 0  | 0  | 0  | 0  | 0  | 0   | 0 |   |
|                                         | OG0011336                                               | <i>PHYC</i>               | 0                 | 1  | 1  | 0  | 1                  | 1  | 1  | 2        | 1  | 1        | 1  | 1  | 1  | 1  | 1        | 1  | 0  | 1  | 1  | 1  | 0  | 1  | 1   | 0 |   |
|                                         | OG0008432                                               | <i>UVR8</i>               | 1                 | 1  | 1  | 0  | 0                  | 1  | 1  | 2        | 1  | 2        | 2  | 1  | 1  | 2  | 1        | 1  | 1  | 1  | 1  | 1  | 1  | 1  | 1   | 1 |   |
|                                         | OG0004552                                               | <i>CRY1</i>               | 2                 | 1  | 1  | 1  | 1                  | 1  | 1  | 3        | 2  | 2        | 2  | 1  | 2  | 1  | 1        | 1  | 2  | 1  | 1  | 2  | 1  | 1  | 1   | 1 |   |
|                                         | OG0006828                                               | <i>CRY2</i>               | 1                 | 2  | 2  | 0  | 1                  | 1  | 2  | 2        | 1  | 1        | 1  | 2  | 1  | 1  | 1        | 1  | 1  | 1  | 1  | 1  | 1  | 1  | 1   | 1 |   |
|                                         | OG0010438                                               | <i>CRY3</i>               | 1                 | 1  | 1  | 0  | 1                  | 1  | 1  | 0        | 1  | 1        | 1  | 1  | 1  | 2  | 1        | 0  | 1  | 2  | 1  | 1  | 1  | 1  | 1   | 1 |   |
|                                         | OG0001443                                               | <i>PHOT1, PHOT2</i>       | 3                 | 3  | 2  | 2  | 2                  | 2  | 4  | 2        | 2  | 3        | 2  | 2  | 2  | 2  | 2        | 2  | 2  | 2  | 2  | 3  | 2  | 2  | 2   | 2 |   |
|                                         | OG0006742                                               | <i>PAS/LOV</i>            | 1                 | 1  | 1  | 1  | 1                  | 1  | 1  | 2        | 1  | 1        | 1  | 2  | 2  | 1  | 1        | 0  | 2  | 1  | 1  | 2  | 1  | 1  | 1   | 1 |   |
|                                         | OG0003641                                               | <i>ZTL, ADO1</i>          | 1                 | 2  | 2  | 1  | 2                  | 2  | 1  | 4        | 1  | 2        | 2  | 1  | 2  | 2  | 1        | 1  | 1  | 1  | 1  | 2  | 1  | 1  | 1   | 1 |   |
|                                         | OG0017621                                               | <i>ADO2</i>               | 0                 | 1  | 0  | 0  | 0                  | 0  | 0  | 0        | 1  | 0        | 0  | 1  | 0  | 0  | 0        | 0  | 0  | 0  | 0  | 0  | 0  | 0  | 0   | 0 |   |
|                                         | OG0010351                                               | <i>FKF1, ADO3</i>         | 1                 | 1  | 1  | 0  | 2                  | 1  | 2  | 1        | 1  | 1        | 1  | 0  | 1  | 0  | 1        | 0  | 1  | 1  | 1  | 2  | 1  | 1  | 1   | 1 |   |
|                                         | OG0006492                                               | <i>RUP1, RUP2</i>         | 1                 | 3  | 1  | 0  | 1                  | 1  | 1  | 4        | 1  | 1        | 1  | 1  | 1  | 1  | 0        | 1  | 1  | 1  | 1  | 2  | 2  | 1  | 1   | 1 |   |
|                                         | OG0002079                                               | <i>HYS</i>                | 3                 | 2  | 1  | 1  | 2                  | 3  | 2  | 3        | 2  | 2        | 3  | 3  | 3  | 2  | 1        | 1  | 1  | 1  | 2  | 3  | 2  | 1  | 1   | 2 |   |
|                                         | OG0003554                                               | <i>COP1</i>               | 1                 | 1  | 1  | 2  | 1                  | 1  | 1  | 3        | 2  | 1        | 1  | 1  | 1  | 1  | 2        | 2  | 2  | 2  | 2  | 3  | 1  | 2  | 1   | 1 |   |
|                                         | OG0004587                                               | <i>SPA1</i>               | 1                 | 1  | 1  | 1  | 1                  | 1  | 1  | 2        | 1  | 1        | 1  | 1  | 2  | 1  | 2        | 0  | 2  | 2  | 2  | 3  | 2  | 2  | 1   | 1 |   |
|                                         | OG0002845                                               | <i>COR28</i>              | 2                 | 2  | 2  | 1  | 0                  | 0  | 2  | 2        | 2  | 3        | 2  | 2  | 3  | 1  | 1        | 2  | 1  | 1  | 3  | 2  | 2  | 1  | 1   | 1 |   |
|                                         | OG0008799                                               | <i>CSU2</i>               | 1                 | 1  | 1  | 1  | 1                  | 1  | 1  | 1        | 1  | 1        | 1  | 1  | 1  | 1  | 1        | 1  | 1  | 2  | 1  | 1  | 1  | 1  | 1   | 1 |   |
|                                         | OG0010907                                               | <i>COP10</i>              | 1                 | 1  | 1  | 1  | 0                  | 1  | 1  | 1        | 1  | 1        | 1  | 1  | 1  | 1  | 1        | 1  | 1  | 1  | 0  | 1  | 1  | 1  | 1   | 0 |   |
|                                         | OG0009317                                               | <i>DET1</i>               | 1                 | 1  | 1  | 1  | 0                  | 1  | 1  | 1        | 1  | 1        | 1  | 1  | 2  | 1  | 1        | 1  | 1  | 1  | 1  | 1  | 1  | 1  | 1   | 1 |   |
|                                         | OG0004432                                               | <i>DDB1B</i>              | 1                 | 1  | 1  | 1  | 6                  | 1  | 1  | 2        | 1  | 2        | 2  | 1  | 2  | 1  | 2        | 0  | 1  | 0  | 1  | 1  | 2  | 1  | 1   | 1 |   |
|                                         | OG0003768                                               | <i>PIF3/15</i>            | 2                 | 1  | 1  | 1  | 0                  | 1  | 2  | 3        | 3  | 0        | 1  | 2  | 3  | 3  | 1        | 1  | 1  | 1  | 1  | 3  | 1  | 2  | 1   | 1 |   |
|                                         | OG0016987                                               | <i>PIF-like 15</i>        | 1                 | 0  | 0  | 1  | 0                  | 0  | 0  | 0        | 0  | 0        | 0  | 0  | 0  | 0  | 0        | 0  | 0  | 0  | 0  | 0  | 0  | 0  | 0   | 0 |   |
|                                         | OG0009778                                               | <i>PIF-like 15</i>        | 2                 | 2  | 2  | 3  | 4                  | 1  | 0  | 0        | 0  | 2        | 2  | 3  | 0  | 0  | 0        | 0  | 0  | 0  | 1  | 0  | 1  | 0  | 1   | 0 |   |
|                                         | OG0009607                                               | <i>PIF-like 13</i>        | 2                 | 2  | 0  | 0  | 1                  | 2  | 1  | 0        | 0  | 4        | 2  | 1  | 0  | 2  | 1        | 1  | 0  | 0  | 1  | 0  | 3  | 0  | 1   | 1 |   |
|                                         | OG0004930                                               | <i>PIF-like 13</i>        | 2                 | 2  | 2  | 0  | 0                  | 1  | 2  | 1        | 1  | 1        | 2  | 3  | 2  | 4  | 0        | 1  | 1  | 1  | 1  | 2  | 2  | 1  | 0   | 1 |   |
|                                         | OG0007588                                               | <i>UNE10</i>              | 1                 | 1  | 1  | 0  | 0                  | 0  | 1  | 3        | 2  | 1        | 1  | 1  | 2  | 1  | 1        | 0  | 2  | 1  | 2  | 2  | 1  | 1  | 1   | 1 |   |
|                                         | OG0003522                                               | <i>SRR1</i>               | 1                 | 1  | 5  | 3  | 1                  | 1  | 1  | 1        | 1  | 1        | 1  | 1  | 3  | 1  | 0        | 2  | 1  | 2  | 1  | 3  | 1  | 1  | 1   | 1 |   |
|                                         | OG0006894                                               | <i>FHY1</i>               | 1                 | 1  | 1  | 1  | 1                  | 1  | 1  | 2        | 1  | 1        | 1  | 1  | 2  | 1  | 1        | 0  | 2  | 1  | 1  | 1  | 1  | 1  | 1   | 2 |   |
|                                         | OG0000045                                               | <i>FAR1, FHY3</i>         | 8                 | 8  | 7  | 6  | 6                  | 11 | 6  | 10       | 19 | 22       | 17 | 1  | 0  | 1  | 10       | 0  | 16 | 0  | 9  | 26 | 12 | 17 | 0   | 1 |   |
|                                         | OG0003983                                               | <i>FAR1-related</i>       | 1                 | 2  | 1  | 1  | 1                  | 2  | 1  | 1        | 2  | 1        | 1  | 0  | 0  | 3  | 2        | 0  | 2  | 0  | 3  | 4  | 1  | 2  | 3   | 2 |   |
|                                         | OG0000000                                               | <i>LAF1 (MYB-related)</i> | 31                | 31 | 25 | 20 | 15                 | 20 | 27 | 25       | 10 | 40       | 40 | 38 | 3  | 29 | 26       | 19 | 41 | 28 | 37 | 70 | 44 | 43 | 22  | 3 |   |
|                                         | OG0000541                                               | <i>FT</i>                 | 1                 | 2  | 3  | 4  | 5                  | 3  | 4  | 2        | 2  | 8        | 9  | 5  | 6  | 5  | 2        | 2  | 3  | 3  | 0  | 2  | 2  | 1  | 1   | 1 |   |
|                                         | OG0006964                                               | <i>FRI</i>                | 0                 | 1  | 0  | 0  | 0                  | 2  | 1  | 1        | 1  | 1        | 1  | 1  | 1  | 1  | 0        | 2  | 6  | 1  | 2  | 2  | 1  | 1  | 1   | 1 |   |
|                                         | OG0002154                                               | <i>FRI-like</i>           | 1                 | 1  | 1  | 1  | 1                  | 2  | 2  | 3        | 2  | 3        | 2  | 2  | 3  | 2  | 2        | 2  | 3  | 1  | 2  | 3  | 1  | 3  | 2   | 2 |   |
|                                         | OG0004911                                               | <i>VRNS, VILL1</i>        | 1                 | 1  | 1  | 1  | 1                  | 1  | 1  | 3        | 2  | 2        | 2  | 1  | 1  | 1  | 1        | 2  | 1  | 1  | 2  | 2  | 1  | 1  | 1   | 1 |   |
|                                         | Gene families involved in circadian clock toolkit genes | OG0003641                 | <i>ZTL, ADO1</i>  | 1  | 2  | 2  | 1                  | 2  | 2  | 1        | 4  | 1        | 2  | 2  | 1  | 2  | 2        | 1  | 1  | 1  | 1  | 1  | 2  | 1  | 1   | 1 | 1 |
|                                         |                                                         | OG0017621                 | <i>ADO2</i>       | 0  | 1  | 0  | 0                  | 0  | 0  | 0        | 0  | 1        | 0  | 0  | 1  | 0  | 0        | 0  | 0  | 0  | 0  | 0  | 0  | 1  | 0   | 0 | 0 |
|                                         |                                                         | OG0010351                 | <i>FKF1, ADO3</i> | 1  | 1  | 1  | 0                  | 2  | 1  | 2        | 1  | 1        | 1  | 1  | 0  | 1  | 0        | 1  | 0  | 1  | 1  | 1  | 2  | 1  | 1   | 1 | 1 |
|                                         |                                                         | OG0003077                 | <i>LHY/CCA1</i>   | 2  | 1  | 2  | 1                  | 2  | 2  | 2        | 1  | 2        | 1  | 1  | 2  | 3  | 1        | 1  | 5  | 1  | 1  | 1  | 2  | 2  | 1   | 1 | 1 |
|                                         |                                                         | OG0010029                 | <i>TOC1</i>       | 0  | 0  | 1  | 0                  | 0  | 1  | 0        | 2  | 2        | 1  | 1  | 2  | 1  | 1        | 1  | 2  | 2  | 1  | 1  | 1  | 1  | 1   | 1 | 1 |
|                                         |                                                         | OG0010705                 | <i>PRR2</i>       | 1  | 1  | 1  | 0                  | 1  | 1  | 1        | 0  | 2        | 0  | 0  | 1  | 1  | 1        | 1  | 0  | 2  | 1  | 1  | 2  | 1  | 1   | 1 | 1 |
|                                         |                                                         | OG0001611                 | <i>PRR9/5</i>     | 1  | 3  | 2  | 1                  | 2  | 3  | 1        | 3  | 3        | 1  | 1  | 3  | 1  | 5        | 2  | 5  | 2  | 1  | 2  | 4  | 2  | 2   | 1 | 1 |
|                                         |                                                         | OG0003230                 | <i>PRR7/3</i>     | 1  | 1  | 1  | 1                  | 1  | 1  | 1        | 2  | 2        | 2  | 2  | 2  | 2  | 1        | 2  | 0  | 2  | 2  | 3  | 2  | 2  | 3   | 1 | 1 |
| OG0004910                               |                                                         | <i>GI</i>                 | 1                 | 1  | 2  | 1  | 1                  | 1  | 1  | 2        | 2  | 1        | 1  | 1  | 2  | 2  | 1        | 2  | 2  | 1  | 1  | 2  | 1  | 1  | 1   | 1 |   |
| OG0004704                               |                                                         | <i>LUX</i>                | 2                 | 2  | 3  | 1  | 0                  | 1  | 2  | 1        | 1  | 1        | 1  | 1  | 1  | 0  | 2        | 2  | 2  | 1  | 1  | 2  | 2  | 1  | 1   | 1 |   |
| OG0004484                               |                                                         | <i>CO</i>                 | 1                 | 1  | 2  | 0  | 0                  | 1  | 1  | 2        | 2  | 2        | 2  | 2  | 2  | 1  | 1        | 0  | 3  | 1  | 1  | 2  | 3  | 2  | 1   | 1 |   |
| OG0000552                               |                                                         | <i>ELF4</i>               | 1                 | 2  | 1  | 2  | 1                  | 1  | 2  | 5        | 4  | 3        | 3  | 6  | 5  | 0  | 3        | 6  | 6  | 3  | 3  | 7  | 5  | 4  | 2   | 2 |   |
| OG0003752                               |                                                         | <i>LNK1</i>               | 2                 | 2  | 1  | 0  | 1                  | 0  | 2  | 1        | 5  | 1        | 1  | 2  | 4  | 1  | 1        | 3  | 2  | 1  | 2  | 1  | 1  | 1  | 1   | 1 |   |
| OG0022062                               |                                                         | <i>LNK1</i>               | 0                 | 0  | 0  | 1  | 1                  | 0  | 0  | 0        | 0  | 0        | 0  | 0  | 0  | 0  | 0        | 0  | 0  | 0  | 0  | 0  | 0  | 0  | 0   | 0 |   |
| OG0003157                               |                                                         | <i>LNK2</i>               | 1                 | 1  | 2  | 0  | 2                  | 1  | 1  | 2        | 2  | 1        | 1  | 1  | 3  | 5  | 1        | 1  | 0  | 4  | 1  | 7  | 1  | 1  | 0   | 1 |   |
| OG0011416                               |                                                         | <i>LNK3/4</i>             | 0                 | 1  | 0  | 0  | 1                  | 1  | 1  | 3        | 0  | 0        | 0  | 1  | 0  | 0  | 1        | 0  | 2  | 0  | 1  | 2  | 2  | 1  | 1   | 1 |   |
| OG0002371                               |                                                         | <i>TIC</i>                | 1                 | 1  | 1  | 0  | 1                  | 3  | 1  | 4        | 7  | 1        | 1  | 1  | 2  | 1  | 0        | 4  | 1  | 1  | 2  | 5  | 2  | 2  | 2   | 2 |   |

846  
847  
848  
849  
850  
851  
852  
853  
854  
855

**Supplementary Figure 5.6.4** Gene families containing photoreceptors and the main integration of light signalling toolkit genes. Species sequenced in this work are in bold. Full list of abbreviation of the species names used in the figure: CN *Cymodocea nodosa*; PO *Posidonia oceanica*; TT *Thalassia testudinum*; ZM *Zostera marina*; PA *Potamogeton acutifolius*; SP *Spirodela polyrhiza*; WA *Wolffia australiana*; AM *Avicennia marina*; RA *Rhizophora apiculata*; OS *Oryza sativa*; BD *Brachypodium distachyon*; AC *Ananas comosus*; EG *Elaeis guineensis*; AO *Asparagus officinalis*; BV *Beta vulgaris*; UG *Utricularia gibba*; SL *Solanum lycopersicum*; CC *Coffea canephora*; VV *Vitis vinifera*; PT *Populus trichocarpa*; AT *Arabidopsis thaliana*; TC *Theobroma cacao*; ATR *Amborella trichopoda*.

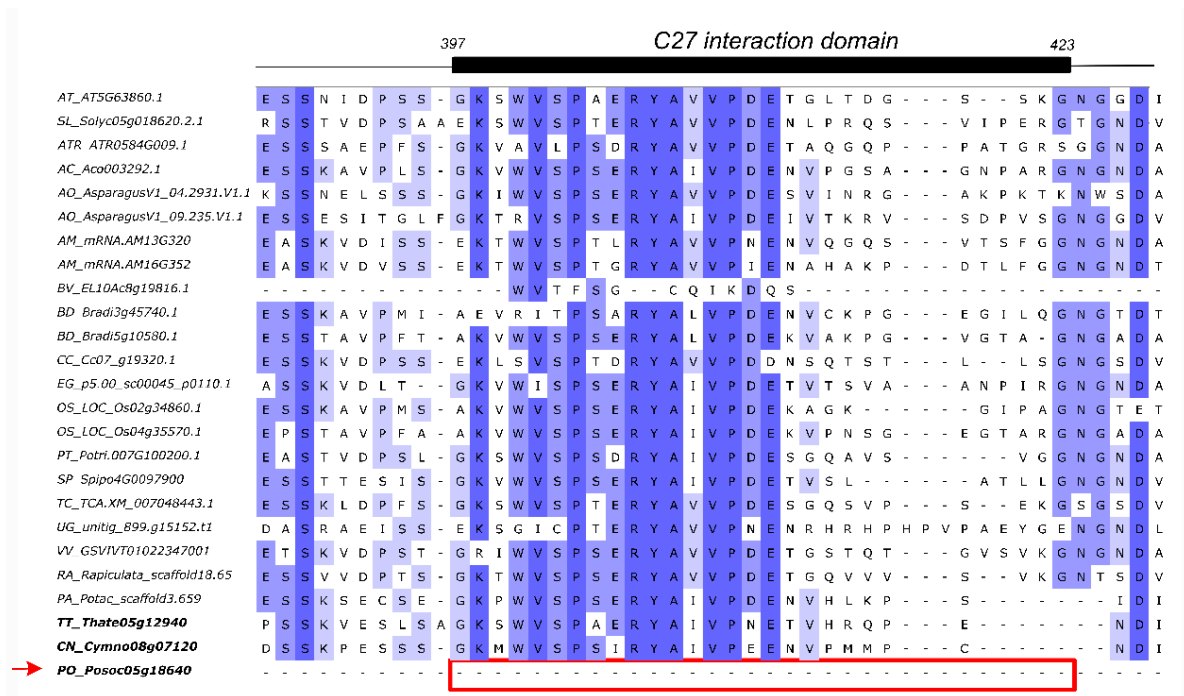

858 **Supplementary Figure 5.6.5 The N terminus alignment of UVB-Resistance 8.**

859 For the alignment, proteins sequences of the orthogroup OG0008432 were used. Sequences of seagrasses are  
 860 in bold. Full list of abbreviation of the species names used in the figure: AT *Arabidopsis thaliana*; SL *Solanum*  
 861 *lycopersicum*; ATR *Amborella trichopoda*; AC *Ananas comosus*; AO *Asparagus officinalis*; AM *Avicennia marina*;  
 862 BV *Beta vulgaris*; BD *Brachypodium distachyon*; CC *Coffea canephora*; CN *Cymodocea nodosa*; EG *Elaeis*  
 863 *guineensis*; OS *Oryza sativa*; PO *Posidonia oceanica*; PT *Populus trichocarpa*; PA *Potamogeton acutifolius*; RA  
 864 *Rhizophora apiculata*; SP *Spirodela polyrhiza*; TT *Thalassia testudinum*; TC *Theobroma cacao*; VV *Vitis vinifera*;  
 865 UG *Utricularia gibba*.

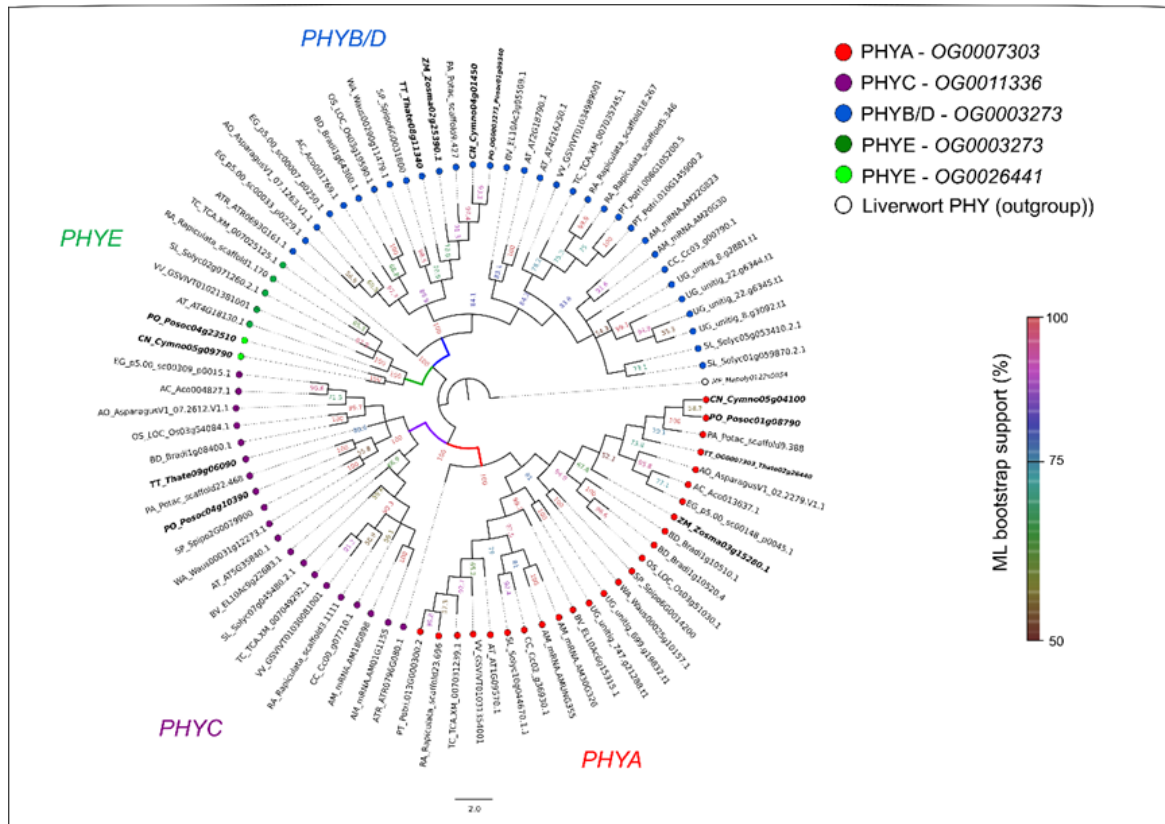

868

869 **Supplementary Figure 5.6.6** Phylogenetic tree of phytochromes obtained from the 84 proteins  
 870 sequences included in the orthogroups OG0007303, OG0003273, OG0011336 and OG0026441.

871 The 84 protein sequences of the four OGs (OG0007303, OG0003273, OG0011336 and OG0026441), which were  
 872 functionally annotated as putative phytochromes, were aligned using Muscle (MEGA5), with the phytochrome  
 873 sequence of the liverwort *Marchantia polymorpha* (MP\_Mapoly0122s0054 white dot; selected from PLAZA 5.0  
 874 (ORTHO05M001074 [https://bioinformatics.psb.ugent.be/plaza/versions/plaza\\_v5\\_monocots/](https://bioinformatics.psb.ugent.be/plaza/versions/plaza_v5_monocots/))  
 875 as an outgroup. The resulting multiple sequence alignment was trimmed with TRIMAL using the Automated 1 method. The ML  
 876 phylogenetic tree was generated using the JTT + I +G model with MEGA5. Bootstrap values (expressed as  
 877 percentages) were calculated over 1,000 replications. Only branches with a bootstrap support over 52% are  
 878 shown. Protein sequences of seagrasses are indicated in bold, while *Arabidopsis thaliana* orthologs of PHYA-E  
 879 were in italic (i.e., AT\_AT1G09570.1 phyA, AT\_AT5G35840.1 phyC, AT\_AT2G18790.1 phyB, AT\_AT4G16250.1  
 880 phyD, AT\_AT4G18130.1 phyE; according to TAIR classification). PHYA (red branch) and PHYC (violet branch) were  
 881 encoded by proteins sequences which were included respectively in the OG0007303 (red dots) and OG0011336  
 882 (violet dots). PHYB/D (blue branch) groups proteins sequences of OG0003273 (blue dots) while the PHYE form  
 883 (green branch) is represented by five proteins included in the OG0003273 (dark-green dots) plus two proteins  
 884 of Orthogroup OG0026441 (light-green dots) which is an OG exclusive of seagrasses, suggesting that the two  
 885 seagrasses *P. oceanica* and *C. nodosa* have retained a gene copy of PHYE even if this phytochrome form is often  
 886 missing in other monocotyledonous plants (Mathews 2006). Complete list of species names' abbreviations used  
 887 in the figure: AM *Avicennia marina*; AC *Ananas comosus*; AT *Arabidopsis thaliana*; AO *Asparagus officinalis*; ATR  
 888 *Amborella trichopoda*; BV *Beta vulgaris*; BD *Brachypodium distachyon*; CC *Coffea canephora*; CN *Cymodocea*  
 889 *nodosa*; EG *Elaeis guineensis*; OS *Oryza sativa*; PO *Posidonia oceanica*; PT *Populus trichocarpa*; PA *Potamogeton*  
 890 *acutifolius*; RA *Rhizophora apiculata*; SL *Solanum lycopersicum*; SP *Spirodela polyrhiza*; TT *Thalassia testudinum*;  
 891 TC *Theobroma cacao*; VV *Vitis vinifera*; UG *Utricularia gibba*.

892 5.7 NAC transcriptional factors

893 **Supplementary Note 5.7** NAC transcriptional factors

894 NAC proteins (NAM, ATAF1–2 and CUC2 transcription factors) are one of the largest family of transcriptional  
895 factors that are involved in different developmental processes as well as in the regulation of signaling pathways  
896 in response to abiotic stressors, especially salt stress (Puranik et al. 2012). A comparable number of sequences  
897 were found in seagrasses with respect to land plants, freshwater and mangroves species. However, specific  
898 orthogroups were found for seagrasses. One of them is annotated as JUNGBRUNNEN 1 (JUB1), and a specific  
899 functional analysis revealed that while *P. oceanica* retained JUNGBRUNNEN 1 (*JUB1*) genes with low expression  
900 values, *C. nodosa* expressed *JUB1* genes in leaves. *JUB1* is a central longevity regulator as well as a regulator of  
901 responses to abiotic stressors enhancing salt stress tolerance (Wu et al., 2012) regulating plant responses to  
902 environmental factors.

903 In addition, other sequences annotated as *JUB1* were found across all species belonging to different orthogroups.  
904 The OG0000816 was the most representative orthogroup counting a total of 67 sequences across all species  
905 (land plants, freshwater and mangroves species). Here too, in *P. oceanica* only Posoc08g09120 and  
906 Posoc08g09110 were weakly expressed in leaves. Contrarily, sequences found for the other seagrasses  
907 (*Cymno02g16010*, *Cymno02g16050*, *Zosma03g24220.1*) showed higher expression values especially in leaves.  
908 In *T. testudinum*, one single gene copy was found (*Thate04g03560*) specifically expressed in root and leaf. Thus,  
909 a phylogenetic tree was built including these sequences to visualize relationships of the *JUB1* sequences  
910 between seagrasses (Supplementary Figure 5.7). Sequences of *P. oceanica* (*Posoc08g09120* and *Posoc08g09110*)  
911 and *C. nodosa* (*Cymno02g16010*, *Cymno02g16050*) belonging to the same orthogroup (OG0000816) formed a  
912 single clade, apart from *T. testudinum* (*Thate04g03560*), *Z. marina* (*Zosma03g24220.1*) and *Posoc10g09490*.  
913 Considering that *P. oceanica* and *C. nodosa* are phylogenetically closely related, the different expression levels

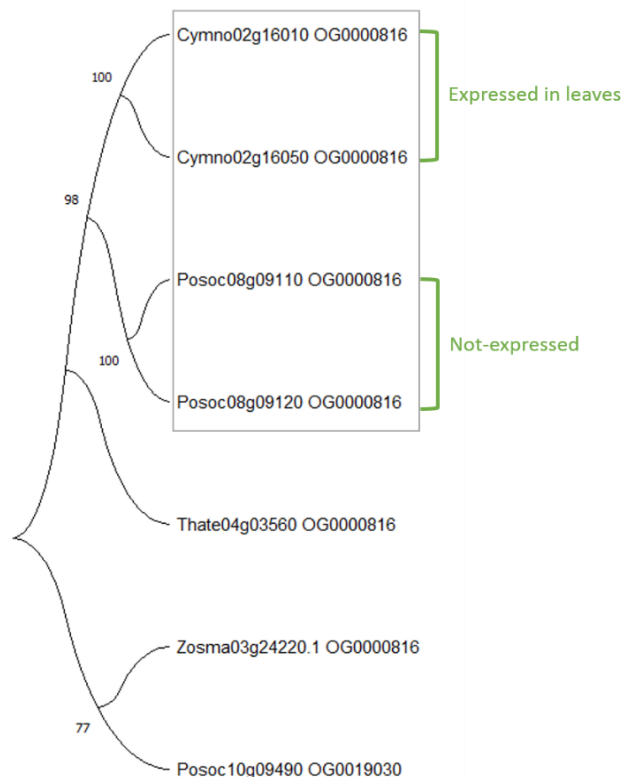

**Supplementary Figure 5.7** Evolutionary analysis by Maximum Likelihood method of *JUB1* in seagrasses.

914 observed for JUB1 sequences could suggests a functional re-organization that could be related to the different  
915 ecological requirements of these species, modulating stress tolerance in seagrasses, including response to  
916 salinity. *P. oceanica*, in fact, colonizes open coastal habitats with a very narrow range of salinity, contrary to *C.*  
917 *nodosa* which can also be present in estuarine dynamic environmental conditions and highly variable salinities.

## 918 5.8 Nitrogen metabolism

### 919 **Supplementary Note 5.8 Nitrogen metabolism**

920 Seagrass meadows act as an important nitrogen (N) filter in the coastal environments. In this context, seagrasses  
921 assimilate large amounts of N, and exude oxygen and labile carbon into sediments, which stimulate other  
922 processes in the nitrogen metabolism pathway, including nitrification-denitrification process that  
923 counterbalances the net N loads through microbial transformation (Zarnoch et al. 2017; Aoki et al. 2020). The  
924 key genes linked to nitrogen uptake/transport and assimilation were retained in all of the plants examined  
925 (Extended table 10). This corresponds to at least 66 and 25 orthogroups which function in uptake/transport and  
926 assimilation, respectively. Their existence is essential because an efficient N metabolism process is required to  
927 ensure normal growth and development in plants, regardless of their diversity, habitat or nature. Moreover,  
928 seagrasses may have acquired a more effective nitrogen metabolism in N-deficient marine environments  
929 through symbiotic N<sub>2</sub>-fixing bacteria, that could have facilitated the migration of flowering plants back to the  
930 sea some 100 million years ago (Mohr et al. 2021).

931 As compared to non-seagrass genomes, the nitrate transporter (*NRT*) gene families of seagrasses were  
932 contracted (40.71%), indicating that seagrasses may have evolved alternative mechanisms to utilize nitrogen  
933 sources more effectively (Extended table 10). Other than nitrate, seagrasses rely on ammonium as a primary  
934 source of nitrogen (Touchette and Burkholder 2001; Xu et al. 2020), particularly when exposed to anoxic  
935 conditions in marine sediment where nitrate is scarce due to disrupted ammonium-to-nitrate oxidation. In this  
936 case, ammonium is metabolized directly via GOGAT pathway, which catalyzes the formation of glutamine from  
937 glutamate and ammonium, instead of converting nitrate to ammonium prior to glutamine formation (Wang et  
938 al. 2021).

939 Nitrate reductase (*NR*) was expressed in all parts of seagrasses (flower, root, vegetative, rhizome), with *NR*  
940 robustly expressed in the root of *Zostera marina* and the leaves of *Cymodocea nodosa* and *Thalassia testudinum*.  
941 *NR* activity is widely influenced by light (Touchette and Burkholder 2001) and given that *NR* activity is highest  
942 during photosynthetic periods and lowest in the dark, nitrite reduction occurs more frequently in leaf tissues  
943 than in root tissues in most seagrasses, suggesting the importance of light on *NR* response (Manassa et al. 2017;  
944 Wang et al. 2021; Jiménez-Ramos et al. 2022). *Zostera marina* is unique from the other seagrasses as its *NR*  
945 activity can be maintained in the dark, provided that the environment is nitrate-enriched and tissue  
946 carbohydrate levels are high (Touchette and Burkholder 2001). The intensity and duration of *NR* activity is  
947 directly parallel with the soluble carbohydrate supplies (Touchette and Burkholder 2007). On the other hand,  
948 seagrass leaves such as those in *T. testudinum* tend to have higher efficiency of nitrogen assimilation compared  
949 to root, given that the NH<sub>4</sub><sup>+</sup> in the water column is relatively lower than the sediments where seagrass inhabit  
950 (Lee and Dunton 1999; Cornelisen and Thomas 2004).

## 951 5.9 Flower and pollen development

### 952 **Supplementary Note 5.9 Flower and pollen development**

953 MADS-box genes encode transcription factors that play a crucial role in controlling various developmental  
954 programs including the development of floral organs. We predicted considerable re-arrangements in seagrasses  
955 as petals and sepals are completely reduced. Type II MADS-box genes have been extensively studied for their  
956 role in specifying floral organ development.

957 To identify MADS-box genes in the genomes of *Z. marina*, *C. nodosa*, *P. oceanica*, *T. testudinum*, and *P. acutifolius*,  
 958 we employed a hidden Markov model (HMM). The HMM profile for the SRF-TF domain (PF00319) was obtained  
 959 from the Pfam database (Mistry et al. 2021). This profile was used to search against the local protein database  
 960 using the HMMER software, with an E-value threshold of  $< 1e-5$ . Using the same method described above,  
 961 MADS-box genes of *A. thaliana* and *O. sativa* were obtained. Subsequently, all candidate proteins from the seven  
 962 species mentioned above were aligned using MAFFT, resulting in a concatenated dataset, which was then used  
 963 for phylogenetic analysis to further identify the type II MADS-box genes. We identified 22, 26, 29, 24, and 29  
 964 Type II MADS-box genes in *Z. marina*, *P. oceanica*, *C. nodosa*, *T. testudinum*, and *Potamogeton*, respectively  
 965 (Supplementary Table 5.9 and Figure 4a). Among these, several are homologues of genes defining the well-  
 966 known ABCE model (Lohmann and Weigel 2002; Krizek and Fletcher 2005): AP1 and AGL6 (A function for sepals  
 967 and petals), PI and AP3 (B function for petals and stamen), as well as OsMADS32 (B function in rice), AG (C  
 968 function for stamen and carpel), and SEP (E function for interacting with ABC function proteins).

969 We also analyzed the expression profile of these genes in various tissues. For the flower tissue of *Posidonia*  
 970 *oceanica*, RNA-seq data was obtained from the NCBI Short Read Archive under BioProject ID PRJNA375717  
 971 (Entrambasaguas et al. 2017). Subsequently, the data was aligned to the *P. oceanica* assembly.

972 **Supplementary Table 5.9. The MADS-box genes in seagrasses and *P. acutifolius***

|                         |          | <i>Z. marina</i> | <i>P. oceanica</i> | <i>C. nodosa</i> | <i>T. testudinum</i> | <i>P. acutifolius</i> |
|-------------------------|----------|------------------|--------------------|------------------|----------------------|-----------------------|
| MADS-box genes in total |          | 48               | 46                 | 44               | 34                   | 38                    |
| <b>Type II</b>          |          | 22               | 26                 | 29               | 24                   | 29                    |
| A function              | AP1      | 4                | 2                  | 4                | 2                    | 3                     |
|                         | AGL6     | 1                | 1                  | 1                | 1                    | 1                     |
| B function              | PI       | 1                | 1                  | 1                | 6                    | 1                     |
|                         | AP3      | 1                | 1                  | 1                | 1                    | 1                     |
|                         | OsMADS32 | 1                | 1                  | 0                | 1                    | 1                     |
| C function              | AG       | 4                | 3                  | 6                | 1                    | 3                     |
| E function              | SEP      | 2                | 2                  | 2                | 2                    | 2                     |

973

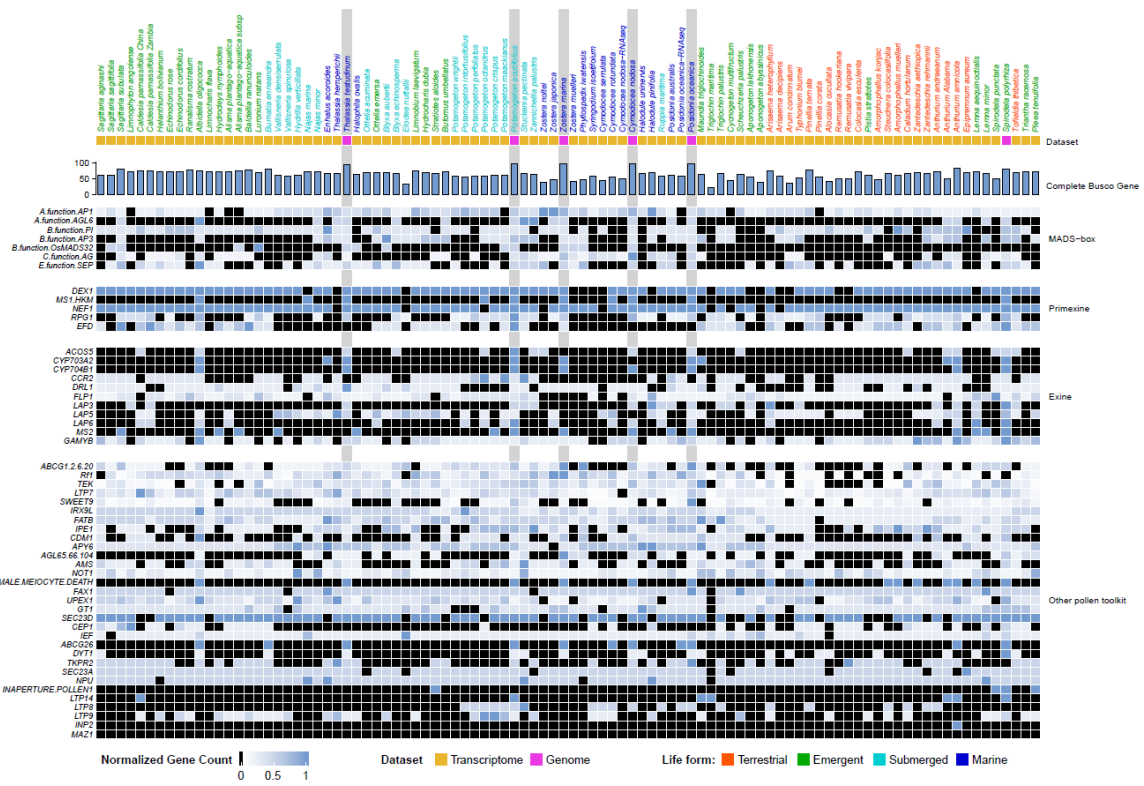

974

975 **Supplementary Figure 5.9** Normalized gene copy numbers for flower and pollen development genes  
 976 and gene families for 96 species, including 6 genomic data and 90 transcriptomic data. The light grey  
 977 background denotes our genomic data of four seagrasses and one freshwater relative, *Potamogeton acutifolius*.  
 978 Others are the transcriptomic data from Chen et al. (2022) and *Spirodela polyrhiza* genomic data. Normalization  
 979 for each gene family was obtained by dividing the number of genes in that gene family for a particular species  
 980 by the largest gene copy number within that family (considering all species). Genes in black are absent.

981



## References

- 982  
983  
984 Altschul SF, Gish W, Miller W, Myers EW, Lipman DJ. 1990. Basic local alignment search tool. *J Mol Biol* **215**: 403-  
985 410.
- 986 An D, Zhou Y, Li C, Xiao Q, Wang T, Zhang Y, Wu Y, Li Y, Chao DY, Messing J et al. 2019. Plant evolution and  
987 environmental adaptation unveiled by long-read whole-genome sequencing of *Spirodela*. *Proc Natl*  
988 *Acad Sci U S A* **116**: 18893-18899.
- 989 Aoki LR, McGlathery KJ, Oreska MPJ. 2020. Seagrass restoration reestablishes the coastal nitrogen filter through  
990 enhanced burial. *Limnology and Oceanography* **65**: 1-12.
- 991 Berry EW. 1914. The Upper Cretaceous and Eocene floras of South Carolina and Georgia. doi:10.3133/pp84.
- 992 Campbell JE, Fourqurean JW. 2013. Mechanisms of bicarbonate use influence the photosynthetic carbon dioxide  
993 sensitivity of tropical seagrasses. *Limnology and Oceanography* **58**: 839-848.
- 994 Capella-Gutiérrez S, Silla-Martínez JM, Gabaldón T. 2009. trimAl: a tool for automated alignment trimming in  
995 large-scale phylogenetic analyses. *Bioinformatics* **25**: 1972-1973.
- 996 Capó-Bauçà S, Iñiguez C, Aguiló-Nicolau P, Galmés J. 2022. Correlative adaptation between Rubisco and CO<sub>2</sub>-  
997 concentrating mechanisms in seagrasses. *Nature Plants* **8**: 706-716.
- 998 Cervela-Cardona L, Yoshida T, Zhang Y, Okada M, Fernie A, Mas P. 2021. Circadian Control of Metabolism by the  
999 Clock Component TOC1. *Frontiers in Plant Science* **12**.
- 1000 Chen C, Chen H, Zhang Y, Thomas HR, Frank MH, He Y, Xia R. 2020. TBtools: An Integrative Toolkit Developed for  
1001 Interactive Analyses of Big Biological Data. *Mol Plant* **13**: 1194-1202.
- 1002 Chen L-Y, Lu B, Morales-Briones DF, Moody ML, Liu F, Hu G-W, Huang C-H, Chen J-M, Wang Q-F. 2022.  
1003 Phylogenomic Analyses of Alismatales Shed Light into Adaptations to Aquatic Environments. *Molecular*  
1004 *Biology and Evolution* **39**.
- 1005 Cornelisen CD, Thomas FIM. 2004. Ammonium and nitrate uptake by leaves of the seagrass *Thalassia testudinum*:  
1006 impact of hydrodynamic regime and epiphyte cover on uptake rates. *Journal of Marine Systems* **49**:  
1007 177-194.
- 1008 Crepet W, Nixon K. 1998. Fossil Clusiaceae from the late Cretaceous (Turonian) of New Jersey and implications  
1009 regarding the history of bee pollination. *Am J Bot* **85**: 1122.
- 1010 Dierckxsens N, Mardulyn P, Smits G. 2017. NOVOPlasty: de novo assembly of organelle genomes from whole  
1011 genome data. *Nucleic Acids Res* **45**: e18.
- 1012 DiMario RJ, Clayton H, Mukherjee A, Ludwig M, Moroney JV. 2017. Plant Carbonic Anhydrases: Structures,  
1013 Locations, Evolution, and Physiological Roles. *Molecular Plant* **10**: 30-46.
- 1014 Ding Y, Liu N, Virilouvet L, Riethoven J-J, Fromm M, Avramova Z. 2013. Four distinct types of dehydration stress  
1015 memory genes in *Arabidopsis thaliana*. *BMC Plant Biology* **13**: 229.
- 1016 Dongen SV. 2008. Graph Clustering Via a Discrete Uncoupling Process. *SIAM Journal on Matrix Analysis and*  
1017 *Applications* **30**: 121-141.
- 1018 Doyle JA, Endress PK, Upchurch GR. 2008. Early Cretaceous monocots: a phylogenetic evaluation. *Sborník*  
1019 *Národního muzea v Praze Acta Musei nationalis Pragae* **64**: 61-87.
- 1020 Edgar RC. 2004. MUSCLE: multiple sequence alignment with high accuracy and high throughput. *Nucleic Acids*  
1021 *Res* **32**: 1792-1797.
- 1022 Emms DM, Kelly S. 2015. OrthoFinder: solving fundamental biases in whole genome comparisons dramatically  
1023 improves orthogroup inference accuracy. *Genome Biology* **16**: 157.
- 1024 Emms DM, Kelly S. 2019. OrthoFinder: phylogenetic orthology inference for comparative genomics. *Genome Biol*  
1025 **20**: 238.
- 1026 Entrambasaguas L, Jahnke M, Biffali E, Borra M, Sanges R, Marin-Guirao L, Procaccini G. 2017. Tissue-specific  
1027 transcriptomic profiling provides new insights into the reproductive ecology and biology of the iconic  
1028 seagrass species *Posidonia oceanica*. *Mar Genomics* **35**: 51-61.
- 1029 Gandolfo M, Nixon K, Crepet W. 1998. A new fossil flower from the Turonian of New Jersey: *Dressiantha*  
1030 *bicarpellata* gen. et sp. nov. (Capparales). *Am J Bot* **85**: 964.
- 1031 Guo L, Winzer T, Yang X, Li Y, Ning Z, He Z, Teodor R, Lu Y, Bowser TA, Graham IA et al. 2018. The opium poppy  
1032 genome and morphinan production. *Science* **362**: 343-347.
- 1033 Guo M, Liu JH, Ma X, Luo DX, Gong ZH, Lu MH. 2016. The Plant Heat Stress Transcription Factors (HSFs): Structure,  
1034 Regulation, and Function in Response to Abiotic Stresses. *Front Plant Sci* **7**: 114.
- 1035 Han X, Chang X, Zhang Z, Chen H, He H, Zhong B, Deng XW. 2019. Origin and Evolution of Core Components  
1036 Responsible for Monitoring Light Environment Changes during Plant Terrestrialization. *Molecular Plant*  
1037 **12**: 847-862.

1038 Harmer SL. 2009. The circadian system in higher plants. *Annual review of plant biology* **60**: 357-377.

1039 Heerklotz D, Döring P, Bonzelius F, Winkelhaus S, Nover L. 2001. The balance of nuclear import and export  
1040 determines the intracellular distribution and function of tomato heat stress transcription factor HsfA2.  
1041 *Mol Cell Biol* **21**: 1759-1768.

1042 Huelsenbeck JP, Ronquist F. 2001. MRBAYES: Bayesian inference of phylogenetic trees. *Bioinformatics* **17**: 754-  
1043 755.

1044 Ikeda M, Mitsuda N, Ohme-Takagi M. 2011. Arabidopsis HsfB1 and HsfB2b act as repressors of the expression  
1045 of heat-inducible Hsfs but positively regulate the acquired thermotolerance. *Plant Physiol* **157**: 1243-  
1046 1254.

1047 Iles WJ, Smith SY, Gandolfo MA, Graham SW. 2015. Monocot fossils suitable for molecular dating analyses.  
1048 *Botanical Journal of the Linnean Society* **178**: 346-374.

1049 International Peach Genome I, Verde I, Abbott AG, Scalabrin S, Jung S, Shu S, Marroni F, Zhebentyayeva T, Dettori  
1050 MT, Grimwood J et al. 2013. The high-quality draft genome of peach (*Prunus persica*) identifies unique  
1051 patterns of genetic diversity, domestication and genome evolution. *Nat Genet* **45**: 487-494.

1052 Jacob F, Vernaldi S, Maekawa T. 2013. Evolution and Conservation of Plant NLR Functions. *Front Immunol* **4**: 297.

1053 Janssen T, Bremer K. 2004. The age of major monocot groups inferred from 800+ rbcL sequences. *Botanical  
1054 Journal of the Linnean Society* **146**: 385-398.

1055 Jiménez-Ramos R, Villazán B, Egea LG, Cantero R, Pérez-Lloréns JL, Vergara JJ, Brun FG. 2022. Differential  
1056 ecophysiological responses to inorganic nitrogen sources (ammonium versus nitrate) and light levels in  
1057 the seagrass *Zostera noltei*. *Marine Ecology Progress Series* **702**: 57-70.

1058 Jing Y, Lin R. 2020. Transcriptional Regulatory Network of the Light Signaling Pathways. *The New phytologist*.

1059 Koch M, Bowes G, Ross C, Zhang X-H. 2013. Climate change and ocean acidification effects on seagrasses and  
1060 marine macroalgae. *Global Change Biology* **19**: 103-132.

1061 Kozik A, Rowan BA, Lavelle D, Berke L, Schranz ME, Michelmore RW, Christensen AC. 2019. The alternative reality  
1062 of plant mitochondrial DNA: One ring does not rule them all. *PLoS Genet* **15**: e1008373.

1063 Krizek BA, Fletcher JC. 2005. Molecular mechanisms of flower development: an armchair guide. *Nature Reviews  
1064 Genetics* **6**: 688-698.

1065 Krzywinski M, Schein J, Birol I, Connors J, Gascoyne R, Horsman D, Jones SJ, Marra MA. 2009. Circos: an  
1066 information aesthetic for comparative genomics. *Genome Res* **19**: 1639-1645.

1067 Larkum AWD, Davey PA, Kuo J, Ralph PJ, Raven JA. 2017. Carbon-concentrating mechanisms in seagrasses.  
1068 *Journal of Experimental Botany* **68**: 3773-3784.

1069 Larkum AWD, Pernice M, Schliep M, Davey P, Szabo M, Raven JA, Lichtenberg M, Brodersen KE, Ralph PJ. 2018.  
1070 Photosynthesis and Metabolism of Seagrasses. In *Seagrasses of Australia: Structure, Ecology and  
1071 Conservation*, doi:10.1007/978-3-319-71354-0\_11 (ed. AWD Larkum, et al.), pp. 315-342. Springer  
1072 International Publishing, Cham.

1073 Laslett D, Canback B. 2004. ARAGORN, a program to detect tRNA genes and tmRNA genes in nucleotide  
1074 sequences. *Nucleic Acids Res* **32**: 11-16.

1075 Lee BH, Henderson DA, Zhu JK. 2005. The Arabidopsis cold-responsive transcriptome and its regulation by ICE1.  
1076 *Plant Cell* **17**: 3155-3175.

1077 Lee K-S, Dunton KH. 1999. Inorganic nitrogen acquisition in the seagrass *Thalassia testudinum*: Development of  
1078 a whole-plant nitrogen budget. *Limnology and Oceanography* **44**: 1204-1215.

1079 Legnaioli T, Cuevas J, Mas P. 2009. TOC1 functions as a molecular switch connecting the circadian clock with  
1080 plant responses to drought. *The EMBO Journal* **28**: 3745-3757.

1081 Les DH, Cleland MA, Waycott M. 1997. Phylogenetic Studies in Alismatidae, II: Evolution of Marine Angiosperms  
1082 (Seagrasses) and Hydrophily. *Systematic Botany* **22**: 443.

1083 Li F-W, Melkonian M, Rothfels CJ, Villarreal JC, Stevenson DW, Graham SW, Wong GK-S, Pryer KM, Mathews S.  
1084 2015. Phytochrome diversity in green plants and the origin of canonical plant phytochromes. *Nature  
1085 Communications* **6**: 7852.

1086 Liu Y, Zeng Z, Zhang YM, Li Q, Jiang XM, Jiang Z, Tang JH, Chen D, Wang Q, Chen JQ et al. 2021. An angiosperm  
1087 NLR Atlas reveals that NLR gene reduction is associated with ecological specialization and signal  
1088 transduction component deletion. *Mol Plant* **14**: 2015-2031.

1089 Lohmann JU, Weigel D. 2002. Building beauty: the genetic control of floral patterning. *Dev Cell* **2**: 135-142.

1090 Loytynoja A, Goldman N. 2005. An algorithm for progressive multiple alignment of sequences with insertions.  
1091 *Proc Natl Acad Sci U S A* **102**: 10557-10562.

1092 Ma X, Fan J, Wu Y, Zhao S, Zheng X, Sun C, Tan L. 2020. Whole-genome de novo assemblies reveal extensive  
1093 structural variations and dynamic organelle-to-nucleus DNA transfers in African and Asian rice. *Plant J  
1094* **104**: 596-612.

1095 Ma X, Olsen JL, Reusch TBH, Procaccini G, Kudrna D, Williams M, Grimwood J, Rajasekar S, Jenkins J, Schmutz J  
1096 et al. 2021a. Improved chromosome-level genome assembly and annotation of the seagrass, *Zostera*  
1097 *marina* (eelgrass). *F1000Research* **10**.

1098 Ma X, Olsen JL, Reusch TBH, Procaccini G, Kudrna D, Williams M, Grimwood J, Rajasekar S, Jenkins J, Schmutz J  
1099 et al. 2021b. Improved chromosome-level genome assembly and annotation of the seagrass, *Zostera*  
1100 *marina* (eelgrass). *F1000Res* **10**: 289.

1101 Manassa RP, Smith TM, Beardall J, Keough MJ, Cook PLM. 2017. Capacity of a temperate intertidal seagrass  
1102 species to tolerate changing environmental conditions: Significance of light and tidal exposure.  
1103 *Ecological Indicators* **81**: 578-586.

1104 Marina K, Thorsten BHR, Tal D. 2023. Worldwide population genomics reveal long-term stability of the  
1105 mitochondrial chromosome composition in a keystone marine plant. *bioRxiv*  
1106 doi:10.1101/2023.04.21.537793: 2023.2004.2021.537793.

1107 Mathews S. 2006. Phytochrome-mediated development in land plants: red light sensing evolves to meet the  
1108 challenges of changing light environments. *Molecular ecology* **15**: 3483-3503.

1109 Mathews S. 2010. Evolutionary Studies Illuminate the Structural-Functional Model of Plant Phytochromes. *The*  
1110 *Plant Cell* **22**: 4-16.

1111 McClung CR. 2019. The plant circadian oscillator. Vol 8.

1112 Michael TP, Ernst E, Hartwick N, Chu P, Bryant D, Gilbert S, Ortleb S, Baggs EL, Sree KS, Appenroth KJ et al. 2021.  
1113 Genome and time-of-day transcriptome of *Wolffia australiana* link morphological minimization with  
1114 gene loss and less growth control. *Genome Research* **31**: 225-238.

1115 Michalovova M, Vyskot B, Kejnovsky E. 2013. Analysis of plastid and mitochondrial DNA insertions in the nucleus  
1116 (NUPTs and NUMTs) of six plant species: size, relative age and chromosomal localization. *Heredity* **111**:  
1117 314-320.

1118 Ming R, VanBuren R, Wai CM, Tang H, Schatz MC, Bowers JE, Lyons E, Wang ML, Chen J, Biggers E et al. 2015.  
1119 The pineapple genome and the evolution of CAM photosynthesis. *Nat Genet* **47**: 1435-1442.

1120 Minh BQ, Schmidt HA, Chernomor O, Schrempf D, Woodhams MD, von Haeseler A, Lanfear R. 2020. IQ-TREE 2:  
1121 New Models and Efficient Methods for Phylogenetic Inference in the Genomic Era. *Molecular Biology*  
1122 *and Evolution* **37**: 1530-1534.

1123 Mishra SK, Tripp J, Winkelhaus S, Tschiersch B, Theres K, Nover L, Scharf KD. 2002. In the complex family of heat  
1124 stress transcription factors, HsfA1 has a unique role as master regulator of thermotolerance in tomato.  
1125 *Genes Dev* **16**: 1555-1567.

1126 Mistry J, Chuguransky S, Williams L, Qureshi M, Salazar GA, Sonnhammer ELL, Tosatto SCE, Paladin L, Raj S,  
1127 Richardson LJ et al. 2021. Pfam: The protein families database in 2021. *Nucleic Acids Res* **49**: D412-d419.

1128 Mittal D, Madhyastha DA, Grover A. 2012. Gene expression analysis in response to low and high temperature  
1129 and oxidative stresses in rice: combination of stresses evokes different transcriptional changes as  
1130 against stresses applied individually. *Plant Sci* **197**: 102-113.

1131 Mohr W, Lehnen N, Ahmerkamp S, Marchant HK, Graf JS, Tschitschko B, Yilmaz P, Littmann S, Gruber-Vodicka H,  
1132 Leisch N et al. 2021. Terrestrial-type nitrogen-fixing symbiosis between seagrass and a marine  
1133 bacterium. *Nature* **600**: 105-109.

1134 Morley SA, Nielsen BL. 2017. Plant mitochondrial DNA. *Front Biosci (Landmark Ed)* **22**: 1023-1032.

1135 Murat F, Armero A, Pont C, Klopp C, Salse J. 2017. Reconstructing the genome of the most recent common  
1136 ancestor of flowering plants. *Nature Genetics* **49**: 490-496.

1137 Nauheimer L, Metzler D, Renner SS. 2012. Global history of the ancient monocot family Araceae inferred with  
1138 models accounting for past continental positions and previous ranges based on fossils. *New Phytologist*  
1139 **195**: 938-950.

1140 Olsen JL, Rouze P, Verhelst B, Lin YC, Bayer T, Collen J, Dattolo E, De Paoli E, Dittami S, Maumus F et al. 2016.  
1141 The genome of the seagrass *Zostera marina* reveals angiosperm adaptation to the sea. *Nature* **530**: 331-  
1142 335.

1143 Personat JM, Tejedor-Cano J, Prieto-Dapena P, Almoguera C, Jordano J. 2014. Co-overexpression of two Heat  
1144 Shock Factors results in enhanced seed longevity and in synergistic effects on seedling tolerance to  
1145 severe dehydration and oxidative stress. *BMC Plant Biol* **14**: 56.

1146 Petersen G, Cuenca A, Zervas A, Ross GT, Graham SW, Barrett CF, Davis JI, Seberg O. 2017. Mitochondrial genome  
1147 evolution in Alismatales: Size reduction and extensive loss of ribosomal protein genes. *PLoS One* **12**:  
1148 e0177606.

1149 Pokhilko A, Mas P, Millar AJ. 2013. Modelling the widespread effects of TOC1 signalling on the plant circadian  
1150 clock and its outputs. *BMC Systems Biology* **7**: 23-23.

1151 Price MN, Dehal PS, Arkin AP. 2010. FastTree 2--approximately maximum-likelihood trees for large alignments.  
1152 *PLoS One* **5**: e9490.

1153 Puranik S, Sahu PP, Srivastava PS, Prasad M. 2012. NAC proteins: regulation and role in stress tolerance. *Trends*  
1154 *in Plant Science* **17**: 369-381.

1155 Rao SK, Magnin NIC, Reiskind JB, Bowes G. 2002. Photosynthetic and Other Phosphoenolpyruvate Carboxylase  
1156 Isoforms in the Single-Cell, Facultative C4System of Hydrilla verticillata *Plant Physiology* **130**: 876-886.

1157 Rockwell NC, Lagarias JC. 2020. Phytochrome evolution in 3D: deletion, duplication, and diversification. *New*  
1158 *Phytologist* **225**: 2283-2300.

1159 Ross TG, Barrett CF, Soto Gomez M, Lam VKY, Henriquez CL, Les DH, Davis JI, Cuenca A, Petersen G, Seberg O et  
1160 al. 2016. Plastid phylogenomics and molecular evolution of Alismatales. *Cladistics* **32**: 160-178.

1161 Rozewicki J, Li S, Amada KM, Standley DM, Katoh K. 2019. MAFFT-DASH: integrated protein sequence and  
1162 structural alignment. *Nucleic Acids Research* **47**: W5-W10.

1163 Rubio L, García D, García-Sánchez MJ, Niell FX, Felle HH, Fernández JA. 2017. Direct uptake of HCO<sub>3</sub><sup>-</sup> in the  
1164 marine angiosperm *Posidonia oceanica* (L.) Delile driven by a plasma membrane H<sup>+</sup> economy. *Plant,*  
1165 *Cell & Environment* **40**: 2820-2830.

1166 Sakuma Y, Maruyama K, Qin F, Osakabe Y, Shinozaki K, Yamaguchi-Shinozaki K. 2006. Dual function of an  
1167 Arabidopsis transcription factor DREB2A in water-stress-responsive and heat-stress-responsive gene  
1168 expression. *Proc Natl Acad Sci U S A* **103**: 18822-18827.

1169 Scharf KD, Berberich T, Ebersberger I, Nover L. 2012. The plant heat stress transcription factor (Hsf) family:  
1170 structure, function and evolution. *Biochim Biophys Acta* **1819**: 104-119.

1171 Sensalari C, Maere S, Lohaus R. 2021. ksrates: positioning whole-genome duplications relative to speciation  
1172 events in KS distributions. *Bioinformatics* doi:10.1093/bioinformatics/btab602.

1173 Simillion C, Janssens K, Sterck L, Van de Peer Y. 2008. i-ADHoRe 2.0: an improved tool to detect degenerated  
1174 genomic homology using genomic profiles. *Bioinformatics* **24**: 127-128.

1175 Smith DR, Crosby K, Lee RW. 2011. Correlation between nuclear plastid DNA abundance and plastid number  
1176 supports the limited transfer window hypothesis. *Genome Biol Evol* **3**: 365-371.

1177 Smith H. 2000. Phytochromes and light signal perception by plants-an emerging synthesis. *Nature* **407**: 585-591.

1178 Smith SA, Beaulieu JM, Donoghue MJ. 2010. An uncorrelated relaxed-clock analysis suggests an earlier origin for  
1179 flowering plants. *Proceedings of the National Academy of Sciences* **107**: 5897-5902.

1180 Steuernagel B, Witek K, Krattinger SG, Ramirez-Gonzalez RH, Schoonbeek HJ, Yu G, Baggs E, Witek AI, Yadav I,  
1181 Krasileva KV et al. 2020. The NLR-Annotator Tool Enables Annotation of the Intracellular Immune  
1182 Receptor Repertoire. *Plant Physiol* **183**: 468-482.

1183 Szöllősi GJ, Rosikiewicz W, Boussau B, Tannier E, Daubin V. 2013. Efficient exploration of the space of reconciled  
1184 gene trees. *Syst Biol* **62**: 901-912.

1185 Tang H, Bowers JE, Wang X, Ming R, Alam M, Paterson AH. 2008. Synteny and collinearity in plant genomes.  
1186 *Science* **320**: 486-488.

1187 Tang H, Bowers JE, Wang X, Paterson AH. 2010. Angiosperm genome comparisons reveal early polyploidy in the  
1188 monocot lineage. *Proc Natl Acad Sci U S A* **107**: 472-477.

1189 Tillich M, Lehwark P, Pellizzer T, Ulbricht-Jones ES, Fischer A, Bock R, Greiner S. 2017. GeSeq – versatile and  
1190 accurate annotation of organelle genomes. *Nucleic Acids Research* **45**: W6-W11.

1191 Toda N, Rustenholz C, Baud A, Le Paslier MC, Amselem J, Merdinoglu D, Faivre-Rampant P. 2020.  
1192 NLGenomeSweeper: A Tool for Genome-Wide NBS-LRR Resistance Gene Identification. *Genes (Basel)*  
1193 **11**.

1194 Touchette BW, Burkholder J. 2001. Nitrate reductase activity in a submersed marine angiosperm: Controlling  
1195 influences of environmental and physiological factors. *Plant Physiology and Biochemistry* **39**: 583-593.

1196 Touchette BW, Burkholder JM. 2007. Carbon and nitrogen metabolism in the seagrass, *Zostera marina* L.:  
1197 Environmental control of enzymes involved in carbon allocation and nitrogen assimilation. *Journal of*  
1198 *Experimental Marine Biology and Ecology* **350**: 216-233.

1199 Tuskan GA Difazio S Jansson S Bohlmann J Grigoriev I Hellsten U Putnam N Ralph S Rombauts S Salamov A et al.  
1200 2006. The genome of black cottonwood, *Populus trichocarpa* (Torr. & Gray). *Science* **313**: 1596-1604.

1201 Vanneste K, Baele G, Maere S, Van de Peer Y. 2014. Analysis of 41 plant genomes supports a wave of successful  
1202 genome duplications in association with the Cretaceous-Paleogene boundary. *Genome Res* **24**: 1334-  
1203 1347.

1204 von Koskull-Döring P, Scharf KD, Nover L. 2007. The diversity of plant heat stress transcription factors. *Trends*  
1205 *Plant Sci* **12**: 452-457.

1206 Walker BJ, Abeel T, Shea T, Priest M, Abouelliel A, Sakthikumar S, Cuomo CA, Zeng Q, Wortman J, Young SK et  
1207 al. 2014. Pilon: an integrated tool for comprehensive microbial variant detection and genome assembly  
1208 improvement. *PLoS One* **9**: e112963.

1209 Wang H, Tang X, Chen J, Shang S, Zhu M, Liang S, Zang Y. 2021. Comparative studies on the response of *Zostera*  
1210 *marina* leaves and roots to ammonium stress and effects on nitrogen metabolism. *Aquatic Toxicology*  
1211 **240**.

1212 Wang J, Du Z, Huo X, Zhou J, Chen Y, Zhang J, Pan A, Wang X, Wang F, Zhang J. 2020. Genome-wide analysis of  
1213 PRR gene family uncovers their roles in circadian rhythmic changes and response to drought stress in  
1214 *Gossypium hirsutum* L. *PeerJ* **8**: e9936-e9936.

1215 Wang W, Haberer G, Gundlach H, Glasser C, Nussbaumer T, Luo MC, Lomsadze A, Borodovsky M, Kerstetter RA,  
1216 Shanklin J et al. 2014. The *Spirodela polyrhiza* genome reveals insights into its neotenenous reduction fast  
1217 growth and aquatic lifestyle. *Nat Commun* **5**: 3311.

1218 Wang X, Shi X, Chen S, Ma C, Xu S. 2018. Evolutionary Origin, Gradual Accumulation and Functional Divergence  
1219 of Heat Shock Factor Gene Family with Plant Evolution. *Front Plant Sci* **9**: 71.

1220 Xin Z, Mandaokar A, Chen J, Last RL, Browse J. 2007. Arabidopsis ESK1 encodes a novel regulator of freezing  
1221 tolerance. *Plant J* **49**: 786-799.

1222 Xu S, Xu S, Zhou Y, Yue S, Qiao Y, Liu M, Gu R, Song X, Zhang Y, Zhang X. 2020. Sonar and in situ surveys of eelgrass  
1223 distribution, reproductive effort, and sexual recruitment contribution in a eutrophic bay with intensive  
1224 human activities: Implication for seagrass conservation. *Mar Pollut Bull* **161**: 111706.

1225 Xue GP, Sadat S, Drenth J, McIntyre CL. 2014. The heat shock factor family from *Triticum aestivum* in response  
1226 to heat and other major abiotic stresses and their role in regulation of heat shock protein genes. *J Exp*  
1227 *Bot* **65**: 539-557.

1228 Yang Z. 2007a. PAML 4: phylogenetic analysis by maximum likelihood. *Mol Biol Evol* **24**: 1586-1591.

1229 Yang ZH. 2007b. PAML 4: Phylogenetic analysis by maximum likelihood. *Molecular Biology and Evolution* **24**:  
1230 1586-1591.

1231 Yin R, Arongaus AB, Binkert M, Ulm R. 2015. Two distinct domains of the UVR8 photoreceptor interact with COP1  
1232 to initiate UV-B signaling in arabidopsis. *Plant Cell* **27**: 202-213.

1233 Zarnoch CB, Hoellein TJ, Furman BT, Peterson BJ. 2017. Eelgrass meadows, *Zostera marina* (L.), facilitate the  
1234 ecosystem service of nitrogen removal during simulated nutrient pulses in Shinnecock Bay, New York,  
1235 USA. *Mar Pollut Bull* **124**: 376-387.

1236 Zhang GJ, Dong R, Lan LN, Li SF, Gao WJ, Niu HX. 2020. Nuclear Integrants of Organellar DNA Contribute to  
1237 Genome Structure and Evolution in Plants. *Int J Mol Sci* **21**.

1238 Zhao N, Grover CE, Chen Z, Wendel JF, Hua J. 2019. Intergenomic gene transfer in diploid and allopolyploid  
1239 *Gossypium*. *BMC Plant Biol* **19**: 492.

1240 Zheng S, Poczai P, Hyvonen J, Tang J, Amiryousefi A. 2020. Chloroplast: An Online Program for the Versatile  
1241 Plotting of Organelle Genomes. *Front Genet* **11**: 576124.

1242 Zhong X. 2020. Assembly, annotation and analysis of chloroplast genomes. doi:10.26182/5f333d9ac2bee.

1243 Zhuang L, Cao W, Wang J, Yu J, Yang Z, Huang B. 2018. Characterization and Functional Analysis of FaHsfC1b  
1244 from *Festuca arundinacea* Conferring Heat Tolerance in Arabidopsis. *Int J Mol Sci* **19**.

1245 Zwaenepoel A, Van de Peer Y. 2019a. Inference of Ancient Whole-Genome Duplications and the Evolution of  
1246 Gene Duplication and Loss Rates. *Mol Biol Evol* **36**: 1384-1404.

1247 Zwaenepoel A, Van de Peer Y. 2019b. wgd-simple command line tools for the analysis of ancient whole-genome  
1248 duplications. *Bioinformatics* **35**: 2153-2155.

1249

1250
